# Supplementary material for: Trends in population mental health before and after the 2008 recession: a repeat cross-sectional analysis of the 1991–2010 Health Surveys of England
Source: PubMed Central journal article supplement — BMJ Open. 2012 Sep 21;2(5):e001790. doi: 10.1136/bmjopen-2012-001790 (PMC3488736; doi:10.1136/bmjopen-2012-001790), 2012-09-21
Supplement: bmjopen-2012-001790.draft_revisions.pdf [file bmjopen-2012-001790.draft_revisions.pdf]

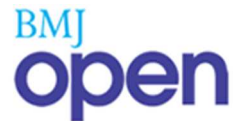

**The Effects of the Recession on Population Mental Health: A Repeat Cross-Sectional Analysis of the Health Surveys of England**

|                                 |                                                                                                                                                                                                                                                                                                                                            |
|---------------------------------|--------------------------------------------------------------------------------------------------------------------------------------------------------------------------------------------------------------------------------------------------------------------------------------------------------------------------------------------|
| Journal:                        | <i>BMJ Open</i>                                                                                                                                                                                                                                                                                                                            |
| Manuscript ID:                  | bmjopen-2012-001790                                                                                                                                                                                                                                                                                                                        |
| Article Type:                   | Research                                                                                                                                                                                                                                                                                                                                   |
| Date Submitted by the Author:   | 11-Jul-2012                                                                                                                                                                                                                                                                                                                                |
| Complete List of Authors:       | Katikireddi, Srinivasa; MRC/CSO Social & Public Health Sciences Unit, Evaluation of Social Interventions programme; NHS Lothian, Public Health and Health Policy<br>Niedzwiedz, Claire; Institute of Health and Wellbeing,<br>Popham, Frank; MRC/CSO Social & Public Health Sciences Unit, Social Patterning of Health Over the Lifecourse |
| <b>Primary Subject Heading</b>: | Public health                                                                                                                                                                                                                                                                                                                              |
| Secondary Subject Heading:      | Epidemiology, Sociology, Mental health, Health policy                                                                                                                                                                                                                                                                                      |
| Keywords:                       | SOCIAL MEDICINE, PUBLIC HEALTH, Depression & mood disorders < PSYCHIATRY, EPIDEMIOLOGY, MENTAL HEALTH, Anxiety disorders < PSYCHIATRY                                                                                                                                                                                                      |
|                                 |                                                                                                                                                                                                                                                                                                                                            |

SCHOLARONE™  
Manuscripts

1  
2  
3 **The Effects of the Recession on Population Mental Health: A Repeat Cross-**  
4 **Sectional Analysis of the Health Surveys of England**  
5  
6

7 Srinivasa Vittal Katikireddi [1]\*  
8 Clinical Research Fellow  
9 Tel: +44 141 357 3949  
10 Fax: +44 141 337 2389  
11 E-mail: [ykatikireddi@sphsu.mrc.ac.uk](mailto:ykatikireddi@sphsu.mrc.ac.uk)  
12  
13

14 Claire L Niedzwiedz [2]  
15 Doctoral Student  
16

17 Frank Popham [1]  
18 Senior Investigator Scientist  
19  
20

21  
22 [1] MRC/CSO Social & Public Health Sciences Unit, 4 Lilybank Health Sciences  
23 Unit, Glasgow, G12 8RZ.  
24 \*Corresponding author  
25

26 [2] Institute of Health and Wellbeing, 1 Lilybank Gardens, University of Glasgow  
27  
28

29 **Funding**

30 SVK is funded by the Chief Scientist Office at the Scottish Health Directorate as part  
31 of the Evaluating Social Interventions programme at the MRC Social and Public  
32 Health Sciences Unit (MC\_US\_A540\_0013). FP is funded by the MRC (5TK10).  
33 CLN has received no funding for this study. The funders had no influence over the  
34 study design, data collection, analysis, interpretation of data, writing of the paper or  
35 decision to submit. The paper does not necessarily represent the views of the funding  
36 or employing organisations. SVK had full access to the data and take responsibility  
37 for the integrity of the data and the accuracy of analysis.  
38  
39

40 SVK acts as guarantor for this article.  
41

42 Data sharing: Additional results are available as a supplemental file from the BMJ  
43 website. The Health Surveys for England are available from the UK Data Archive.  
44  
45

46 Ethical approval was not required for this study.  
47

48 Word count (of main manuscript): 2,531  
49

50 **Competing Interest Statement**

51 All authors have completed the Unified Competing Interest form at  
52 [www.icmje.org/coi\\_disclosure.pdf](http://www.icmje.org/coi_disclosure.pdf) (available on request from the corresponding  
53 author) and declare that they have no conflicts of interest.  
54  
55

56 **Copyright Statement**  
57  
58  
59  
60

1  
2  
3 The Corresponding Author has the right to grant on behalf of all authors and does  
4 grant on behalf of all authors, a [worldwide licence](#) to the Publishers and its licensees  
5 in perpetuity, in all forms, formats and media (whether known now or created in the  
6 future), to i) publish, reproduce, distribute, display and store the Contribution, ii)  
7 translate the Contribution into other languages, create adaptations, reprints, include  
8 within collections and create summaries, extracts and/or, abstracts of the  
9 Contribution, iii) create any other derivative work(s) based on the Contribution, iv) to  
10 exploit all subsidiary rights in the Contribution, v) the inclusion of electronic links  
11 from the Contribution to third party material where-ever it may be located; and, vi)  
12 licence any third party to do any or all of the above.  
13  
14  
15  
16  
17  
18  
19  
20  
21  
22  
23  
24  
25  
26  
27  
28  
29  
30  
31  
32  
33  
34  
35  
36  
37  
38  
39  
40  
41  
42  
43  
44  
45  
46  
47  
48  
49  
50  
51  
52  
53  
54  
55  
56  
57  
58  
59  
60

## **Abstract**

**Objective:** To assess the short-term impact of the 2008 recession on population mental health and explore how and why its impact may differ by gender, age and socio-economic position.

**Design:** Repeat cross-sectional analysis of survey data

**Setting:** England

**Participants:** Representative samples of the working age (25-64 years) general population participating in the Health Survey for England between 1991 and 2010 inclusive.

**Main Outcome Measures:** Prevalence of poor mental health (caseness) as measured by the General Health Questionnaire-12 (GHQ)

**Results:** Age-sex standardised prevalence of GHQ caseness increased from 13.7% (95% CI 12.9-14.5%) in 2008 to 16.4% (95% CI 14.9-17.9%) in 2009 and 15.5% (95% CI 14.4-16.7%) in 2010. Women had a consistently greater prevalence since 1991 until the current recession. However, compared to 2008, men experienced an increase in age-adjusted caseness of 5.1% (95% CI 2.6-7.6%,  $p<0.001$ ) in 2009 and 3.0% (95% CI 1.2-4.9%,  $p=0.001$ ) in 2010, while no statistically significant changes were seen in women. Adjustment for differences in employment status and education level did not account for the observed increase in men nor did they explain the differential gender patterning. Over the last decade, socio-economic inequalities showed a tendency to increase but no clear evidence for an increase in inequalities associated with the recession was found. Similarly, no evidence was found for a differential effect between age groups.

**Conclusions:** Population mental health in men has been adversely affected within two years of the onset of the current recession. These changes, and their patterning by gender, could not be accounted for by differences in employment status. Further work is needed to monitor recessionary impacts on health inequalities in response to ongoing labour market and social policy changes.

Words: 277

### **What is already known on this subject?**

Previous studies have found differing impacts of recession on mental health, with some outcomes, such as suicide, increasing in men more than women. However, as the labour market changes and employment among women becomes increasingly important, it has been suggested that this gender difference may no longer exist. Few studies have investigated mental health morbidity and its patterning by population subgroups over prolonged periods of time.

### **What this study adds**

The current recession is associated with an increase in the prevalence of poor mental health among men in England. These changes, and their patterning by gender, cannot be accounted for by differences in employment status over time.

## **Introduction**

Macro-economic factors are known to influence population health and health inequalities<sup>1</sup>. The onset of the global economic downturn heralded by the collapse of Lehman Brothers in September 2008 can therefore be considered a potential threat to public health<sup>2-4</sup>. In the UK, national gross domestic product (GDP) has fallen in real terms (with a 5.5% fall per head of population between 2008 and 2009) and unemployment rates have increased since the recession began<sup>5</sup>. Neither indicator has yet recovered to pre-recession levels at the time of writing<sup>6</sup>. Unemployment is associated with a number of adverse health impacts including poor mental health, short-term increases in adverse health behaviours and increased mortality risk<sup>7-9</sup>. However, the effects of recession appear to be more complex than would be expected from the impact of increases in unemployment alone. For example, there is a growing body of research suggesting that at least in the short term, recessions are associated with a faster decline in mortality although some specific causes of death, such as suicide, may rise<sup>10</sup>. Thus, mortality impacts of recessions may be more complex than intuition suggests and likely vary by outcome and context<sup>4,7</sup>.

Less empirical analysis has focused on the effect of recession on trends in population mental health. Macro-economic change could potentially have a more rapid effect on mental health compared to mortality, particularly for those of working age. Historically, both periods of recession and unemployment appear to have had a greater impact on men compared to women<sup>7</sup>. However, it has been suggested that this differential impact may no longer be present as growing female labour market participation may increase their susceptibility to macro-economic changes<sup>11,12</sup>. In addition, it is not clear to what extent changes in health status associated with recessionary periods are mediated purely through changes in labour market status. The UK experienced its first recession since 1991 (defined as two quarters of negative growth in gross domestic product) in late 2008<sup>13</sup>. Unemployment (which is commonly used as a marker of recession that has a more direct effect on health) showed marked increases between 1991-3 and 2008-10.

In this paper, we aim to assess the short-term impact of the recent recession on population mental health and inequalities (by gender, age and socio-economic position) by placing it in a longer historical context. We further aim to investigate to what extent any observed recessionary impacts and their patterning by subgroups can be accounted for by differences in employment status or education level.

## **Methods**

### **Data sources**

We used data from the Health Survey for England, a nationally representative cross-sectional survey of the community dwelling population, conducted annually from 1991 onwards. Survey methodology has been described elsewhere<sup>14-16</sup>. Household response rates for the period studied varied from 85% in 1991 to 64% in 2008.

Unemployment rates (available for the whole period) and gross GDP per head (comparable data available for 1991-2009) for the UK were retrieved to provide

1  
2  
3 context for the interpretation of trends<sup>5 17</sup>. In addition, unemployment data for  
4 England (available for 1993 onwards) were retrieved and showed similar trends to the  
5 UK data<sup>18</sup>. These macro-economic indicators all show marked deterioration between  
6 2008 and 2009; hence we use 2008 as the reference year for comparison.  
7  
8

### 9 10 Population

11 The study population was restricted to participants of a working age, between 25  
12 years and 64 years inclusive. Those aged under 25 years were excluded to minimise  
13 misclassification of education level. Participants missing any data on age, sex, highest  
14 education level, employment status and outcome were excluded from the analysis  
15 (5.15% of total sample excluded). We excluded 2918 participants (2.59% of the  
16 sample) with foreign/other qualifications as we were unable to categorise their highest  
17 educational attainment accurately. We excluded 847 individuals (0.75%) who defined  
18 themselves as doing unpaid work for their family, waiting to take up employment or  
19 undertaking government training schemes. Results of overall prevalence estimates  
20 were similar when those with missing data (apart from the 1.60% missing outcome  
21 data) were included.  
22  
23  
24

### 25 Exposures

26 Socio-economic position was assessed using highest education level (self-reported)  
27 and area-level deprivation. Comparable information on education level was available  
28 for every survey year except 1995 and 1996 and area-level deprivation was available  
29 from 2001 onwards. Educational level was coded into four categories: degree-level or  
30 equivalent qualifications, A-level or equivalent, GCSE or equivalent and no  
31 qualifications, while index for multiple deprivation (IMD) was coded into quintiles.  
32 Participants were asked to self-identify their employment status based on their activity  
33 in the previous week before the survey interview. Employment status was coded into  
34 six categories: employed, unemployed, unable to work due to ill health, looking after  
35 family/maternity care, retired and in full-time education.  
36  
37  
38

### 39 Outcome Measures

40 Mental health was assessed in every survey year except 1996 and 2007 through the  
41 general health questionnaire (GHQ-12). GHQ-12 is a screening tool for anxiety and  
42 depression, validated for use in epidemiological studies<sup>19</sup>. Respondents scoring 4 or  
43 more have a high likelihood of poor mental health and are considered a 'case'<sup>20</sup>.  
44

### 45 Statistical Analysis

46 For the first stage of analysis, we analysed data for each year separately. Prevalence  
47 estimates for GHQ caseness (age-sex standardisation to the WHO European standard  
48 population) were calculated for each year, stratified by age, sex, education level and  
49 employment status.  
50

51  
52 In the second stage of analysis, logistic regression analysis was conducted for each  
53 year separately to explore any differential patterning in recession years between men  
54 and women. To measure the extent of socio-economic inequality in prevalence on a  
55 relative scale we calculated the relative index of inequality using a Poisson modelling  
56 approach [15].  
57  
58  
59  
60

1  
2  
3 We directly tested the impact of the recent recession in the final stage of the analysis  
4 by creating a combined dataset for all years and creating a logistic regression model  
5 adjusting for year, age, education level and employment status. Men and women were  
6 analysed separately given the effect modification observed between genders and year.  
7

8  
9 All analyses were carried out using Stata v11.2. Weights for non-response (available  
10 from 2003 onwards) were used for all analyses. These were scaled to a mean of 1 for  
11 each year to allow analysis of the combined dataset. Robust standard errors were used  
12 to adjust for survey clustering at the area level. Adjusted prevalence differences were  
13 derived from the logistic regression models as well as odds ratios in order to allow  
14 comparisons across models to be made on the absolute scale<sup>21</sup>.  
15

## 16 17 **Results**

18  
19 A total of 106,985 participants were included in the main analysis of trends in GHQ  
20 caseness (Table 1). The sample response rate declined gradually over time, but they  
21 were broadly comparable over the most recent years with no marked changes in  
22 response rates during the onset of the current recession. There was also socio-  
23 economic change with a decline in the percentage of people with no qualifications and  
24 an increase in participants with a degree.  
25

26  
27 GHQ caseness was relatively high during the time of the early 1990s recession  
28 (Figure 1). Since then, there has been an indication of a general downward trend with  
29 some variability, until a more recent increase in prevalence that occurs after 2008.  
30 Caseness increased from 13.7% (95% CI 12.9-14.5%) in 2008 to 16.4% (95% CI  
31 14.9-17.9%) in 2009.  
32

## 33 34 **Impact by Subgroups**

35  
36 A gender differential in GHQ caseness is apparent; women have a consistently higher  
37 prevalence over most of the time period (Figure 2). However, during the early 1990s  
38 recession, men had a larger increase in prevalence of GHQ caseness from 12.3% in  
39 1991 to 14.5% in 1992. A similar trend is seen following the 2008 recession with an  
40 increase from 11.3% to 16.6% in men, compared to 16.0% to 16.2% in women  
41 between 2008 and 2009.  
42

43  
44 Stratified analysis by age shows that changes in mental health during recessionary  
45 periods are not confined to any specific age groups (see on-line appendix). Sensitivity  
46 analysis including those aged 16-24 years showed no clear difference in trends.  
47

48  
49 In the early 1990s, stratification by education level reveals an initial reverse education  
50 gradient in GHQ caseness (Figure 3). Over time, a growing disparity in GHQ  
51 caseness between those most and least educated is apparent, with the highest levels of  
52 inequality in poor mental health observed in 2005. A similar pattern is seen when  
53 assessing caseness by area-level deprivation (Figure 4). The greatest levels of relative  
54 indices of inequality are also seen since 2005 when assessed by either measure of  
55 socio-economic position (Figure 5). No significant impact of the recession by  
56 deprivation is observed.  
57  
58  
59  
60

1  
2  
3 Changes in population mental health do not appear to be entirely mediated by changes  
4 in employment status. For example, the prevalence of GHQ caseness amongst those in  
5 employment increased during both recessionary periods: from 13.4% (95% CI 11.4-  
6 15.5%) to 14.8% (95% CI 13.1-16.6%) in 1991-2 and from 9.9% (95% CI 9.2-10.7%)  
7 to 12.9% (11.3-14.4%) between 2008 and 2009 (Figure 6).  
8  
9

### 10 11 **Exploration of the Differential Trends by Gender**

12  
13 A combined dataset for all years was analysed separately for men and women, given  
14 the effect modification observed. Compared to a baseline of 2008, age-adjusted  
15 caseness increased by 5.1% (95% 2.6-7.6%,  $p<0.001$ ) in 2009 and 3.0% (95% 1.2-  
16 4.9%,  $p=0.001$ ) in 2010 amongst men but no statistically significant changes are seen  
17 in women (Table 2). Adding employment status to the model suggests that changes in  
18 employment status do not explain this increase in poor mental health. Similarly,  
19 adjustment for changes in employment status and education level does not account for  
20 this increase in prevalence.  
21  
22

23 We attempted to explore the reasons for the increased adverse effect of the recession  
24 among men. When analysing data from each year separately, adjustment for  
25 differences in education level and employment status between genders did not  
26 account for the larger increases in prevalence amongst men (see Table 3). Therefore,  
27 the differing trend in mental health in men cannot be explained by differing changes  
28 in labour market status.  
29  
30

### 31 32 **Discussion**

33  
34 In this large repeat cross-sectional study of representative samples of the English  
35 population, we have found evidence to suggest population mental health has  
36 deteriorated following the start of the 2008 recession. Notably, this change does not  
37 appear to arise only as a result of an increase in unemployment, but mental health  
38 appears to have declined among those in employment. While some commentators  
39 have recently suggested that the current recession may affect both genders in a similar  
40 manner, we find that the deterioration in mental health appears greatest among men.  
41 Furthermore, this differential impact cannot be adequately accounted for by changes  
42 in employment status (such as greater unemployment) amongst men. We also find  
43 evidence to suggest that socio-economic inequalities (assessed by both highest  
44 education level and area-level deprivation) have increased over the course of the last  
45 decade, but the recession has not had a clear impact on socio-economic inequalities in  
46 mental health to date.  
47  
48

49 Our study has a number of strengths. We used a large nationally representative dataset  
50 which used a validated screening test for anxiety and depression. Importantly, we  
51 assessed trends over a long length of time with annual measures available for most of  
52 the period and an outcome likely to be sensitive to changes in the macro-economic  
53 environment. This allows greater certainty in attribution compared to studies limited  
54 to comparisons of single before and after surveys. However, as our study makes use  
55 of available data, a number of important limitations exist. First, data was not available  
56 for every year, with the omission of GHQ in 2007 potentially problematic as this  
57  
58  
59  
60



1  
2  
3 represents the last full pre-recessionary year. Second, our outcome measure does not  
4 equate to a clinically-defined mental health condition. It cannot therefore be assumed  
5 that changes in GHQ caseness correlate with clinically diagnosed illness. Third, we  
6 have been limited to repeat cross-sectional analysis. Longitudinal analysis of  
7 individuals would allow greater scope for relating changes in individual employment  
8 status to health. Lastly, while our study has attempted to investigate the impact of  
9 changes in population mental health associated with the recession, we cannot establish  
10 whether this is a causal relationship, as other temporal changes could account for the  
11 observed trends. However, many factors that could potentially account for our  
12 findings, such as changes in health or social care provision, could also be considered  
13 mediating factors rather than confounders.  
14  
15

16 Much previous research has focussed on mortality, and in particular suicide,  
17 associated with recession. In an analysis of cause-specific mortality and its association  
18 with recession in European countries, Stuckler et al. found that the most consistently  
19 observed relationship was an increase in suicide amongst young men<sup>22</sup>. More  
20 recently, they found that increases in suicide rates have been observed across  
21 European countries following the onset of the current recession<sup>23</sup>. Consistent  
22 increases in male suicide rates have been noted in many other studies<sup>24</sup>. The  
23 relationships between morbidity in mental health, health inequalities and recessions  
24 are less well understood and findings differ between studies<sup>7,25</sup>. A recent before and  
25 after comparison of patients attending primary care services in Spain found a marked  
26 increase in the prevalence of mental health disorders following the onset of the  
27 current global recession<sup>26</sup>. Household unemployment and mortgage difficulties were  
28 particularly associated with these attendances. However, not all studies have found an  
29 effect of economic recession on mental health. For example, Vinamaki et al found no  
30 statistically significant increase in poor mental health (assessed using GHQ) following  
31 the economic recession in Finland between 1993 to 1995 in repeated general  
32 population samples<sup>27</sup>.  
33  
34  
35

36 While our study finds men's mental health has been affected more adversely than  
37 women, it should be noted that important indirect effects of the recession, including  
38 changes in the public sector workforce and changes in government assistance for  
39 children, had yet to be implemented during the time of this study. Our analysis does  
40 not yet show any indication of worsening mental health inequalities associated with  
41 the current recession. However, there is a general trend towards a greater level of  
42 inequality more recently and there is no evidence to suggest narrowing. Further  
43 research will be required to assess ongoing impacts of the recession by gender and  
44 socio-economic position. As our analysis was restricted to a working-age population,  
45 research focussing on retired individuals is also needed to investigate the potential  
46 impact in older age groups. The existing evidence suggests that the relationship  
47 between mental health and recessions differs, at least in part, by social welfare system  
48 <sup>10,22,28-31</sup>. There is therefore a need for cross-national comparisons of trends in  
49 population health and health inequalities to better identify social policy responses that  
50 protect from the adverse health impacts of recession.  
51  
52  
53

54 The finding that mental health across the general population has been adversely  
55 impacted by the recession, and does not appear to be limited to those out of  
56 employment, has important implications. Previous research has highlighted the  
57 importance of job insecurity, rather than solely employment status, as potentially  
58  
59  
60

1  
2  
3 resulting in adverse effects on mental health<sup>32</sup>. One potential explanation for our  
4 results would be that job insecurity during the current recession is responsible for the  
5 deterioration in mental health with men's psychological health remaining more  
6 affected by economic fluctuations despite greater female labour market participation.  
7 This paper highlights the continuing importance of addressing mental health issues  
8 using population-wide approaches by both policymakers and health professionals and  
9 not limiting such efforts to those directly affected by unemployment.  
10

### 11 12 13 14 15 Acknowledgements

16  
17 We would like to acknowledge the assistance of the UK Data Archive for providing  
18 access to the data; the Information Centre for health and social care and Department  
19 of Health for sponsoring the Health Survey for England; and the Principal  
20 Investigators of the Health Survey for England, Natcen Social Research and the  
21 Department of Epidemiology and Public Health at the Royal Free and University  
22 College Medical School. In addition, we would like to thank Geoff Der at the  
23 MRC/CSO Social & Public Health Sciences Unit for providing statistical advice. The  
24 responsibility for the analysis presented here lies solely with the authors.  
25  
26  
27  
28  
29  
30  
31  
32  
33  
34  
35  
36  
37  
38  
39  
40  
41  
42  
43  
44  
45  
46  
47  
48  
49  
50  
51  
52  
53  
54  
55  
56  
57  
58  
59  
60

Table 1: characteristics of study participants

| Year | Sex (%) |      | Age group (%) |       |       |       | Highest education level (%) |         |      |      | Employment status in last week (%) |            |                               |         |                    | Sample | Response rate (%) |              |
|------|---------|------|---------------|-------|-------|-------|-----------------------------|---------|------|------|------------------------------------|------------|-------------------------------|---------|--------------------|--------|-------------------|--------------|
|      | M       | F    | 25-34         | 35-44 | 45-54 | 55-64 | Degree                      | A-level | GCSE | None | Employed                           | Unemployed | Not working due to ill health | Retired | Looking after home |        |                   | In education |
| 1991 | 46.7    | 53.3 | 29.8          | 27.5  | 21.8  | 20.8  | 11.8                        | 18.7    | 33.4 | 36.0 | 71.9                               | 5.5        | 4.5                           | 4.5     | 13.1               | 0.5    | 2,001             | 85           |
| 1992 | 47.3    | 52.7 | 29.2          | 28.4  | 22.6  | 19.8  | 11.8                        | 22.0    | 35.6 | 30.6 | 69.3                               | 6.1        | 4.4                           | 6.1     | 13.0               | 1.1    | 2,484             | 82           |
| 1993 | 47.5    | 52.5 | 29.7          | 26.6  | 24.3  | 19.4  | 12.8                        | 21.7    | 33.3 | 32.2 | 70.9                               | 6.3        | 4.3                           | 5.5     | 12.4               | 0.6    | 10,502            | 81           |
| 1994 | 46.7    | 53.3 | 30.2          | 27.3  | 23.1  | 19.5  | 13.0                        | 21.9    | 34.4 | 30.7 | 70.9                               | 5.5        | 4.5                           | 5.8     | 12.4               | 1.0    | 9,981             | 77           |
| 1997 | 47.2    | 52.8 | 29.1          | 27.4  | 25.0  | 18.5  | 16.4                        | 24.8    | 31.2 | 27.6 | 71.7                               | 3.3        | 6.4                           | 4.8     | 12.8               | 1.1    | 5,377             | 76           |
| 1998 | 46.6    | 53.4 | 28.4          | 27.5  | 25.2  | 18.9  | 16.6                        | 24.1    | 33.0 | 26.3 | 73.4                               | 2.0        | 6.1                           | 5.4     | 11.6               | 1.4    | 9,748             | 74           |
| 1999 | 46.9    | 53.1 | 26.5          | 29.0  | 25.6  | 18.9  | 18.0                        | 25.0    | 31.1 | 26.0 | 72.3                               | 2.3        | 6.6                           | 5.1     | 12.3               | 1.4    | 4,750             | 76           |
| 2000 | 45.8    | 54.2 | 26.8          | 30.3  | 23.3  | 19.6  | 18.9                        | 27.3    | 31.0 | 22.8 | 72.3                               | 2.1        | 6.6                           | 5.8     | 11.6               | 1.6    | 4,982             | 75           |
| 2001 | 45.7    | 54.3 | 24.9          | 29.6  | 25.3  | 20.2  | 19.6                        | 26.1    | 32.6 | 21.6 | 73.3                               | 2.0        | 6.4                           | 6.2     | 10.3               | 1.7    | 9,457             | 74           |
| 2002 | 43.4    | 56.6 | 25.7          | 31.8  | 22.7  | 19.8  | 21.0                        | 27.9    | 32.7 | 18.5 | 71.4                               | 2.1        | 5.6                           | 6.0     | 13.6               | 1.4    | 4,619             | 74           |
| 2003 | 45.4    | 54.6 | 23.3          | 29.7  | 23.8  | 23.2  | 21.8                        | 25.8    | 32.5 | 19.8 | 74.6                               | 1.6        | 6.1                           | 6.3     | 10.2               | 1.4    | 8,982             | 73           |
| 2004 | 43.4    | 56.6 | 22.5          | 29.2  | 23.6  | 24.8  | 23.0                        | 25.7    | 29.8 | 21.5 | 73.0                               | 1.4        | 5.9                           | 7.4     | 10.7               | 1.6    | 4,076             | 72           |
| 2005 | 44.8    | 55.2 | 22.5          | 26.6  | 26.5  | 24.4  | 23.6                        | 25.9    | 30.1 | 20.5 | 73.8                               | 1.7        | 6.3                           | 6.2     | 10.6               | 1.4    | 4,590             | 74           |
| 2006 | 44.7    | 55.3 | 21.2          | 28.8  | 24.9  | 25.2  | 25.5                        | 26.8    | 29.2 | 18.5 | 73.9                               | 1.8        | 5.9                           | 6.8     | 10.3               | 1.3    | 8,605             | 68           |
| 2008 | 44.7    | 55.3 | 22.0          | 27.5  | 25.2  | 25.3  | 25.6                        | 28.0    | 28.7 | 17.7 | 74.0                               | 2.1        | 5.4                           | 7.4     | 9.6                | 1.6    | 9,228             | 64           |
| 2009 | 45.6    | 54.4 | 21.7          | 28.8  | 25.0  | 24.6  | 26.4                        | 25.6    | 30.9 | 17.0 | 73.4                               | 3.1        | 5.5                           | 7.4     | 9.0                | 1.7    | 2,773             | 68           |
| 2010 | 43.5    | 56.5 | 21.3          | 26.5  | 27.6  | 24.6  | 28.2                        | 28.3    | 29.7 | 13.9 | 73.1                               | 3.1        | 5.8                           | 7.4     | 9.0                | 1.6    | 4,830             | 66           |

1  
2  
3  
4  
5  
6  
7  
8  
9  
10  
11  
12  
13  
14  
15  
16  
17  
18  
19  
20  
21  
22  
23  
24  
25  
26  
27  
28  
29  
30  
31  
32  
33  
34  
35  
36  
37  
38  
39  
40  
41  
42  
43  
44  
45  
46  
47  
48  
49

Table 2: Analysis of Data from 1991-2010 in Men and Women Adjusted for Age, Employment Status and Education (Selected Years Shown)

|                | Model 1: Age |       |              |              | Model 2: Age + Employment Status |       |              |              | Model 3: Age + Employment Status + Education |       |              |              |
|----------------|--------------|-------|--------------|--------------|----------------------------------|-------|--------------|--------------|----------------------------------------------|-------|--------------|--------------|
| <b>Males</b>   |              |       |              |              |                                  |       |              |              |                                              |       |              |              |
| Year           | OR           | P     | Lower 95% CI | Upper 95% CI | OR                               | P     | Lower 95% CI | Upper 95% CI | OR                                           | P     | Lower 95% CI | Upper 95% CI |
| 2005           | 0.97         | 0.723 | 0.82         | 1.15         | 0.92                             | 0.370 | 0.78         | 1.10         | 0.93                                         | 0.394 | 0.78         | 1.10         |
| 2006           | 1.06         | 0.465 | 0.91         | 1.22         | 1.05                             | 0.511 | 0.91         | 1.22         | 1.05                                         | 0.506 | 0.91         | 1.22         |
| 2008           | 1.00         | -     | -            | -            | 1.00                             | -     | -            | -            | 1.00                                         | -     | -            | -            |
| 2009           | 1.53         | 0.000 | 1.26         | 1.86         | 1.50                             | 0.000 | 1.24         | 1.82         | 1.50                                         | 0.000 | 1.24         | 1.82         |
| 2010           | 1.31         | 0.001 | 1.12         | 1.54         | 1.31                             | 0.001 | 1.11         | 1.54         | 1.30                                         | 0.002 | 1.10         | 1.53         |
|                |              |       |              |              |                                  |       |              |              |                                              |       |              |              |
|                | % difference | P     | Lower 95% CI | Upper 95% CI | % difference                     | P     | Lower 95% CI | Upper 95% CI | % difference                                 | P     | Lower 95% CI | Upper 95% CI |
| 2005           | -0.31        | 0.722 | -2.02        | 1.40         | -0.75                            | 0.367 | -2.12        | 1.32         | -0.71                                        | 0.391 | -2.34        | 0.92         |
| 2006           | 0.56         | 0.465 | -0.95        | 2.08         | 0.49                             | 0.511 | -0.97        | 2.09         | 0.50                                         | 0.506 | -0.96        | 1.95         |
| 2008           | 0.00         | -     | -            | -            | 0.00                             | -     | -            | -            | 0.00                                         |       | -            | -            |
| 2009           | 5.07         | 0.000 | 2.60         | 7.55         | 4.54                             | 0     | 2.67         | 7.65         | 4.52                                         | 0.000 | 2.21         | 6.83         |
| 2010           | 3.04         | 0.001 | 1.17         | 4.91         | 2.86                             | 0.002 | 1.32         | 5.13         | 2.79                                         | 0.002 | 1.01         | 4.56         |
|                |              |       |              |              |                                  |       |              |              |                                              |       |              |              |
| <b>Females</b> |              |       |              |              |                                  |       |              |              |                                              |       |              |              |
|                | OR           | P     | Lower 95% CI | Upper 95% CI | OR                               | P     | Lower 95% CI | Upper 95% CI | OR                                           | P     | Lower 95% CI | Upper 95% CI |

1  
2  
3  
4  
5  
6  
7  
8  
9  
10  
11  
12  
13  
14  
15  
16  
17  
18  
19  
20  
21  
22  
23  
24  
25  
26  
27  
28  
29  
30  
31  
32  
33  
34  
35  
36  
37  
38  
39  
40  
41  
42  
43  
44  
45  
46  
47  
48  
49

|             |                     |          |                     |                     |                     |          |                     |                     |                     |          |                     |                     |
|-------------|---------------------|----------|---------------------|---------------------|---------------------|----------|---------------------|---------------------|---------------------|----------|---------------------|---------------------|
| <b>2005</b> | 1.01                | 0.917    | 0.88                | 1.15                | 1.00                | 0.958    | 0.88                | 1.15                | 1.00                | 0.956    | 0.88                | 1.15                |
| <b>2006</b> | 0.96                | 0.467    | 0.86                | 1.07                | 0.95                | 0.342    | 0.85                | 1.06                | 0.95                | 0.344    | 0.85                | 1.06                |
| <b>2008</b> | 1.00                | -        | -                   | -                   | 1.00                | -        | -                   | -                   | 1.00                | -        | -                   | -                   |
| <b>2009</b> | 1.04                | 0.641    | 0.88                | 1.23                | 1.06                | 0.522    | 0.90                | 1.24                | 1.06                | 0.523    | 0.90                | 1.24                |
| <b>2010</b> | 1.06                | 0.369    | 0.93                | 1.22                | 1.05                | 0.493    | 0.91                | 1.20                | 1.05                | 0.482    | 0.92                | 1.20                |
|             |                     |          |                     |                     |                     |          |                     |                     |                     |          |                     |                     |
|             | <b>% difference</b> | <b>P</b> | <b>Lower 95% CI</b> | <b>Upper 95% CI</b> | <b>% difference</b> | <b>P</b> | <b>Lower 95% CI</b> | <b>Upper 95% CI</b> | <b>% difference</b> | <b>P</b> | <b>Lower 95% CI</b> | <b>Upper 95% CI</b> |
| <b>2005</b> | 0.09                | 0.918    | -1.69               | 1.88                | 0.05                | 0.959    | -1.70               | 1.79                | 0.05                | 0.956    | -1.69               | 1.79                |
| <b>2006</b> | -0.55               | 0.467    | -2.04               | 0.94                | -0.70               | 0.341    | -2.13               | 0.74                | -0.69               | 0.344    | -2.13               | 0.74                |
| <b>2008</b> | 0.00                | -        | -                   | -                   | 0.00                | -        | -                   | -                   | 0.00                | -        | -                   | -                   |
| <b>2009</b> | 0.53                | 0.643    | -1.70               | 2.76                | 0.70                | 0.526    | -1.48               | 2.89                | 0.70                | 0.527    | -1.48               | 2.88                |
| <b>2010</b> | 0.84                | 0.372    | -1.01               | 2.70                | 0.63                | 0.495    | -1.18               | 2.43                | 0.64                | 0.485    | -1.16               | 2.44                |

\* Reference group is 2008. Selected years around the current recession shown but analyses for all years available in the on-line appendix.

CI = Confidence Interval

OR = Odds Ratio

P = P value

View Only

Table 3: Odds ratio and % difference for GHQ caseness by year for women

| Year | Model 1 (age adjusted) |       |                       | Model 2 (adjusted for age, education level and employment status) |       |                       |
|------|------------------------|-------|-----------------------|-------------------------------------------------------------------|-------|-----------------------|
|      | OR (95% CI)*           | P     | % difference (95% CI) | OR (95% CI)*                                                      | P     | % difference (95% CI) |
| 1991 | 1.75 (1.40 to 2.20)    | 0.000 | 7.34 (4.40 to 10.27)  | 1.81 (1.39 to 2.36)                                               | 0.000 | 7.53 (4.30 to 10.75)  |
| 1992 | 1.46 (1.16 to 1.84)    | 0.001 | 5.31 (2.14 to 8.48)   | 1.59 (1.25 to 2.02)                                               | 0.000 | 6.32 (3.10 to 9.54)   |
| 1993 | 1.43 (1.29 to 1.57)    | 0.000 | 4.87 (3.52 to 6.22)   | 1.55 (1.39 to 1.73)                                               | 0.000 | 5.83 (4.37 to 7.30)   |
| 1994 | 1.61 (1.45 to 1.78)    | 0.000 | 6.32 (4.98 to 7.66)   | 1.77 (1.58 to 1.99)                                               | 0.000 | 7.33 (5.90 to 8.76)   |
| 1997 | 1.59 (1.38 to 1.84)    | 0.000 | 6.17 (4.27 to 8.06)   | 1.68 (1.43 to 1.96)                                               | 0.000 | 6.55 (4.62 to 8.49)   |
| 1998 | 1.47 (1.31 to 1.64)    | 0.000 | 4.98 (3.56 to 6.39)   | 1.58 (1.39 to 1.79)                                               | 0.000 | 5.64 (4.15 to 7.13)   |
| 1999 | 1.29 (1.11 to 1.50)    | 0.001 | 3.59 (1.50 to 5.67)   | 1.40 (1.19 to 1.65)                                               | 0.000 | 4.44 (2.30 to 6.59)   |
| 2000 | 1.47 (1.24 to 1.73)    | 0.000 | 4.63 (2.66 to 6.61)   | 1.61 (1.33 to 1.94)                                               | 0.000 | 5.22 (3.19 to 7.26)   |
| 2001 | 1.44 (1.28 to 1.62)    | 0.000 | 4.19 (2.85 to 5.53)   | 1.55 (1.37 to 1.77)                                               | 0.000 | 4.75 (3.38 to 6.13)   |
| 2002 | 1.41 (1.21 to 1.64)    | 0.000 | 4.73 (2.71 to 6.76)   | 1.51 (1.27 to 1.78)                                               | 0.000 | 5.32 (3.19 to 7.45)   |
| 2003 | 1.29 (1.14 to 1.45)    | 0.000 | 2.91 (1.52 to 4.29)   | 1.38 (1.20 to 1.58)                                               | 0.000 | 3.44 (1.99 to 4.88)   |
| 2004 | 1.35 (1.11 to 1.63)    | 0.002 | 3.37 (1.25 to 5.49)   | 1.40 (1.14 to 1.71)                                               | 0.001 | 3.51 (1.38 to 5.65)   |
| 2005 | 1.52 (1.29 to 1.80)    | 0.000 | 4.85 (2.97 to 6.72)   | 1.68 (1.40 to 2.03)                                               | 0.000 | 5.46 (3.57 to 7.35)   |
| 2006 | 1.33 (1.18 to 1.49)    | 0.000 | 3.29 (1.92 to 4.67)   | 1.40 (1.22 to 1.60)                                               | 0.000 | 3.57 (2.18 to 4.96)   |
| 2008 | 1.46 (1.29 to 1.65)    | 0.000 | 4.41 (3.03 to 5.79)   | 1.54 (1.34 to 1.76)                                               | 0.000 | 4.52 (3.11 to 5.94)   |
| 2009 | 0.99 (0.79 to 1.24)    | 0.927 | -0.15 (-3.26 to 2.97) | 1.09 (0.86 to 1.39)                                               | 0.465 | 1.13 (-1.89 to 4.15)  |
| 2010 | 1.19 (1.01 to 1.39)    | 0.036 | 2.24 (0.16 to 4.32)   | 1.24 (1.04 to 1.48)                                               | 0.016 | 2.63 (0.52 to 4.75)   |

\* Reference group is men  
 CI = Confidence Interval  
 OR = Odds Ratio  
 P = P value

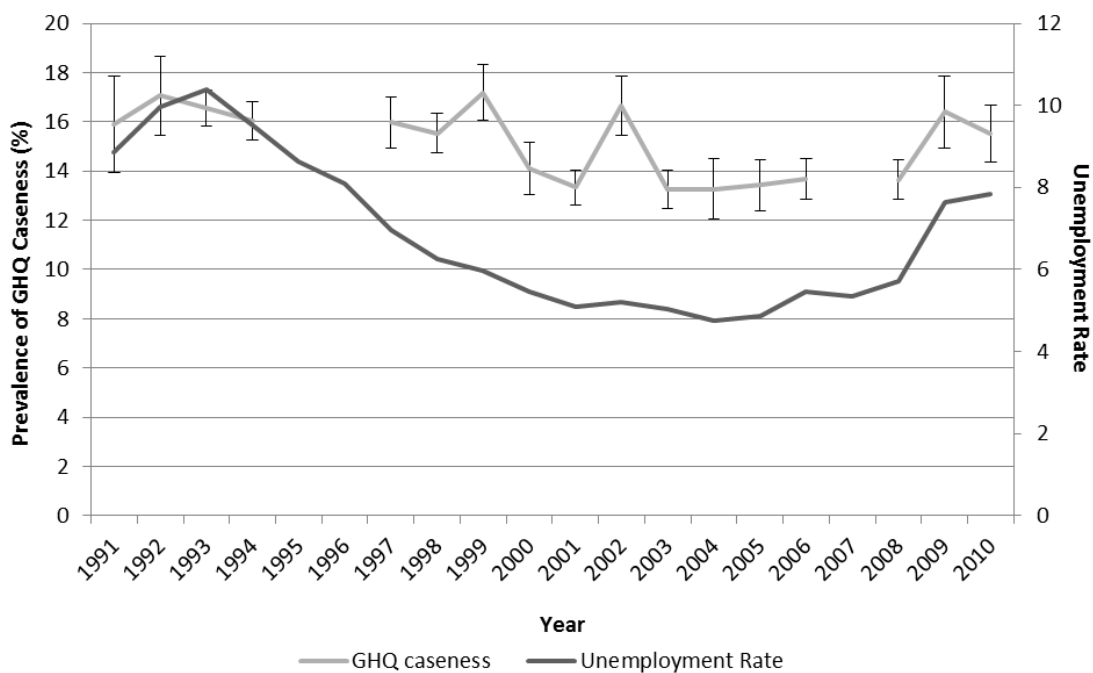

Figure 1: Overall prevalence of GHQ caseness and unemployment rate 1991 to 2010

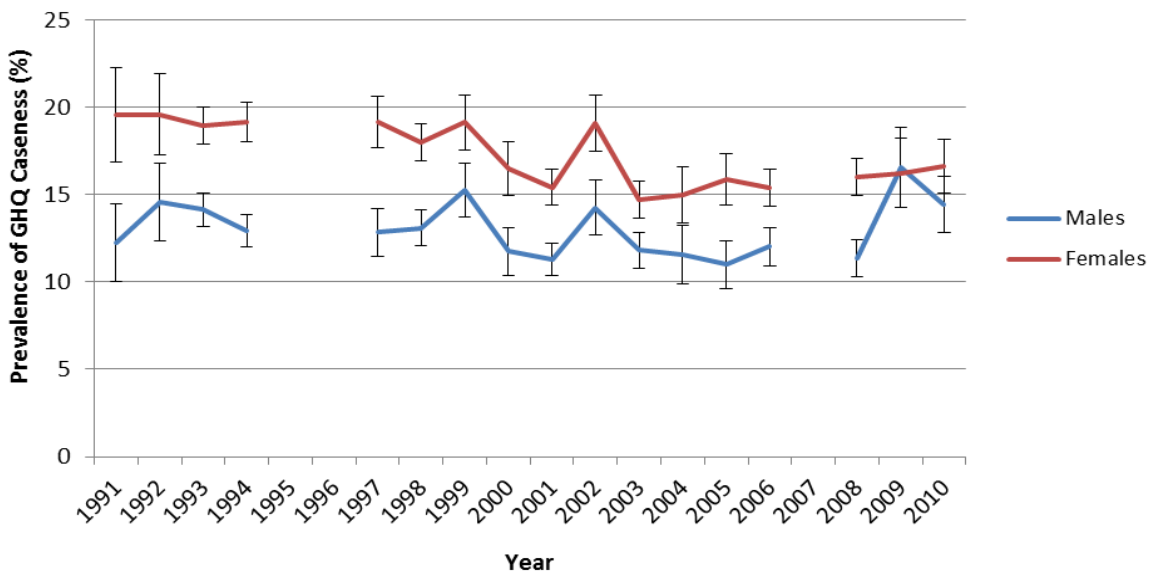

Figure 2: Prevalence of GHQ caseness by gender 1991 to 2010

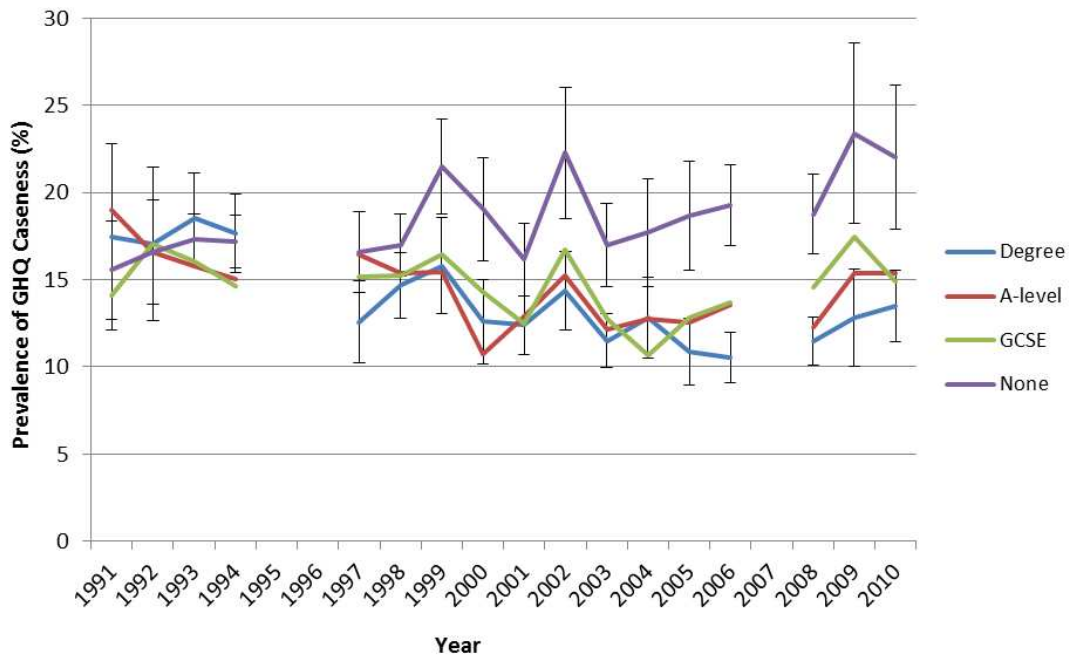

Figure 3: Prevalence of GHQ caseness by highest education level 1991 to 2010

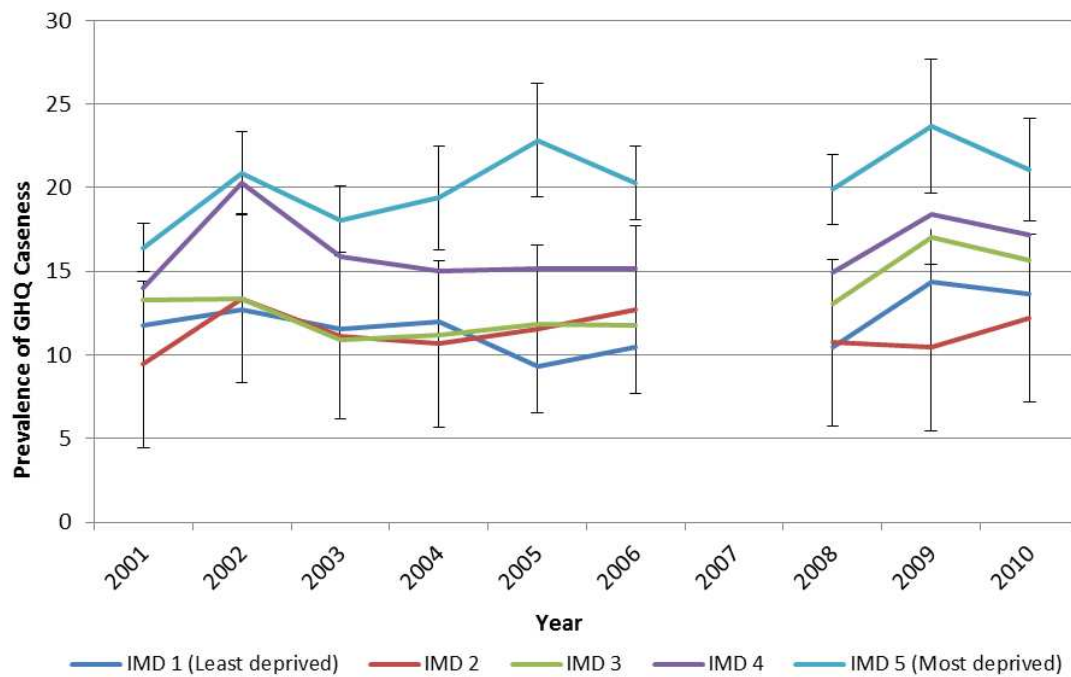

Figure 4: Prevalence of GHQ caseness by area-level deprivation (index for multiple deprivation, IMD) 2001 to 2010



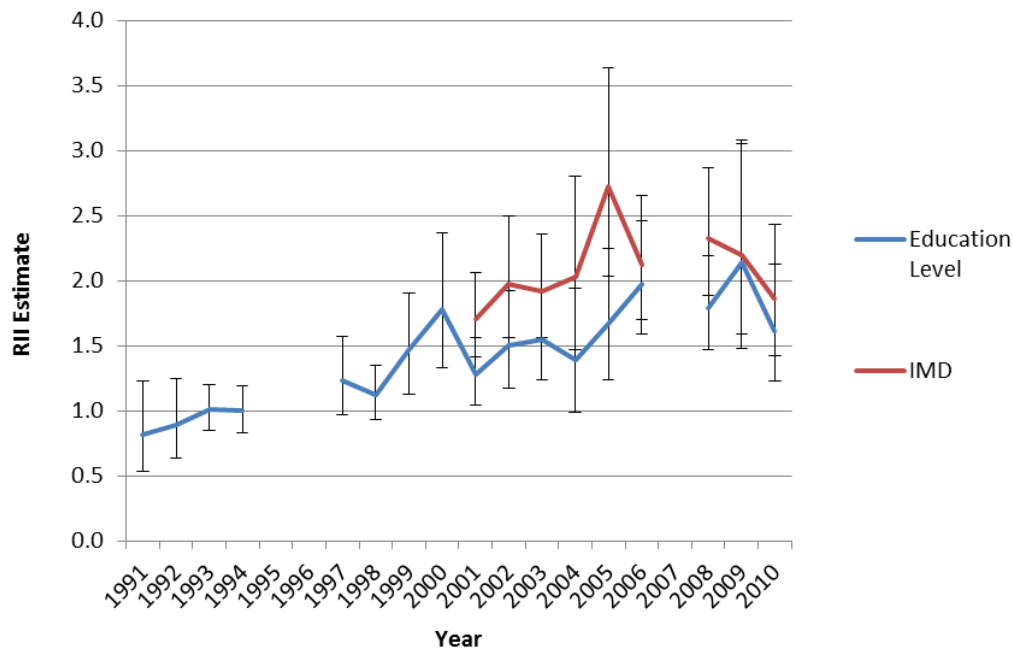

Figure 5: Relative Index of Inequality (RII) for GHQ Caseness as assessed education level and area-level deprivation (index for multiple deprivation, IMD) 1991 to 2010

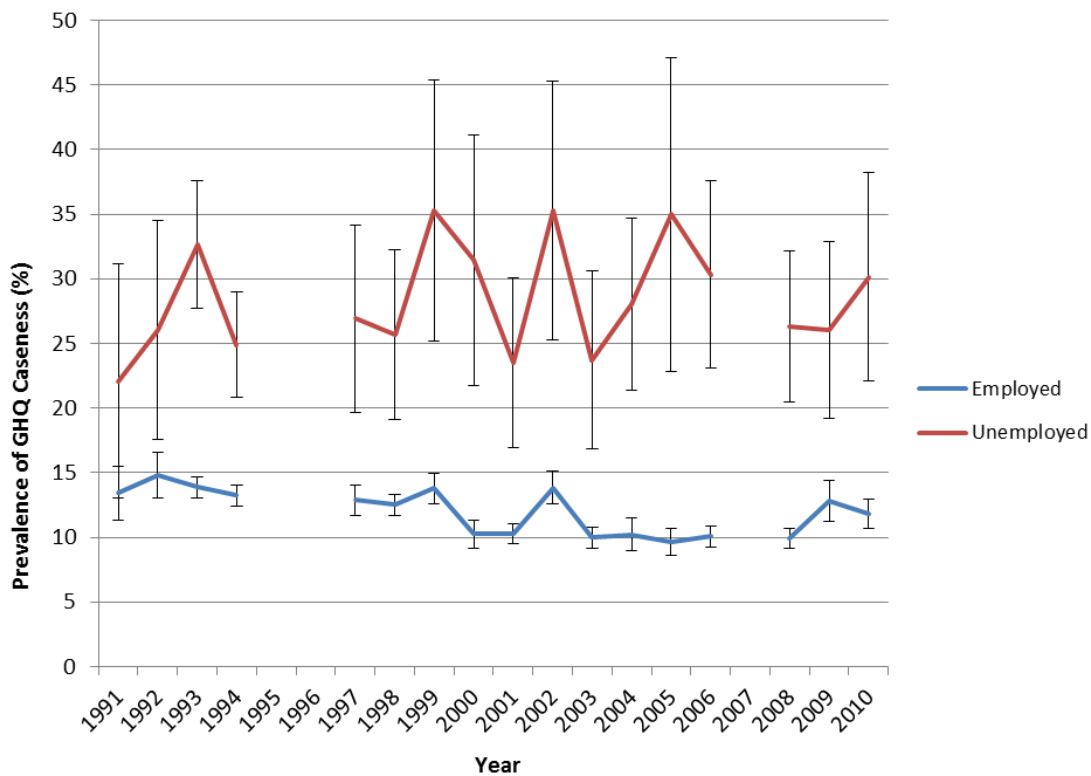

Figure 6: GHQ caseness by employment status 1991 to 2010

## References

1. CSDH. Closing the gap in a generation: Health equity through action on the social determinants of health. Final report of the Commission on Social Determinants of Health. Geneva: World Health Organization, 2008.
2. BBC News. Q&A: Lehman Brothers bank collapse 2008.
3. Stuckler D, Basu S, McKee M, Suhrcke M. Responding to the economic crisis: a primer for public health professionals. *Journal of Public Health* 2010;32(3):298-306.
4. Stuckler D, Basu S, Suhrcke M, McKee M. The health implications of financial crisis: A review of the evidence. *Ulster Med J* 2009;78(3):142-45.
5. Carrera S, Beaumont J. Income and wealth - Social Trends 41. In: Beaumont J, editor. London: Office for National Statistics, 2011.
6. Office for National Statistics. GDP and the Labour Market, 2012 Q1 - May GDP update. London, 2012.
7. Bambra C. *Work, Worklessness and the Political Economy of Health*. Oxford: Oxford University Press, 2011.
8. Bambra C, Pope D, Swami V, Stanistreet D, Roskam A, Kunst A, et al. Gender, health inequalities and welfare state regimes: a cross-national study of thirteen European countries. *J Epidemiol Community Health* 2009;63(1):jech-070292.
9. Roelfs DJ, Shor E, Davidson KW, Schwartz JE. Losing life and livelihood: A systematic review and meta-analysis of unemployment and all-cause mortality. *Social Science & Medicine* 2011;72(6):840-54.
10. Bezruchka S. The effect of economic recession on population health. *Canadian Medical Association Journal* 2009;181(5):281-85.
11. Bambra C. Yesterday once more? Unemployment and health in the 21st century. *Journal of Epidemiology and Community Health* 2010;64(3):213-15.
12. Minton JW, Pickett KE, Dorling D. Health, employment, and economic change, 1973-2009: repeated cross sectional study. *BMJ* 2012;344.
13. Office for National Statistics. Impact of the recession on the labour market. London, 2009.
14. Mindell J, Biddulph JP, Hirani V, Stamatakis E, Craig R, Nunn S, et al. Cohort Profile: The Health Survey for England. *International Journal of Epidemiology* 2012.
15. Aresu M, Boodhna G, Bryson A, Bridges S, Chaudhury M, Craig R, et al. Health Survey for England 2010. Volume 2: Methods and Documentation. In: Craig R, Mindell J, editors. London: National Centre for Social Research, 2011.
16. Bennett N, Dodd T, Flatley J, editors. *A survey carried out by the Social Survey Division of OPCS on behalf of the Department of Health*. London: HMSO, 1995. London, 1995.
17. Spence A. Labour Market - Social Trends 41. In: Beaumont J, editor. London: Office for National Statistics, 2011.
18. Office for National Statistics. Regional labour market statistics, January 2012. London, 2012.
19. Goldberg DP, Gater R, Sartorius N, Ustun TB, Piccinelli M, Gureje O, et al. The validity of two versions of the GHQ in the WHO study of mental illness in general health care. *Psychological Medicine* 1997;27(01):191-97.

- 1
  - 2
  - 3
  - 4
  - 5
  - 6
  - 7
  - 8
  - 9
  - 10
  - 11
  - 12
  - 13
  - 14
  - 15
  - 16
  - 17
  - 18
  - 19
  - 20
  - 21
  - 22
  - 23
  - 24
  - 25
  - 26
  - 27
  - 28
  - 29
  - 30
  - 31
  - 32
  - 33
  - 34
  - 35
  - 36
  - 37
  - 38
  - 39
  - 40
  - 41
  - 42
  - 43
  - 44
  - 45
  - 46
  - 47
  - 48
  - 49
  - 50
  - 51
  - 52
  - 53
  - 54
  - 55
  - 56
  - 57
  - 58
  - 59
  - 60
20. Goldberg D, Williams P. *A User's Guide to the General Health Questionnaire*. Windsor: NFER-Nelson, 1988.
21. Mood C. Logistic Regression: Why We Cannot Do What We Think We Can Do, and What We Can Do About It. *European Sociological Review* 2010;26(1):67-82.
22. Stuckler D, Basu S, Suhrcke M, Coutts A, McKee M. The public health effect of economic crises and alternative policy responses in Europe: an empirical analysis. *The Lancet*;374(9686):315-23.
23. Stuckler D, Basu S, Suhrcke M, Coutts A, McKee M. Effects of the 2008 recession on health: a first look at European data. *The Lancet*;378(9786):124-25.
24. Zivin K, Paczkowski M, Galea S. Economic downturns and population mental health: research findings, gaps, challenges and priorities. *Psychological Medicine*;FirstView:1-6.
25. Riva M, Bambra C, Easton S, Curtis S. Hard times or good times? Inequalities in the health effects of economic change. *International Journal of Public Health* 2011;56(1):3-5.
26. Gili M, Roca M, Basu S, McKee M, Stuckler D. The mental health risks of economic crisis in Spain: evidence from primary care centres, 2006 and 2010. *The European Journal of Public Health* 2012.
27. Heimo Viinamäki JH, Osmo Kontula, Leo Niskanen, Kaj Koskela. Mental health at population level during an economic recession in Finland. *Nordic Journal of Psychiatry* 2000;54(3):177-82.
28. Sandra H. Economic stability and health status: Evidence from East Asia before and after the 1990s economic crisis. *Health Policy* 2006;75(3):347-57.
29. Stuckler D, Basu S, McKee M. Budget crises, health, and social welfare programmes. *BMJ* 2010;340.
30. Uutela A. Economic crisis and mental health. *Current Opinion in Psychiatry* 2010;23(2):127-30 10.1097/YCO.0b013e328336657d.
31. Lundin A, Hemmingsson T. Unemployment and suicide. *The Lancet* 2009;374(9686):270-71.
32. Ferrie JE, Shipley MJ, Marmot MG, Stansfeld S, Smith GD. Health effects of anticipation of job change and non-employment: longitudinal data from the Whitehall II study. *BMJ* 1995;311(7015):1264-69.

Web Only Table A: Analysis of Data from 1991-2010 in Men Adjusted for Age, Employment Status and Education

| Model 1: Age                                 |      |       |              |              |              |       |              |              |
|----------------------------------------------|------|-------|--------------|--------------|--------------|-------|--------------|--------------|
| Year                                         | OR   | P     | Lower 95% CI | Upper 95% CI | % difference | P     | Lower 95% CI | Upper 95% CI |
| 1991                                         | 1.09 | 0.484 | 0.86         | 1.36         | 0.85         | 0.492 | -1.57        | 3.27         |
| 1992                                         | 1.30 | 0.013 | 1.06         | 1.59         | 2.91         | 0.018 | 0.50         | 5.31         |
| 1993                                         | 1.28 | 0.000 | 1.13         | 1.46         | 2.76         | 0.000 | 1.35         | 4.17         |
| 1994                                         | 1.15 | 0.040 | 1.01         | 1.31         | 1.49         | 0.038 | 0.08         | 2.89         |
| 1997                                         | 1.15 | 0.091 | 0.98         | 1.34         | 1.46         | 0.094 | -0.25        | 3.17         |
| 1998                                         | 1.17 | 0.029 | 1.02         | 1.34         | 1.65         | 0.028 | 0.17         | 3.13         |
| 1999                                         | 1.40 | 0.000 | 1.20         | 1.64         | 3.89         | 0.000 | 2.03         | 5.75         |
| 2000                                         | 1.04 | 0.624 | 0.88         | 1.23         | 0.43         | 0.625 | -1.31        | 2.17         |
| 2001                                         | 0.98 | 0.825 | 0.86         | 1.13         | -0.16        | 0.825 | -1.55        | 1.24         |
| 2002                                         | 1.29 | 0.003 | 1.09         | 1.52         | 2.79         | 0.004 | 0.91         | 4.68         |
| 2003                                         | 1.05 | 0.534 | 0.91         | 1.21         | 0.47         | 0.534 | -1.00        | 1.94         |
| 2004                                         | 1.00 | 0.963 | 0.83         | 1.22         | 0.05         | 0.963 | -1.88        | 1.97         |
| 2005                                         | 0.97 | 0.723 | 0.82         | 1.15         | -0.31        | 0.722 | -2.02        | 1.40         |
| 2006                                         | 1.06 | 0.465 | 0.91         | 1.22         | 0.56         | 0.465 | -0.95        | 2.08         |
| 2008                                         | 1.00 | -     | -            | -            | 0.00         | -     | -            | -            |
| 2009                                         | 1.53 | 0.000 | 1.26         | 1.86         | 5.07         | 0.000 | 2.60         | 7.55         |
| 2010                                         | 1.31 | 0.001 | 1.12         | 1.54         | 3.04         | 0.001 | 1.17         | 4.91         |
| Model 2: Age + Employment Status             |      |       |              |              |              |       |              |              |
| Year                                         | OR   | P     | Lower 95% CI | Upper 95% CI | % difference | P     | Lower 95% CI | Upper 95% CI |
| 1991                                         | 1.03 | 0.793 | 0.81         | 1.32         | 0.32         | 0.795 | -2.12        | 2.77         |
| 1992                                         | 1.19 | 0.108 | 0.96         | 1.48         | 1.83         | 0.119 | -0.47        | 4.14         |
| 1993                                         | 1.22 | 0.005 | 1.06         | 1.40         | 2.06         | 0.004 | 0.66         | 3.46         |
| 1994                                         | 1.07 | 0.308 | 0.94         | 1.23         | 0.72         | 0.306 | -0.66        | 2.09         |
| 1997                                         | 1.06 | 0.453 | 0.90         | 1.25         | 0.62         | 0.455 | -1.01        | 2.26         |
| 1998                                         | 1.12 | 0.128 | 0.97         | 1.29         | 1.12         | 0.127 | -0.32        | 2.55         |
| 1999                                         | 1.32 | 0.001 | 1.12         | 1.55         | 2.97         | 0.001 | 1.19         | 4.75         |
| 2000                                         | 0.95 | 0.549 | 0.80         | 1.13         | -0.50        | 0.547 | -2.13        | 1.13         |
| 2001                                         | 0.93 | 0.303 | 0.81         | 1.07         | -0.71        | 0.305 | -2.05        | 0.64         |
| 2002                                         | 1.26 | 0.007 | 1.06         | 1.50         | 2.46         | 0.009 | 0.62         | 4.30         |
| 2003                                         | 1.01 | 0.926 | 0.87         | 1.17         | 0.07         | 0.926 | -1.36        | 1.50         |
| 2004                                         | 0.99 | 0.959 | 0.82         | 1.20         | -0.05        | 0.959 | -1.90        | 1.80         |
| 2005                                         | 0.92 | 0.370 | 0.78         | 1.10         | -0.75        | 0.367 | -2.39        | 0.88         |
| 2006                                         | 1.05 | 0.511 | 0.91         | 1.22         | 0.49         | 0.511 | -0.98        | 1.96         |
| 2008                                         | 1.00 | -     | -            | -            | 0.00         | -     | 0.00         | 0.00         |
| 2009                                         | 1.50 | 0.000 | 1.24         | 1.82         | 4.54         | 0.000 | 2.23         | 6.86         |
| 2010                                         | 1.31 | 0.001 | 1.11         | 1.54         | 2.86         | 0.002 | 1.07         | 4.65         |
| Model 3: Age + Employment Status + Education |      |       |              |              |              |       |              |              |
| Year                                         | OR   | P     | Lower 95% CI | Upper 95% CI | % difference | P     | Lower 95% CI | Upper 95% CI |
| 1991                                         | 1.07 | 0.612 | 0.83         | 1.36         | 0.63         | 0.617 | -1.84        | 3.10         |
| 1992                                         | 1.22 | 0.069 | 0.98         | 1.51         | 2.07         | 0.079 | -0.24        | 4.37         |
| 1993                                         | 1.25 | 0.002 | 1.09         | 1.43         | 2.29         | 0.001 | 0.88         | 3.70         |
| 1994                                         | 1.10 | 0.184 | 0.96         | 1.26         | 0.94         | 0.182 | -0.44        | 2.32         |
| 1997                                         | 1.08 | 0.363 | 0.92         | 1.27         | 0.75         | 0.366 | -0.88        | 2.39         |
| 1998                                         | 1.13 | 0.086 | 0.98         | 1.31         | 1.26         | 0.085 | -0.17        | 2.69         |

|      |      |       |      |      |       |       |       |      |
|------|------|-------|------|------|-------|-------|-------|------|
| 1999 | 1.34 | 0.001 | 1.13 | 1.57 | 3.09  | 0.001 | 1.31  | 4.86 |
| 2000 | 0.96 | 0.607 | 0.81 | 1.13 | -0.43 | 0.606 | -2.05 | 1.20 |
| 2001 | 0.93 | 0.347 | 0.81 | 1.08 | -0.64 | 0.349 | -1.98 | 0.70 |
| 2002 | 1.27 | 0.007 | 1.07 | 1.50 | 2.48  | 0.008 | 0.64  | 4.31 |
| 2003 | 1.01 | 0.847 | 0.88 | 1.17 | 0.14  | 0.846 | -1.28 | 1.57 |
| 2004 | 1.00 | 0.989 | 0.83 | 1.21 | 0.01  | 0.989 | -1.83 | 1.86 |
| 2005 | 0.93 | 0.394 | 0.78 | 1.10 | -0.71 | 0.391 | -2.34 | 0.92 |
| 2006 | 1.05 | 0.506 | 0.91 | 1.22 | 0.50  | 0.506 | -0.96 | 1.95 |
| 2008 | 1.00 | -     | -    | -    | 0.00  | -     | -     | -    |
| 2009 | 1.50 | 0.000 | 1.24 | 1.82 | 4.52  | 0.000 | 2.21  | 6.83 |
| 2010 | 1.30 | 0.002 | 1.10 | 1.53 | 2.79  | 0.002 | 1.01  | 4.56 |

\* Reference group is 2008

CI = Confidence Interval

OR = Odds Ratio

P = P value

Web Only Table B: Analysis of Data from 1991-2010 in Women Adjusted for Age, Employment Status and Education

| Model 1: Age                     |      |       |              |              |              |       |              |              |
|----------------------------------|------|-------|--------------|--------------|--------------|-------|--------------|--------------|
| Year                             | OR   | P     | Lower 95% CI | Upper 95% CI | % difference | P     | Lower 95% CI | Upper 95% CI |
| 1991                             | 1.30 | 0.006 | 1.08         | 1.56         | 3.76         | 0.009 | 0.93         | 6.59         |
| 1992                             | 1.30 | 0.001 | 1.11         | 1.53         | 3.80         | 0.002 | 1.35         | 6.26         |
| 1993                             | 1.25 | 0.000 | 1.12         | 1.39         | 3.19         | 0.000 | 1.69         | 4.68         |
| 1994                             | 1.26 | 0.000 | 1.14         | 1.40         | 3.36         | 0.000 | 1.84         | 4.88         |
| 1997                             | 1.25 | 0.000 | 1.10         | 1.41         | 3.17         | 0.001 | 1.39         | 4.96         |
| 1998                             | 1.17 | 0.005 | 1.05         | 1.30         | 2.17         | 0.005 | 0.67         | 3.67         |
| 1999                             | 1.24 | 0.001 | 1.09         | 1.41         | 3.09         | 0.001 | 1.24         | 4.94         |
| 2000                             | 1.05 | 0.521 | 0.91         | 1.20         | 0.60         | 0.523 | -1.24        | 2.45         |
| 2001                             | 0.97 | 0.642 | 0.87         | 1.09         | -0.35        | 0.642 | -1.82        | 1.12         |
| 2002                             | 1.24 | 0.001 | 1.09         | 1.41         | 3.10         | 0.001 | 1.22         | 4.98         |
| 2003                             | 0.92 | 0.171 | 0.82         | 1.04         | -1.04        | 0.170 | -2.53        | 0.45         |
| 2004                             | 0.93 | 0.313 | 0.80         | 1.08         | -1.00        | 0.308 | -2.91        | 0.92         |
| 2005                             | 1.01 | 0.917 | 0.88         | 1.15         | 0.09         | 0.918 | -1.69        | 1.88         |
| 2006                             | 0.96 | 0.467 | 0.86         | 1.07         | -0.55        | 0.467 | -2.04        | 0.94         |
| 2008                             | 1.00 | -     | -            | -            | 0.00         | -     | -            | -            |
| 2009                             | 1.04 | 0.641 | 0.88         | 1.23         | 0.53         | 0.643 | -1.70        | 2.76         |
| 2010                             | 1.06 | 0.369 | 0.93         | 1.22         | 0.84         | 0.372 | -1.01        | 2.70         |
| Model 2: Age + Employment Status |      |       |              |              |              |       |              |              |
| Year                             | OR   | P     | Lower 95% CI | Upper 95% CI | % difference | P     | Lower 95% CI | Upper 95% CI |
| 1991                             | 1.29 | 0.007 | 1.07         | 1.55         | 3.57         | 0.010 | 0.86         | 6.28         |
| 1992                             | 1.31 | 0.002 | 1.11         | 1.55         | 3.77         | 0.003 | 1.29         | 6.25         |
| 1993                             | 1.24 | 0.000 | 1.11         | 1.38         | 2.95         | 0.000 | 1.49         | 4.42         |
| 1994                             | 1.26 | 0.000 | 1.13         | 1.41         | 3.25         | 0.000 | 1.76         | 4.73         |
| 1997                             | 1.20 | 0.003 | 1.06         | 1.36         | 2.54         | 0.004 | 0.81         | 4.27         |
| 1998                             | 1.15 | 0.014 | 1.03         | 1.28         | 1.83         | 0.013 | 0.38         | 3.29         |
| 1999                             | 1.21 | 0.003 | 1.07         | 1.38         | 2.63         | 0.004 | 0.85         | 4.41         |
| 2000                             | 1.02 | 0.766 | 0.89         | 1.17         | 0.27         | 0.766 | -1.49        | 2.02         |
| 2001                             | 0.94 | 0.308 | 0.84         | 1.06         | -0.74        | 0.308 | -2.17        | 0.69         |
| 2002                             | 1.22 | 0.002 | 1.07         | 1.39         | 2.73         | 0.003 | 0.93         | 4.52         |
| 2003                             | 0.92 | 0.170 | 0.82         | 1.04         | -1.02        | 0.170 | -2.47        | 0.44         |

| 2004                                                | 0.92 | 0.261 | 0.79         | 1.07         | -1.09        | 0.254 | -2.97        | 0.79         |
|-----------------------------------------------------|------|-------|--------------|--------------|--------------|-------|--------------|--------------|
| 2005                                                | 1.00 | 0.958 | 0.88         | 1.15         | 0.05         | 0.959 | -1.70        | 1.79         |
| 2006                                                | 0.95 | 0.342 | 0.85         | 1.06         | -0.70        | 0.341 | -2.13        | 0.74         |
| 2008                                                | 1.00 | -     | -            | -            | 0.00         | -     | -            | -            |
| 2009                                                | 1.06 | 0.522 | 0.90         | 1.24         | 0.70         | 0.526 | -1.48        | 2.89         |
| 2010                                                | 1.05 | 0.493 | 0.91         | 1.20         | 0.63         | 0.495 | -1.18        | 2.43         |
| <b>Model 3: Age + Employment Status + Education</b> |      |       |              |              |              |       |              |              |
| Year                                                | OR   | P     | Lower 95% CI | Upper 95% CI | % difference | P     | Lower 95% CI | Upper 95% CI |
| 1991                                                | 1.29 | 0.007 | 1.07         | 1.55         | 3.56         | 0.011 | 0.83         | 6.28         |
| 1992                                                | 1.31 | 0.002 | 1.11         | 1.55         | 3.79         | 0.003 | 1.31         | 6.26         |
| 1993                                                | 1.24 | 0.000 | 1.11         | 1.38         | 2.96         | 0.000 | 1.48         | 4.44         |
| 1994                                                | 1.26 | 0.000 | 1.14         | 1.41         | 3.26         | 0.000 | 1.77         | 4.76         |
| 1997                                                | 1.20 | 0.004 | 1.06         | 1.36         | 2.54         | 0.004 | 0.81         | 4.27         |
| 1998                                                | 1.15 | 0.013 | 1.03         | 1.28         | 1.85         | 0.013 | 0.39         | 3.30         |
| 1999                                                | 1.21 | 0.003 | 1.07         | 1.38         | 2.64         | 0.004 | 0.85         | 4.42         |
| 2000                                                | 1.02 | 0.752 | 0.89         | 1.17         | 0.28         | 0.753 | -1.47        | 2.04         |
| 2001                                                | 0.94 | 0.319 | 0.84         | 1.06         | -0.72        | 0.319 | -2.15        | 0.70         |
| 2002                                                | 1.22 | 0.002 | 1.07         | 1.39         | 2.75         | 0.003 | 0.96         | 4.55         |
| 2003                                                | 0.92 | 0.179 | 0.82         | 1.04         | -1.00        | 0.178 | -2.45        | 0.46         |
| 2004                                                | 0.92 | 0.263 | 0.79         | 1.07         | -1.09        | 0.257 | -2.97        | 0.79         |
| 2005                                                | 1.00 | 0.956 | 0.88         | 1.15         | 0.05         | 0.956 | -1.69        | 1.79         |
| 2006                                                | 0.95 | 0.344 | 0.85         | 1.06         | -0.69        | 0.344 | -2.13        | 0.74         |
| 2008                                                | 1.00 | -     | -            | -            | 0.00         | -     | -            | -            |
| 2009                                                | 1.06 | 0.523 | 0.90         | 1.24         | 0.70         | 0.527 | -1.48        | 2.88         |
| 2010                                                | 1.05 | 0.482 | 0.92         | 1.20         | 0.64         | 0.485 | -1.16        | 2.44         |

\* Reference group is 2008

CI = Confidence Interval

OR = Odds Ratio

P = P value

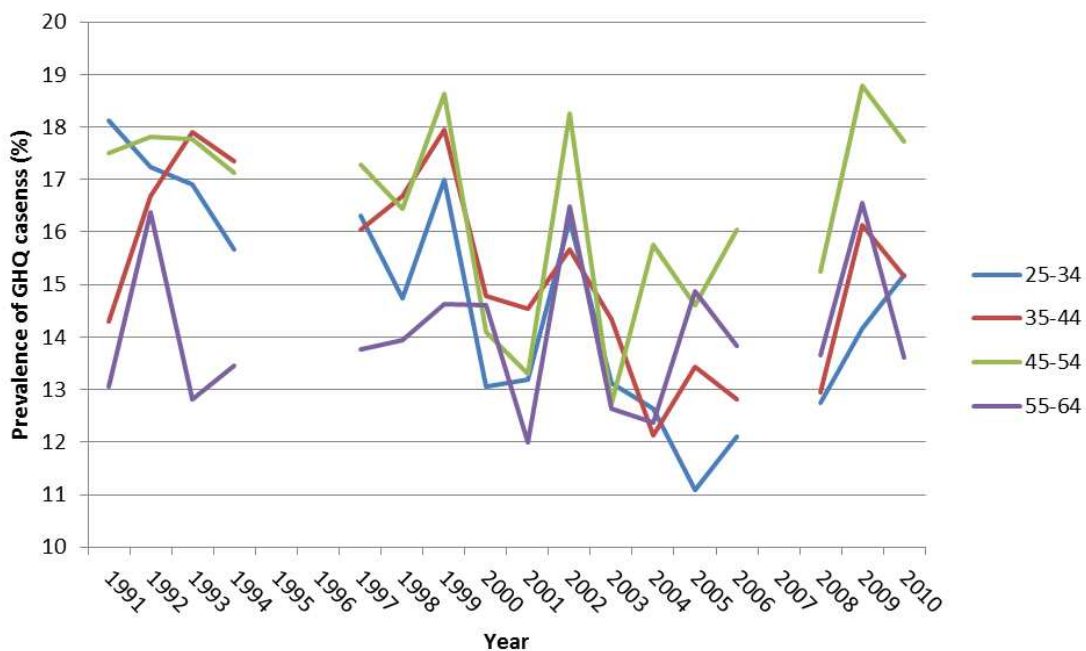

Web figure: Prevalence of GHQ caseness by age group 1991 to 2010

For peer review only

1  
2  
3  
4  
5  
6  
7  
8  
9  
10  
11  
12  
13  
14  
15  
16  
17  
18  
19  
20  
21  
22  
23  
24  
25  
26  
27  
28  
29  
30  
31  
32  
33  
34  
35  
36  
37  
38  
39  
40  
41  
42  
43  
44  
45  
46  
47  
48  
49  
50  
51  
52  
53  
54  
55  
56  
57  
58  
59  
60

## Unemployment Rate &amp; % GHQ caseness by gender

| Year | Unemployment Rate | Mean  | Both sexes   |              | Mean  | Male         |
|------|-------------------|-------|--------------|--------------|-------|--------------|
|      |                   |       | Lower 95% CI | Upper 95% CI |       | Lower 95% CI |
| 1991 | 8.85              | 15.90 | 13.92        | 17.87        | 12.26 | 10.04        |
| 1992 | 9.95              | 17.06 | 15.46        | 18.66        | 14.54 | 12.31        |
| 1993 | 10.38             | 16.55 | 15.81        | 17.29        | 14.13 | 13.20        |
| 1994 | 9.50              | 16.04 | 15.27        | 16.81        | 12.92 | 11.98        |
| 1995 | 8.63              |       |              |              |       |              |
| 1996 | 8.10              |       |              |              |       |              |
| 1997 | 6.95              | 15.97 | 14.93        | 17.01        | 12.83 | 11.48        |
| 1998 | 6.25              | 15.54 | 14.75        | 16.32        | 13.09 | 12.04        |
| 1999 | 5.98              | 17.19 | 16.04        | 18.33        | 15.24 | 13.70        |
| 2000 | 5.45              | 14.11 | 13.03        | 15.18        | 11.73 | 10.35        |
| 2001 | 5.10              | 13.33 | 12.61        | 14.05        | 11.25 | 10.33        |
| 2002 | 5.20              | 16.67 | 15.46        | 17.87        | 14.25 | 12.67        |
| 2003 | 5.03              | 13.24 | 12.46        | 14.02        | 11.80 | 10.77        |
| 2004 | 4.75              | 13.27 | 12.03        | 14.51        | 11.57 | 9.91         |
| 2005 | 4.88              | 13.42 | 12.38        | 14.46        | 10.98 | 9.63         |
| 2006 | 5.45              | 13.69 | 12.87        | 14.52        | 12.02 | 10.92        |
| 2007 | 5.35              |       |              |              |       |              |
| 2008 | 5.73              | 13.65 | 12.85        | 14.45        | 11.33 | 10.27        |
| 2009 | 7.65              | 16.40 | 14.94        | 17.86        | 16.57 | 14.28        |
| 2010 | 7.85              | 15.53 | 14.37        | 16.68        | 14.42 | 12.83        |



|    |              |       | Female       |              |
|----|--------------|-------|--------------|--------------|
|    | Upper 95% CI | Mean  | Lower 95% CI | Upper 95% CI |
| 8  |              |       |              |              |
| 9  | 14.48        | 19.53 | 16.84        | 22.22        |
| 10 | 16.77        | 19.58 | 17.23        | 21.92        |
| 11 | 15.07        | 18.96 | 17.90        | 20.02        |
| 12 | 13.86        | 19.16 | 18.05        | 20.27        |
| 13 |              |       |              |              |
| 14 | 14.18        | 19.11 | 17.65        | 20.58        |
| 15 | 14.13        | 17.99 | 16.91        | 19.06        |
| 16 | 16.79        | 19.13 | 17.56        | 20.70        |
| 17 | 13.12        | 16.48 | 14.94        | 18.01        |
| 18 | 12.17        | 15.40 | 14.37        | 16.44        |
| 19 | 15.83        | 19.08 | 17.50        | 20.67        |
| 20 | 12.84        | 14.68 | 13.62        | 15.74        |
| 21 | 13.22        | 14.98 | 13.35        | 16.61        |
| 22 | 12.34        | 15.86 | 14.42        | 17.31        |
| 23 | 13.11        | 15.37 | 14.30        | 16.44        |
| 24 |              |       |              |              |
| 25 | 12.39        | 15.97 | 14.91        | 17.03        |
| 26 | 18.85        | 16.23 | 14.25        | 18.21        |
| 27 | 16.01        | 16.63 | 15.11        | 18.16        |
| 28 |              |       |              |              |
| 29 |              |       |              |              |
| 30 |              |       |              |              |
| 31 |              |       |              |              |
| 32 |              |       |              |              |
| 33 |              |       |              |              |
| 34 |              |       |              |              |
| 35 |              |       |              |              |
| 36 |              |       |              |              |
| 37 |              |       |              |              |
| 38 |              |       |              |              |
| 39 |              |       |              |              |
| 40 |              |       |              |              |
| 41 |              |       |              |              |
| 42 |              |       |              |              |
| 43 |              |       |              |              |
| 44 |              |       |              |              |
| 45 |              |       |              |              |
| 46 |              |       |              |              |
| 47 |              |       |              |              |
| 48 |              |       |              |              |
| 49 |              |       |              |              |
| 50 |              |       |              |              |
| 51 |              |       |              |              |
| 52 |              |       |              |              |
| 53 |              |       |              |              |
| 54 |              |       |              |              |
| 55 |              |       |              |              |
| 56 |              |       |              |              |
| 57 |              |       |              |              |
| 58 |              |       |              |              |
| 59 |              |       |              |              |
| 60 |              |       |              |              |

STROBE Statement—checklist of items that should be included in reports of observational studies

## The Effects of the Recession on Population Mental Health: A Repeat Cross-Sectional Analysis of the Health Surveys of England

|                              | Item No | Recommendation                                                                                                                                                                                                                                                                                                                                                                                                                                                                                                                                                                                                                                                                                                                                               |
|------------------------------|---------|--------------------------------------------------------------------------------------------------------------------------------------------------------------------------------------------------------------------------------------------------------------------------------------------------------------------------------------------------------------------------------------------------------------------------------------------------------------------------------------------------------------------------------------------------------------------------------------------------------------------------------------------------------------------------------------------------------------------------------------------------------------|
| <b>Title and abstract</b>    | 1       | (a) Indicate the study's design with a commonly used term in the title or the abstract<br><b>Title</b><br>(b) Provide in the abstract an informative and balanced summary of what was done and what was found<br><b>Abstract</b>                                                                                                                                                                                                                                                                                                                                                                                                                                                                                                                             |
| <b>Introduction</b>          |         |                                                                                                                                                                                                                                                                                                                                                                                                                                                                                                                                                                                                                                                                                                                                                              |
| Background/rationale         | 2       | Explain the scientific background and rationale for the investigation being reported<br><b>Introduction, Paragraph 2</b>                                                                                                                                                                                                                                                                                                                                                                                                                                                                                                                                                                                                                                     |
| Objectives                   | 3       | State specific objectives, including any prespecified hypotheses<br><b>Introduction, Paragraph 3</b>                                                                                                                                                                                                                                                                                                                                                                                                                                                                                                                                                                                                                                                         |
| <b>Methods</b>               |         |                                                                                                                                                                                                                                                                                                                                                                                                                                                                                                                                                                                                                                                                                                                                                              |
| Study design                 | 4       | Present key elements of study design early in the paper<br><b>Methods, Paragraph 2</b>                                                                                                                                                                                                                                                                                                                                                                                                                                                                                                                                                                                                                                                                       |
| Setting                      | 5       | Describe the setting, locations, and relevant dates, including periods of recruitment, exposure, follow-up, and data collection<br><b>Methods, Paragraph 1</b>                                                                                                                                                                                                                                                                                                                                                                                                                                                                                                                                                                                               |
| Participants                 | 6       | (a) <i>Cohort study</i> —Give the eligibility criteria, and the sources and methods of selection of participants. Describe methods of follow-up<br><i>Case-control study</i> —Give the eligibility criteria, and the sources and methods of case ascertainment and control selection. Give the rationale for the choice of cases and controls<br><i>Cross-sectional study</i> —Give the eligibility criteria, and the sources and methods of selection of participants<br><b>Methods, Paragraph 3 and cited references therein</b><br>(b) <i>Cohort study</i> —For matched studies, give matching criteria and number of exposed and unexposed<br><i>Case-control study</i> —For matched studies, give matching criteria and the number of controls per case |
| Variables                    | 7       | Clearly define all outcomes, exposures, predictors, potential confounders, and effect modifiers. Give diagnostic criteria, if applicable<br><b>Methods, Paragraphs 3-5</b>                                                                                                                                                                                                                                                                                                                                                                                                                                                                                                                                                                                   |
| Data sources/<br>measurement | 8*      | For each variable of interest, give sources of data and details of methods of assessment (measurement). Describe comparability of assessment methods if there is more than one group<br><b>Methods, Paragraphs 3-5</b>                                                                                                                                                                                                                                                                                                                                                                                                                                                                                                                                       |
| Bias                         | 9       | Describe any efforts to address potential sources of bias<br><b>Methods, Paragraph 4 of Statistical Analysis</b>                                                                                                                                                                                                                                                                                                                                                                                                                                                                                                                                                                                                                                             |
| Study size                   | 10      | Explain how the study size was arrived at<br><b>Existing data analysis. Methods, Paragraph 3 and Table 1.</b>                                                                                                                                                                                                                                                                                                                                                                                                                                                                                                                                                                                                                                                |

|    |                        |                                                                                            |
|----|------------------------|--------------------------------------------------------------------------------------------|
| 1  |                        |                                                                                            |
| 2  | Quantitative variables | 11                                                                                         |
| 3  |                        | Explain how quantitative variables were handled in the analyses. If applicable,            |
| 4  |                        | describe which groupings were chosen and why                                               |
| 5  |                        | <b>Methods, Paragraphs 3-5</b>                                                             |
| 6  | Statistical methods    | 12                                                                                         |
| 7  |                        | (a) Describe all statistical methods, including those used to control for confounding      |
| 8  |                        | <b>Methods, Statistical Analysis section</b>                                               |
| 9  |                        | (b) Describe any methods used to examine subgroups and interactions                        |
| 10 |                        | <b>Methods, Statistical Analysis section</b>                                               |
| 11 |                        | (c) Explain how missing data were addressed                                                |
| 12 |                        | <b>Methods, Paragraph 3 (Population)</b>                                                   |
| 13 |                        | (d) <i>Cohort study</i> —If applicable, explain how loss to follow-up was addressed        |
| 14 |                        | <i>Case-control study</i> —If applicable, explain how matching of cases and controls was   |
| 15 |                        | addressed                                                                                  |
| 16 |                        | <i>Cross-sectional study</i> —If applicable, describe analytical methods taking account of |
| 17 |                        | sampling strategy                                                                          |
| 18 |                        | <b>Methods, Paragraph 4 of Statistical Analysis section</b>                                |
| 19 |                        | (e) Describe any sensitivity analyses                                                      |
| 20 |                        | <b>Methods, Paragraph 3</b>                                                                |
| 21 |                        |                                                                                            |
| 22 |                        |                                                                                            |
| 23 | Continued on next page |                                                                                            |
| 24 |                        |                                                                                            |
| 25 |                        |                                                                                            |
| 26 |                        |                                                                                            |
| 27 |                        |                                                                                            |
| 28 |                        |                                                                                            |
| 29 |                        |                                                                                            |
| 30 |                        |                                                                                            |
| 31 |                        |                                                                                            |
| 32 |                        |                                                                                            |
| 33 |                        |                                                                                            |
| 34 |                        |                                                                                            |
| 35 |                        |                                                                                            |
| 36 |                        |                                                                                            |
| 37 |                        |                                                                                            |
| 38 |                        |                                                                                            |
| 39 |                        |                                                                                            |
| 40 |                        |                                                                                            |
| 41 |                        |                                                                                            |
| 42 |                        |                                                                                            |
| 43 |                        |                                                                                            |
| 44 |                        |                                                                                            |
| 45 |                        |                                                                                            |
| 46 |                        |                                                                                            |
| 47 |                        |                                                                                            |
| 48 |                        |                                                                                            |
| 49 |                        |                                                                                            |
| 50 |                        |                                                                                            |
| 51 |                        |                                                                                            |
| 52 |                        |                                                                                            |
| 53 |                        |                                                                                            |
| 54 |                        |                                                                                            |
| 55 |                        |                                                                                            |
| 56 |                        |                                                                                            |
| 57 |                        |                                                                                            |
| 58 |                        |                                                                                            |
| 59 |                        |                                                                                            |
| 60 |                        |                                                                                            |

Continued on next page

1  
2  
3  
4  
5  
6  
7  
8  
9  
10  
11  
12  
13  
14  
15  
16  
17  
18  
19  
20  
21  
22  
23  
24  
25  
26  
27  
28  
29  
30  
31  
32  
33  
34  
35  
36  
37  
38  
39  
40  
41  
42  
43  
44  
45  
46  
47  
48  
49  
50  
51  
52  
53  
54  
55  
56  
57  
58  
59  
60

| <b>Results</b>           |     |                                                                                                                                                                                                                                                                                                                                                                                                                                                                                                                                              |
|--------------------------|-----|----------------------------------------------------------------------------------------------------------------------------------------------------------------------------------------------------------------------------------------------------------------------------------------------------------------------------------------------------------------------------------------------------------------------------------------------------------------------------------------------------------------------------------------------|
| Participants             | 13* | <p>(a) Report numbers of individuals at each stage of study—eg numbers potentially eligible, examined for eligibility, confirmed eligible, included in the study, completing follow-up, and analysed</p> <p><b>Table 1 and Methods, Paragraph 3 and cited references</b></p> <p>(b) Give reasons for non-participation at each stage</p> <p><b>Methods, Paragraph 3 and cited references</b></p> <p>(c) Consider use of a flow diagram</p> <p><b>Table 1</b></p>                                                                             |
| Descriptive data         | 14* | <p>(a) Give characteristics of study participants (eg demographic, clinical, social) and information on exposures and potential confounders</p> <p><b>Table 1</b></p> <p>(b) Indicate number of participants with missing data for each variable of interest</p> <p><b>Methods, Paragraph 3</b></p> <p>(c) <i>Cohort study</i>—Summarise follow-up time (eg, average and total amount)</p>                                                                                                                                                   |
| Outcome data             | 15* | <p><i>Cohort study</i>—Report numbers of outcome events or summary measures over time</p> <p><i>Case-control study</i>—Report numbers in each exposure category, or summary measures of exposure</p> <p><i>Cross-sectional study</i>—Report numbers of outcome events or summary measures</p> <p><b>Table 1 and Figures provided</b></p>                                                                                                                                                                                                     |
| Main results             | 16  | <p>(a) Give unadjusted estimates and, if applicable, confounder-adjusted estimates and their precision (eg, 95% confidence interval). Make clear which confounders were adjusted for and why they were included</p> <p><b>Tables 1-3</b></p> <p>(b) Report category boundaries when continuous variables were categorized</p> <p><b>Methods, Paragraph 5</b></p> <p>(c) If relevant, consider translating estimates of relative risk into absolute risk for a meaningful time period</p> <p><b>Reported in Tables 2-3 and main text.</b></p> |
| Other analyses           | 17  | <p>Report other analyses done—eg analyses of subgroups and interactions, and sensitivity analyses</p> <p><b>Provided in on-line appendix</b></p>                                                                                                                                                                                                                                                                                                                                                                                             |
| <b>Discussion</b>        |     |                                                                                                                                                                                                                                                                                                                                                                                                                                                                                                                                              |
| Key results              | 18  | <p>Summarise key results with reference to study objectives</p> <p><b>Discussion, Paragraph 1</b></p>                                                                                                                                                                                                                                                                                                                                                                                                                                        |
| Limitations              | 19  | <p>Discuss limitations of the study, taking into account sources of potential bias or imprecision. Discuss both direction and magnitude of any potential bias</p> <p><b>Discussion, Paragraph 2</b></p>                                                                                                                                                                                                                                                                                                                                      |
| Interpretation           | 20  | <p>Give a cautious overall interpretation of results considering objectives, limitations, multiplicity of analyses, results from similar studies, and other relevant evidence</p> <p><b>Discussion, Paragraph 3</b></p>                                                                                                                                                                                                                                                                                                                      |
| Generalisability         | 21  | <p>Discuss the generalisability (external validity) of the study results</p> <p><b>Discussion, Paragraph 4</b></p>                                                                                                                                                                                                                                                                                                                                                                                                                           |
| <b>Other information</b> |     |                                                                                                                                                                                                                                                                                                                                                                                                                                                                                                                                              |
| Funding                  | 22  | <p>Give the source of funding and the role of the funders for the present study and, if applicable, for the original study on which the present article is based</p>                                                                                                                                                                                                                                                                                                                                                                         |

**Funding statement provided**

\*Give information separately for cases and controls in case-control studies and, if applicable, for exposed and unexposed groups in cohort and cross-sectional studies.

**Note:** An Explanation and Elaboration article discusses each checklist item and gives methodological background and published examples of transparent reporting. The STROBE checklist is best used in conjunction with this article (freely available on the Web sites of PLoS Medicine at <http://www.plosmedicine.org/>, Annals of Internal Medicine at <http://www.annals.org/>, and Epidemiology at <http://www.epidem.com/>). Information on the STROBE Initiative is available at [www.strobe-statement.org](http://www.strobe-statement.org).

For peer review only



**Trends in Population Mental Health Before and After the 2008 Recession: A Repeat Cross-Sectional Analysis of the 1991-2010 Health Surveys of England**

|                                 |                                                                                                                                                                                                                                                                                                                                            |
|---------------------------------|--------------------------------------------------------------------------------------------------------------------------------------------------------------------------------------------------------------------------------------------------------------------------------------------------------------------------------------------|
| Journal:                        | <i>BMJ Open</i>                                                                                                                                                                                                                                                                                                                            |
| Manuscript ID:                  | bmjopen-2012-001790.R1                                                                                                                                                                                                                                                                                                                     |
| Article Type:                   | Research                                                                                                                                                                                                                                                                                                                                   |
| Date Submitted by the Author:   | 17-Aug-2012                                                                                                                                                                                                                                                                                                                                |
| Complete List of Authors:       | Katikireddi, Srinivasa; MRC/CSO Social & Public Health Sciences Unit, Evaluation of Social Interventions programme; NHS Lothian, Public Health and Health Policy<br>Niedzwiedz, Claire; Institute of Health and Wellbeing,<br>Popham, Frank; MRC/CSO Social & Public Health Sciences Unit, Social Patterning of Health Over the Lifecourse |
| <b>Primary Subject Heading</b>: | Public health                                                                                                                                                                                                                                                                                                                              |
| Secondary Subject Heading:      | Epidemiology, Sociology, Mental health, Health policy                                                                                                                                                                                                                                                                                      |
| Keywords:                       | SOCIAL MEDICINE, PUBLIC HEALTH, Depression & mood disorders < PSYCHIATRY, EPIDEMIOLOGY, MENTAL HEALTH, Anxiety disorders < PSYCHIATRY                                                                                                                                                                                                      |
|                                 |                                                                                                                                                                                                                                                                                                                                            |

SCHOLARONE™  
Manuscripts

1  
2  
3 **Trends in Population Mental Health Before and After the 2008 Recession: A**  
4 **Repeat Cross-Sectional Analysis of the 1991-2010 Health Surveys of England**  
5  
6

7 Srinivasa Vittal Katikireddi [1]\*  
8 Clinical Research Fellow  
9 Tel: +44 141 357 3949  
10 Fax: +44 141 337 2389  
11 E-mail: [ykatikireddi@sphsu.mrc.ac.uk](mailto:ykatikireddi@sphsu.mrc.ac.uk)  
12  
13

14 Claire L Niedzwiedz [2]  
15 Doctoral Student  
16

17 Frank Popham [1]  
18 Senior Investigator Scientist  
19

20  
21  
22 [1] MRC/CSO Social & Public Health Sciences Unit, 4 Lilybank Health Sciences  
23 Unit, Glasgow, G12 8RZ.  
24 \*Corresponding author  
25

26 [2] Institute of Health and Wellbeing, 1 Lilybank Gardens, University of Glasgow  
27  
28

29 **Funding**

30 SVK is funded by the Chief Scientist Office at the Scottish Health Directorate as part  
31 of the Evaluating Social Interventions programme at the MRC Social and Public  
32 Health Sciences Unit (MC\_US\_A540\_0013). FP is funded by the MRC (5TK10).  
33 CLN has received no funding for this study. The funders had no influence over the  
34 study design, data collection, analysis, interpretation of data, writing of the paper or  
35 decision to submit. The paper does not necessarily represent the views of the funding  
36 or employing organisations. SVK had full access to the data and take responsibility  
37 for the integrity of the data and the accuracy of analysis.  
38  
39

40 SVK acts as guarantor for this article.  
41

42 Data sharing: Additional results are available as a supplemental file from the BMJ  
43 website. The Health Surveys for England are available from the UK Data Archive.  
44  
45

46 Ethics approval: This study is an analysis of previously collected data and therefore  
47 ethical approval was not required for this study. Ethical approval for each survey was  
48 obtained by the Health Survey for England team.  
49

50 Word count (of main manuscript): 2,771  
51

52 **Competing Interest Statement**

53 All authors have completed the Unified Competing Interest form at  
54 [www.icmje.org/coi\\_disclosure.pdf](http://www.icmje.org/coi_disclosure.pdf) (available on request from the corresponding  
55 author) and declare that they have no conflicts of interest.  
56  
57  
58  
59  
60

1  
2  
3 Copyright Statement

4 The Corresponding Author has the right to grant on behalf of all authors and does  
5 grant on behalf of all authors, a [worldwide licence](#) to the Publishers and its licensees  
6 in perpetuity, in all forms, formats and media (whether known now or created in the  
7 future), to i) publish, reproduce, distribute, display and store the Contribution, ii)  
8 translate the Contribution into other languages, create adaptations, reprints, include  
9 within collections and create summaries, extracts and/or, abstracts of the  
10 Contribution, iii) create any other derivative work(s) based on the Contribution, iv) to  
11 exploit all subsidiary rights in the Contribution, v) the inclusion of electronic links  
12 from the Contribution to third party material where-ever it may be located; and, vi)  
13 licence any third party to do any or all of the above.  
14  
15  
16  
17  
18  
19  
20  
21  
22  
23  
24  
25  
26  
27  
28  
29  
30  
31  
32  
33  
34  
35  
36  
37  
38  
39  
40  
41  
42  
43  
44  
45  
46  
47  
48  
49  
50  
51  
52  
53  
54  
55  
56  
57  
58  
59  
60



## **Abstract**

**Objective:** To assess short-term differences in population mental health before and after the 2008 recession and explore how and why these changes differ by gender, age and socio-economic position.

**Design:** Repeat cross-sectional analysis of survey data

**Setting:** England

**Participants:** Representative samples of the working age (25-64 years) general population participating in the Health Survey for England between 1991 and 2010 inclusive.

**Main Outcome Measures:** Prevalence of poor mental health (caseness) as measured by the General Health Questionnaire-12 (GHQ)

**Results:** Age-sex standardised prevalence of GHQ caseness increased from 13.7% (95% CI 12.9-14.5%) in 2008 to 16.4% (95% CI 14.9-17.9%) in 2009 and 15.5% (95% CI 14.4-16.7%) in 2010. Women had a consistently greater prevalence since 1991 until the current recession. However, compared to 2008, men experienced an increase in age-adjusted caseness of 5.1% (95% CI 2.6-7.6%,  $p<0.001$ ) in 2009 and 3.0% (95% CI 1.2-4.9%,  $p=0.001$ ) in 2010, while no statistically significant changes were seen in women. Adjustment for differences in employment status and education level did not account for the observed increase in men nor did they explain the differential gender patterning. Over the last decade, socio-economic inequalities showed a tendency to increase but no clear evidence for an increase in inequalities associated with the recession was found. Similarly, no evidence was found for a differential effect between age groups.

**Conclusions:** Population mental health in men has deteriorated within two years of the onset of the current recession. These changes, and their patterning by gender, could not be accounted for by differences in employment status. Further work is needed to monitor recessionary impacts on health inequalities in response to ongoing labour market and social policy changes.

Words: 275

### **What is already known on this subject?**

Previous studies have found differing impacts of recession on mental health, with some outcomes, such as suicide, increasing in men more than women. However, as the labour market changes and employment among women becomes increasingly important, it has been suggested that this gender difference may no longer exist. Few studies have investigated mental health morbidity and its patterning by population subgroups over prolonged periods of time.

### **What this study adds**

There has been an increase in the prevalence of poor mental health among men in England in the two years after the start of the current recession. These changes, and their patterning by gender, cannot be accounted for by differences in employment status over time.

### Article Focus

- Previous studies have found differing impacts of recession on mental health, with some deteriorations in health outcomes (such as suicide) being worse in men than women.
- Few studies have investigated mental health morbidity and its patterning by population subgroups over prolonged periods of time.
- We assess short-term changes in population mental health and inequalities (by gender, age and socio-economic position) following the recent recession, by placing it in a longer historical context.

### Key Messages

- Population mental health in men has deteriorated within two years of the onset of the current recession.
- These changes in population mental health, and their patterning by gender, cannot be accounted for by differences in employment status over time.

### Strengths & Limitations

- Our study uses a large nationally representative dataset to assess trends over a long length of time and an outcome likely to be sensitive to changes in the macro-economic environment.
- We assess trends across a number of dimensions (and measures) of inequality, helping to address an important gap in the current literature.
- Establishing causality from this research is difficult given the cross-sectional (rather than longitudinal) nature of the surveys and lack of available data for some time periods.

## **Introduction**

Macro-economic factors are known to influence population health and health inequalities<sup>1</sup>. The onset of the global economic downturn heralded by the collapse of Lehman Brothers in September 2008 can therefore be considered a potential threat to public health<sup>2-4</sup>. In the UK, national gross domestic product (GDP) has fallen in real terms (with a 5.5% fall per head of population between 2008 and 2009) and unemployment rates have increased since the recession began<sup>5</sup>. Neither indicator has yet recovered to pre-recession levels at the time of writing<sup>6</sup>. Unemployment is associated with a number of adverse health impacts including poor mental health, short-term increases in adverse health behaviours and increased mortality risk<sup>7-9</sup>. However, the effects of recession appear to be more complex than would be expected from the impact of increases in unemployment alone. For example, there is a growing body of research suggesting that at least in the short term, recessions are associated with a faster decline in mortality although some specific causes of death, such as suicide, may rise<sup>10</sup>. Thus, mortality impacts of recessions may be more complex than intuition suggests and likely vary by outcome and context<sup>4,7</sup>.

Less empirical analysis has focused on the effect of recession on trends in population mental health. Macro-economic change could potentially have a more rapid effect on mental health compared to mortality, particularly for those of working age. Historically, both periods of recession and unemployment appear to have had a greater impact on men compared to women<sup>7</sup>. However, it has been suggested that this differential impact may no longer be present as growing female labour market participation may increase their susceptibility to macro-economic changes<sup>11,12</sup>. In addition, it is not clear to what extent changes in health status associated with recessionary periods are mediated purely through changes in labour market status. The UK experienced its first recession since 1991 (defined as two quarters of negative growth in gross domestic product) in late 2008<sup>13</sup>. Unemployment (which is commonly used as a marker of recession that has a more direct effect on health) showed marked increases between 1991-3 and 2008-10.

In this paper, we aim to assess short-term changes in population mental health and inequalities (by gender, age and socio-economic position) following the onset of the recent recession by placing it in a longer historical context. We further aim to investigate to what extent any observed associations and their patterning by subgroups can be accounted for by differences in employment status and education level.

## **Methods**

### **Data sources**

We used data from the Health Survey for England, a nationally representative cross-sectional survey of the community dwelling population, conducted annually from 1991 onwards. Survey methodology has been described elsewhere<sup>14-16</sup>. Household response rates for the period studied varied from 85% in 1991 to 64% in 2008.

Unemployment rates (available for the whole period) and gross GDP per head (comparable data available for 1991-2009) for the UK were retrieved to provide

1  
2  
3 context for the interpretation of trends<sup>5 17</sup>. In addition, unemployment data for  
4 England (available for 1993 onwards) were retrieved and showed similar trends to the  
5 UK data<sup>18</sup>. These macro-economic indicators all show marked deterioration between  
6 2008 and 2009; hence we use 2008 as the reference year for comparison.  
7  
8

### 9 10 Population

11 The general population samples from the Health Surveys for England were used for  
12 all analyses. The study population was restricted to participants of a working age,  
13 between 25 years and 64 years inclusive. Those aged under 25 years were excluded to  
14 minimise misclassification of education level. Participants missing any data on age,  
15 sex, highest education level, employment status and outcome were excluded from the  
16 analysis (5.15% of total sample excluded). We excluded 2918 participants (2.59% of  
17 the sample) with foreign/other qualifications as we were unable to categorise their  
18 highest educational attainment accurately. We excluded 847 individuals (0.75%) who  
19 defined themselves as doing unpaid work for their family, waiting to take up  
20 employment or undertaking government training schemes. Results of overall  
21 prevalence estimates were similar when those with missing data (apart from the  
22 1.60% missing outcome data) were included. Similar results were also obtained when  
23 the population was limited to those aged 25-59 years, to investigate the potential for  
24 gender differentials arising from a younger age of retirement among women.  
25  
26  
27

### 28 29 Exposures

30 Socio-economic position was assessed using highest education level (self-reported)  
31 and area-level deprivation. Comparable information on education level was available  
32 for every survey year except 1995 and 1996 and area-level deprivation was available  
33 from 2001 onwards. Educational level was coded into four categories: degree-level or  
34 equivalent qualifications, A-level or equivalent, GCSE or equivalent and no  
35 qualifications, while the index of multiple deprivation (IMD) was coded into  
36 quintiles. Participants were asked to self-identify their employment status based on  
37 their activity in the previous week before the survey interview. Employment status  
38 was coded into six categories: employed, unemployed, unable to work due to ill  
39 health, looking after family/maternity care, retired and in full-time education.  
40 Equivalised household income (coded into quintiles and in a sensitivity analysis as a  
41 continuous variable) was analysed for the years 2000 onwards in an exploratory  
42 analysis.  
43  
44

### 45 46 Outcome Measures

47 Mental health was assessed in every survey year except 1996 and 2007 through the  
48 general health questionnaire (GHQ-12). GHQ-12 is a screening tool for anxiety and  
49 depression, validated for use in epidemiological studies<sup>19</sup>. Respondents scoring 4 or  
50 more have a high likelihood of poor mental health and are considered a 'case'<sup>20</sup>.  
51

### 52 53 Statistical Analysis

54 For the first stage of analysis, we analysed data for each year separately. Prevalence  
55 estimates for GHQ caseness (age-sex standardisation to the WHO European standard  
56 population) were calculated for each year, stratified by age, sex, education level and  
57 employment status.  
58  
59  
60

1  
2  
3 In the second stage of analysis, logistic regression analysis was conducted for each  
4 year separately to explore any differential patterning in recession years between men  
5 and women. To measure the extent of socio-economic inequality in prevalence on a  
6 relative scale we calculated the relative index of inequality using a Poisson modelling  
7 approach [15].  
8

9  
10 We directly tested the impact of the recent recession in the final stage of the analysis  
11 by creating a combined dataset for all years and creating a logistic regression model  
12 adjusting for year, age, education level and employment status. Men and women were  
13 analysed separately given the effect modification observed between genders and year.  
14 A final stage of analysis investigated if equivalised household income helped explain  
15 differences in GHQ prevalence before and after the recession.  
16

17  
18 All analyses were carried out using Stata v11.2. Weights for non-response (available  
19 from 2003 onwards) were used for all analyses. These were scaled to a mean of 1 for  
20 each year to allow analysis of the combined dataset. Robust standard errors were used  
21 to adjust for survey clustering at the area level. Adjusted prevalence differences were  
22 derived from the logistic regression models as well as odds ratios in order to allow  
23 comparisons across models to be made on the absolute scale <sup>21</sup>.  
24

## 25 26 **Results**

27  
28 A total of 106,985 participants were included in the main analysis of trends in GHQ  
29 caseness (Table 1). The sample response rate declined gradually over time, but they  
30 were broadly comparable over the most recent years with no marked changes in  
31 response rates during the onset of the current recession. There was also socio-  
32 economic change with a decline in the percentage of people with no qualifications and  
33 an increase in participants with a degree.  
34

35  
36 GHQ caseness was relatively high during the time of the early 1990s recession  
37 (Figure 1). Since then, there has been an indication of a general downward trend with  
38 some variability, until a more recent increase in prevalence that occurs after 2008.  
39 Caseness increased from 13.7% (95% CI 12.9-14.5%) in 2008 to 16.4% (95% CI  
40 14.9-17.9%) in 2009.  
41

## 42 43 **Impact by Subgroups**

44  
45 A gender differential in GHQ caseness is apparent; women have a consistently higher  
46 prevalence over most of the time period (Figure 2). However, during the early 1990s  
47 recession, men had a larger increase in prevalence of GHQ caseness from 12.3% in  
48 1991 to 14.5% in 1992. A similar trend is seen following the 2008 recession with an  
49 increase from 11.3% to 16.6% in men, compared to 16.0% to 16.2% in women  
50 between 2008 and 2009.  
51

52  
53 Stratified analysis by age shows that changes in mental health during recessionary  
54 periods are not confined to any specific age groups (see on-line appendix). Sensitivity  
55 analysis including those aged 16-24 years showed no clear difference in trends.  
56  
57  
58  
59  
60

1  
2  
3 In the early 1990s, stratification by education level reveals an initial reverse education  
4 gradient in GHQ caseness (Figure 3). Over time, a growing disparity in GHQ  
5 caseness between those most and least educated is apparent, with the highest levels of  
6 inequality in poor mental health observed in 2005. A similar pattern is seen when  
7 assessing caseness by area-level deprivation (Figure 4). The greatest levels of relative  
8 indices of inequality are also seen since 2005 when assessed by either measure of  
9 socio-economic position (Figure 5). No significant differences before and after the  
10 recession by area-level deprivation are observed.  
11

12  
13 Changes in population mental health do not appear to be entirely mediated by changes  
14 in employment status. For example, the prevalence of GHQ caseness amongst those in  
15 employment increased during both recessionary periods: from 13.4% (95% CI 11.4-  
16 15.5%) to 14.8% (95% CI 13.1-16.6%) in 1991-2 and from 9.9% (95% CI 9.2-10.7%)  
17 to 12.9% (11.3-14.4%) between 2008 and 2009 (Figure 6).  
18  
19

### 20 21 **Exploration of the Differential Trends by Gender**

22  
23 A combined dataset for all years was analysed separately for men and women, given  
24 the effect modification observed. Compared to a baseline of 2008, age-adjusted  
25 caseness increased by 5.1% (95% 2.6-7.6%,  $p < 0.001$ ) in 2009 and 3.0% (95% 1.2-  
26 4.9%,  $p = 0.001$ ) in 2010 amongst men but no statistically significant changes are seen  
27 in women (Table 2 and Web Tables A-B). Adding employment status to the model  
28 suggests that changes in employment status do not explain this increase in poor  
29 mental health. Similarly, adjustment for changes in employment status and education  
30 level does not account for this increase in prevalence. Finally, adjustment for  
31 equivalised household income in a post-hoc exploratory analysis also did not explain  
32 changes in prevalence (see Web Table C).  
33  
34

35 We attempted to explore the reasons for the adverse changes in the years following  
36 the recession among men. When analysing data from each year separately, adjustment  
37 for differences in education level and employment status between genders did not  
38 account for the larger increase in prevalence amongst men (see Table 3). Therefore,  
39 the differing trend in mental health in men appears not to be explained by differing  
40 changes in labour market status.  
41  
42

### 43 44 **Discussion**

45  
46 In this large repeat cross-sectional study of representative samples of the English  
47 population, we have found evidence to suggest population mental health has  
48 deteriorated in men following the start of the 2008 recession. Notably, this change  
49 does not appear to arise only as a result of an increase in unemployment, but mental  
50 health appears to have declined among those in employment. Household income also  
51 does not account for the observed trend in mental health. While some commentators  
52 have recently suggested that the current recession may affect both genders in a similar  
53 manner, we find that the deterioration in mental health appears only amongst men.  
54 Furthermore, this differential association cannot be adequately accounted for by  
55 changes in employment status (such as greater unemployment) amongst men. We also  
56 find evidence to suggest that socio-economic inequalities (assessed by both highest  
57  
58  
59  
60

1  
2  
3 education level and area-level deprivation) have increased over the course of the last  
4 decade, but the recession had not been associated with a widening of socio-economic  
5 inequalities in mental health by the year 2010.  
6

7  
8 Our study has a number of strengths. We used a large nationally representative dataset  
9 which used a validated screening test for anxiety and depression. Importantly, we  
10 assessed trends over a long length of time with annual measures available for most of  
11 the period and an outcome likely to be sensitive to changes in the macro-economic  
12 environment. This allows greater certainty in attribution compared to studies limited  
13 to comparisons of single before and after surveys.  
14

15  
16 As our study makes use of available data, a number of important limitations exist.  
17 First, data was not available for every year, with the omission of GHQ in 2007  
18 potentially problematic as this represents the last full pre-recessionary year. Second,  
19 we have been limited to repeat cross-sectional analysis. Longitudinal analysis of  
20 individuals would allow greater scope for relating changes in individual employment  
21 status to health. Third, while we have chosen a validated outcome measure, it is  
22 possible that framing effects could account for some of the observed changes. In  
23 particular, GHQ items were asked first in the self-completion questionnaire in 1999,  
24 2002 and 2009, all years with a high prevalence. However, the higher prevalence  
25 following 2008 among men remains in 2010. Fourth, defining recessionary periods  
26 and exploring their effects are notoriously difficult. We have studied changes over  
27 time period but did not directly incorporate macro-economic measures into our  
28 analysis. In addition, we have only been able to investigate a few of the potential  
29 pathways between recession and mental health. Further work is needed to explore  
30 other pathways such as temporary employment and increased job insecurity. Lastly,  
31 although our study has investigated changes in population mental health associated  
32 with the recession, we cannot establish whether this is a causal relationship, as other  
33 temporal changes could account for the observed trends. However, many factors that  
34 could potentially account for our findings, such as changes in health or social care  
35 provision, could also be considered mediating factors rather than confounders.  
36  
37

38  
39 Much previous research has focussed on mortality, and in particular suicide,  
40 associated with recession. In an analysis of cause-specific mortality and its association  
41 with recession in European countries, Stuckler et al. found that the most consistently  
42 observed relationship was an increase in suicide amongst young men<sup>22</sup>. More  
43 recently, they found that increases in suicide rates have been observed across  
44 European countries following the onset of the current recession<sup>23</sup>. Consistent  
45 increases in male suicide rates have been noted in many other studies<sup>24</sup>. The  
46 relationships between morbidity in mental health, health inequalities and recessions  
47 are less well understood and findings differ between studies<sup>7,25</sup>. A recent before and  
48 after comparison of patients attending primary care services in Spain found a marked  
49 increase in the prevalence of mental health disorders following the onset of the  
50 current global recession<sup>26</sup>. Household unemployment and mortgage difficulties were  
51 particularly associated with these attendances. However, not all studies have found a  
52 negative association between economic recession and mental health. For example,  
53 Vinamaki et al found no statistically significant increase in poor mental health  
54 (assessed using GHQ) following the economic recession in Finland between 1993 to  
55 1995 in repeated general population samples<sup>27</sup>.  
56  
57  
58  
59  
60

1  
2  
3 While our study finds men's mental health has declined while women's has not, it  
4 should be noted that important indirect effects of the recession, including changes in  
5 the public sector workforce and changes in government assistance for children, had  
6 yet to be implemented during the time of this study. Our analysis does not yet show  
7 any indication of worsening mental health inequalities associated with the current  
8 recession. However, there is a general trend towards a greater level of inequality more  
9 recently and there is no evidence to suggest narrowing. Further research will be  
10 required to assess ongoing impacts of the recession by gender and socio-economic  
11 position. As our analysis was restricted to a working-age population, research  
12 focussing on retired individuals is also needed to investigate the potential impact in  
13 older age groups. The existing evidence suggests that the relationship between mental  
14 health and recessions differs, at least in part, by social welfare system<sup>10 22 28-31</sup>. There  
15 is therefore a need for cross-national comparisons of trends in population health and  
16 health inequalities to better identify social policy responses that protect from any  
17 adverse health impacts of recession.  
18  
19

20  
21 The finding that mental health across the general population has deteriorated  
22 following the recession's onset, and this association does not appear to be limited to  
23 those out of employment nor those whose household income has declined, has  
24 important implications. Previous research has highlighted the importance of job  
25 insecurity, rather than solely employment status, as potentially resulting in adverse  
26 effects on mental health<sup>32</sup>. One potential explanation for our results would be that job  
27 insecurity during the current recession is responsible for the deterioration in mental  
28 health with men's psychological health remaining more affected by economic  
29 fluctuations despite greater female labour market participation. This paper highlights  
30 the continuing importance of addressing mental health issues using population-wide  
31 approaches by both policymakers and health professionals and not limiting such  
32 efforts to those directly affected by unemployment.  
33  
34  
35  
36  
37  
38

### 39 Acknowledgements

40 We would like to acknowledge the assistance of the UK Data Archive for providing  
41 access to the data; the Information Centre for health and social care and Department  
42 of Health for sponsoring the Health Survey for England; and the Principal  
43 Investigators of the Health Survey for England, Natcen Social Research and the  
44 Department of Epidemiology and Public Health at the Royal Free and University  
45 College Medical School. In addition, we would like to thank Geoff Der at the  
46 MRC/CSO Social & Public Health Sciences Unit for providing statistical advice. The  
47 responsibility for the analysis presented here lies solely with the authors.  
48  
49  
50  
51  
52  
53  
54  
55  
56  
57  
58  
59  
60



1  
2  
3  
4  
5  
6  
7  
8  
9  
10  
11  
12  
13  
14  
15  
16  
17  
18  
19  
20  
21  
22  
23  
24  
25  
26  
27  
28  
29  
30  
31  
32  
33  
34  
35  
36  
37  
38  
39  
40  
41  
42  
43  
44  
45  
46  
47  
48  
49

Table 1: characteristics of study participants

| Year | Sex (%) |      | Age group (%) |       |       |       | Highest education level (%) |         |      |      | Employment status in last week (%) |            |                               |         |                    | Sample | Response rate (%) |              |
|------|---------|------|---------------|-------|-------|-------|-----------------------------|---------|------|------|------------------------------------|------------|-------------------------------|---------|--------------------|--------|-------------------|--------------|
|      | M       | F    | 25-34         | 35-44 | 45-54 | 55-64 | Degree                      | A-level | GCSE | None | Employed                           | Unemployed | Not working due to ill health | Retired | Looking after home |        |                   | In education |
| 1991 | 46.7    | 53.3 | 29.8          | 27.5  | 21.8  | 20.8  | 11.8                        | 18.7    | 33.4 | 36.0 | 71.9                               | 5.5        | 4.5                           | 4.5     | 13.1               | 0.5    | 2,001             | 85           |
| 1992 | 47.3    | 52.7 | 29.2          | 28.4  | 22.6  | 19.8  | 11.8                        | 22.0    | 35.6 | 30.6 | 69.3                               | 6.1        | 4.4                           | 6.1     | 13.0               | 1.1    | 2,484             | 82           |
| 1993 | 47.5    | 52.5 | 29.7          | 26.6  | 24.3  | 19.4  | 12.8                        | 21.7    | 33.3 | 32.2 | 70.9                               | 6.3        | 4.3                           | 5.5     | 12.4               | 0.6    | 10,502            | 81           |
| 1994 | 46.7    | 53.3 | 30.2          | 27.3  | 23.1  | 19.5  | 13.0                        | 21.9    | 34.4 | 30.7 | 70.9                               | 5.5        | 4.5                           | 5.8     | 12.4               | 1.0    | 9,981             | 77           |
| 1997 | 47.2    | 52.8 | 29.1          | 27.4  | 25.0  | 18.5  | 16.4                        | 24.8    | 31.2 | 27.6 | 71.7                               | 3.3        | 6.4                           | 4.8     | 12.8               | 1.1    | 5,377             | 76           |
| 1998 | 46.6    | 53.4 | 28.4          | 27.5  | 25.2  | 18.9  | 16.6                        | 24.1    | 33.0 | 26.3 | 73.4                               | 2.0        | 6.1                           | 5.4     | 11.6               | 1.4    | 9,748             | 74           |
| 1999 | 46.9    | 53.1 | 26.5          | 29.0  | 25.6  | 18.9  | 18.0                        | 25.0    | 31.1 | 26.0 | 72.3                               | 2.3        | 6.6                           | 5.1     | 12.3               | 1.4    | 4,750             | 76           |
| 2000 | 45.8    | 54.2 | 26.8          | 30.3  | 23.3  | 19.6  | 18.9                        | 27.3    | 31.0 | 22.8 | 72.3                               | 2.1        | 6.6                           | 5.8     | 11.6               | 1.6    | 4,982             | 75           |
| 2001 | 45.7    | 54.3 | 24.9          | 29.6  | 25.3  | 20.2  | 19.6                        | 26.1    | 32.6 | 21.6 | 73.3                               | 2.0        | 6.4                           | 6.2     | 10.3               | 1.7    | 9,457             | 74           |
| 2002 | 43.4    | 56.6 | 25.7          | 31.8  | 22.7  | 19.8  | 21.0                        | 27.9    | 32.7 | 18.5 | 71.4                               | 2.1        | 5.6                           | 6.0     | 13.6               | 1.4    | 4,619             | 74           |
| 2003 | 45.4    | 54.6 | 23.3          | 29.7  | 23.8  | 23.2  | 21.8                        | 25.8    | 32.5 | 19.8 | 74.6                               | 1.6        | 6.1                           | 6.3     | 10.2               | 1.4    | 8,982             | 73           |
| 2004 | 43.4    | 56.6 | 22.5          | 29.2  | 23.6  | 24.8  | 23.0                        | 25.7    | 29.8 | 21.5 | 73.0                               | 1.4        | 5.9                           | 7.4     | 10.7               | 1.6    | 4,076             | 72           |
| 2005 | 44.8    | 55.2 | 22.5          | 26.6  | 26.5  | 24.4  | 23.6                        | 25.9    | 30.1 | 20.5 | 73.8                               | 1.7        | 6.3                           | 6.2     | 10.6               | 1.4    | 4,590             | 74           |
| 2006 | 44.7    | 55.3 | 21.2          | 28.8  | 24.9  | 25.2  | 25.5                        | 26.8    | 29.2 | 18.5 | 73.9                               | 1.8        | 5.9                           | 6.8     | 10.3               | 1.3    | 8,605             | 68           |
| 2008 | 44.7    | 55.3 | 22.0          | 27.5  | 25.2  | 25.3  | 25.6                        | 28.0    | 28.7 | 17.7 | 74.0                               | 2.1        | 5.4                           | 7.4     | 9.6                | 1.6    | 9,228             | 64           |
| 2009 | 45.6    | 54.4 | 21.7          | 28.8  | 25.0  | 24.6  | 26.4                        | 25.6    | 30.9 | 17.0 | 73.4                               | 3.1        | 5.5                           | 7.4     | 9.0                | 1.7    | 2,773             | 68           |
| 2010 | 43.5    | 56.5 | 21.3          | 26.5  | 27.6  | 24.6  | 28.2                        | 28.3    | 29.7 | 13.9 | 73.1                               | 3.1        | 5.8                           | 7.4     | 9.0                | 1.6    | 4,830             | 66           |

Table 2: Analysis of Data from 1991-2010 in Men and Women Adjusted for Age, Employment Status and Education (Selected Years Shown)

|                | Model 1: Age |       |              |              | Model 2: Age + Employment Status |       |              |              | Model 3: Age + Employment Status + Education |       |              |              |
|----------------|--------------|-------|--------------|--------------|----------------------------------|-------|--------------|--------------|----------------------------------------------|-------|--------------|--------------|
| <b>Males</b>   |              |       |              |              |                                  |       |              |              |                                              |       |              |              |
| Year           | OR           | P     | Lower 95% CI | Upper 95% CI | OR                               | P     | Lower 95% CI | Upper 95% CI | OR                                           | P     | Lower 95% CI | Upper 95% CI |
| 2005           | 0.97         | 0.723 | 0.82         | 1.15         | 0.92                             | 0.370 | 0.78         | 1.10         | 0.93                                         | 0.394 | 0.78         | 1.10         |
| 2006           | 1.06         | 0.465 | 0.91         | 1.22         | 1.05                             | 0.511 | 0.91         | 1.22         | 1.05                                         | 0.506 | 0.91         | 1.22         |
| 2008           | 1.00         | -     | -            | -            | 1.00                             | -     | -            | -            | 1.00                                         | -     | -            | -            |
| 2009           | 1.53         | 0.000 | 1.26         | 1.86         | 1.50                             | 0.000 | 1.24         | 1.82         | 1.50                                         | 0.000 | 1.24         | 1.82         |
| 2010           | 1.31         | 0.001 | 1.12         | 1.54         | 1.31                             | 0.001 | 1.11         | 1.54         | 1.30                                         | 0.002 | 1.10         | 1.53         |
|                |              |       |              |              |                                  |       |              |              |                                              |       |              |              |
|                | % difference | P     | Lower 95% CI | Upper 95% CI | % difference                     | P     | Lower 95% CI | Upper 95% CI | % difference                                 | P     | Lower 95% CI | Upper 95% CI |
| 2005           | -0.31        | 0.722 | -2.02        | 1.40         | -0.75                            | 0.367 | -2.12        | 1.32         | -0.71                                        | 0.391 | -2.34        | 0.92         |
| 2006           | 0.56         | 0.465 | -0.95        | 2.08         | 0.49                             | 0.511 | -0.97        | 2.09         | 0.50                                         | 0.506 | -0.96        | 1.95         |
| 2008           | 0.00         | -     | -            | -            | 0.00                             | -     | -            | -            | 0.00                                         | -     | -            | -            |
| 2009           | 5.07         | 0.000 | 2.60         | 7.55         | 4.54                             | 0     | 2.67         | 7.65         | 4.52                                         | 0.000 | 2.21         | 6.83         |
| 2010           | 3.04         | 0.001 | 1.17         | 4.91         | 2.86                             | 0.002 | 1.32         | 5.13         | 2.79                                         | 0.002 | 1.01         | 4.56         |
|                |              |       |              |              |                                  |       |              |              |                                              |       |              |              |
| <b>Females</b> |              |       |              |              |                                  |       |              |              |                                              |       |              |              |
|                | OR           | P     | Lower 95% CI | Upper 95% CI | OR                               | P     | Lower 95% CI | Upper 95% CI | OR                                           | P     | Lower 95% CI | Upper 95% CI |

1  
2  
3  
4  
5  
6  
7  
8  
9  
10  
11  
12  
13  
14  
15  
16  
17  
18  
19  
20  
21  
22  
23  
24  
25  
26  
27  
28  
29  
30  
31  
32  
33  
34  
35  
36  
37  
38  
39  
40  
41  
42  
43  
44  
45  
46  
47  
48  
49

|             |                     |          |                     |                     |                     |          |                     |                     |                     |          |                     |                     |
|-------------|---------------------|----------|---------------------|---------------------|---------------------|----------|---------------------|---------------------|---------------------|----------|---------------------|---------------------|
| <b>2005</b> | 1.01                | 0.917    | 0.88                | 1.15                | 1.00                | 0.958    | 0.88                | 1.15                | 1.00                | 0.956    | 0.88                | 1.15                |
| <b>2006</b> | 0.96                | 0.467    | 0.86                | 1.07                | 0.95                | 0.342    | 0.85                | 1.06                | 0.95                | 0.344    | 0.85                | 1.06                |
| <b>2008</b> | 1.00                | -        | -                   | -                   | 1.00                | -        | -                   | -                   | 1.00                | -        | -                   | -                   |
| <b>2009</b> | 1.04                | 0.641    | 0.88                | 1.23                | 1.06                | 0.522    | 0.90                | 1.24                | 1.06                | 0.523    | 0.90                | 1.24                |
| <b>2010</b> | 1.06                | 0.369    | 0.93                | 1.22                | 1.05                | 0.493    | 0.91                | 1.20                | 1.05                | 0.482    | 0.92                | 1.20                |
|             |                     |          |                     |                     |                     |          |                     |                     |                     |          |                     |                     |
|             | <b>% difference</b> | <b>P</b> | <b>Lower 95% CI</b> | <b>Upper 95% CI</b> | <b>% difference</b> | <b>P</b> | <b>Lower 95% CI</b> | <b>Upper 95% CI</b> | <b>% difference</b> | <b>P</b> | <b>Lower 95% CI</b> | <b>Upper 95% CI</b> |
| <b>2005</b> | 0.09                | 0.918    | -1.69               | 1.88                | 0.05                | 0.959    | -1.70               | 1.79                | 0.05                | 0.956    | -1.69               | 1.79                |
| <b>2006</b> | -0.55               | 0.467    | -2.04               | 0.94                | -0.70               | 0.341    | -2.13               | 0.74                | -0.69               | 0.344    | -2.13               | 0.74                |
| <b>2008</b> | 0.00                | -        | -                   | -                   | 0.00                | -        | -                   | -                   | 0.00                | -        | -                   | -                   |
| <b>2009</b> | 0.53                | 0.643    | -1.70               | 2.76                | 0.70                | 0.526    | -1.48               | 2.89                | 0.70                | 0.527    | -1.48               | 2.88                |
| <b>2010</b> | 0.84                | 0.372    | -1.01               | 2.70                | 0.63                | 0.495    | -1.18               | 2.43                | 0.64                | 0.485    | -1.16               | 2.44                |

\* Reference group is 2008. Selected years around the current recession shown but analyses for all years available in the on-line appendix.  
 CI = Confidence Interval  
 OR = Odds Ratio  
 P = P value

View Only

Table 3: Odds ratio and % difference for GHQ caseness by year for women

| Year | Model 1 (age adjusted) |       |                       | Model 2 (adjusted for age, education level and employment status) |       |                       |
|------|------------------------|-------|-----------------------|-------------------------------------------------------------------|-------|-----------------------|
|      | OR (95% CI)*           | P     | % difference (95% CI) | OR (95% CI)*                                                      | P     | % difference (95% CI) |
| 1991 | 1.75 (1.40 to 2.20)    | 0.000 | 7.34 (4.40 to 10.27)  | 1.81 (1.39 to 2.36)                                               | 0.000 | 7.53 (4.30 to 10.75)  |
| 1992 | 1.46 (1.16 to 1.84)    | 0.001 | 5.31 (2.14 to 8.48)   | 1.59 (1.25 to 2.02)                                               | 0.000 | 6.32 (3.10 to 9.54)   |
| 1993 | 1.43 (1.29 to 1.57)    | 0.000 | 4.87 (3.52 to 6.22)   | 1.55 (1.39 to 1.73)                                               | 0.000 | 5.83 (4.37 to 7.30)   |
| 1994 | 1.61 (1.45 to 1.78)    | 0.000 | 6.32 (4.98 to 7.66)   | 1.77 (1.58 to 1.99)                                               | 0.000 | 7.33 (5.90 to 8.76)   |
| 1997 | 1.59 (1.38 to 1.84)    | 0.000 | 6.17 (4.27 to 8.06)   | 1.68 (1.43 to 1.96)                                               | 0.000 | 6.55 (4.62 to 8.49)   |
| 1998 | 1.47 (1.31 to 1.64)    | 0.000 | 4.98 (3.56 to 6.39)   | 1.58 (1.39 to 1.79)                                               | 0.000 | 5.64 (4.15 to 7.13)   |
| 1999 | 1.29 (1.11 to 1.50)    | 0.001 | 3.59 (1.50 to 5.67)   | 1.40 (1.19 to 1.65)                                               | 0.000 | 4.44 (2.30 to 6.59)   |
| 2000 | 1.47 (1.24 to 1.73)    | 0.000 | 4.63 (2.66 to 6.61)   | 1.61 (1.33 to 1.94)                                               | 0.000 | 5.22 (3.19 to 7.26)   |
| 2001 | 1.44 (1.28 to 1.62)    | 0.000 | 4.19 (2.85 to 5.53)   | 1.55 (1.37 to 1.77)                                               | 0.000 | 4.75 (3.38 to 6.13)   |
| 2002 | 1.41 (1.21 to 1.64)    | 0.000 | 4.73 (2.71 to 6.76)   | 1.51 (1.27 to 1.78)                                               | 0.000 | 5.32 (3.19 to 7.45)   |
| 2003 | 1.29 (1.14 to 1.45)    | 0.000 | 2.91 (1.52 to 4.29)   | 1.38 (1.20 to 1.58)                                               | 0.000 | 3.44 (1.99 to 4.88)   |
| 2004 | 1.35 (1.11 to 1.63)    | 0.002 | 3.37 (1.25 to 5.49)   | 1.40 (1.14 to 1.71)                                               | 0.001 | 3.51 (1.38 to 5.65)   |
| 2005 | 1.52 (1.29 to 1.80)    | 0.000 | 4.85 (2.97 to 6.72)   | 1.68 (1.40 to 2.03)                                               | 0.000 | 5.46 (3.57 to 7.35)   |
| 2006 | 1.33 (1.18 to 1.49)    | 0.000 | 3.29 (1.92 to 4.67)   | 1.40 (1.22 to 1.60)                                               | 0.000 | 3.57 (2.18 to 4.96)   |
| 2008 | 1.46 (1.29 to 1.65)    | 0.000 | 4.41 (3.03 to 5.79)   | 1.54 (1.34 to 1.76)                                               | 0.000 | 4.52 (3.11 to 5.94)   |
| 2009 | 0.99 (0.79 to 1.24)    | 0.927 | -0.15 (-3.26 to 2.97) | 1.09 (0.86 to 1.39)                                               | 0.465 | 1.13 (-1.89 to 4.15)  |
| 2010 | 1.19 (1.01 to 1.39)    | 0.036 | 2.24 (0.16 to 4.32)   | 1.24 (1.04 to 1.48)                                               | 0.016 | 2.63 (0.52 to 4.75)   |

\* Reference group is men  
 CI = Confidence Interval  
 OR = Odds Ratio  
 P = P value

1  
2  
3  
4  
5  
6  
7  
8  
9  
10  
11  
12  
13  
14  
15  
16  
17  
18  
19  
20  
21  
22  
23  
24  
25  
26  
27  
28  
29  
30  
31  
32  
33  
34  
35  
36  
37  
38  
39  
40  
41  
42  
43  
44  
45  
46  
47  
48  
49  
50  
51  
52  
53  
54  
55  
56  
57  
58  
59  
60

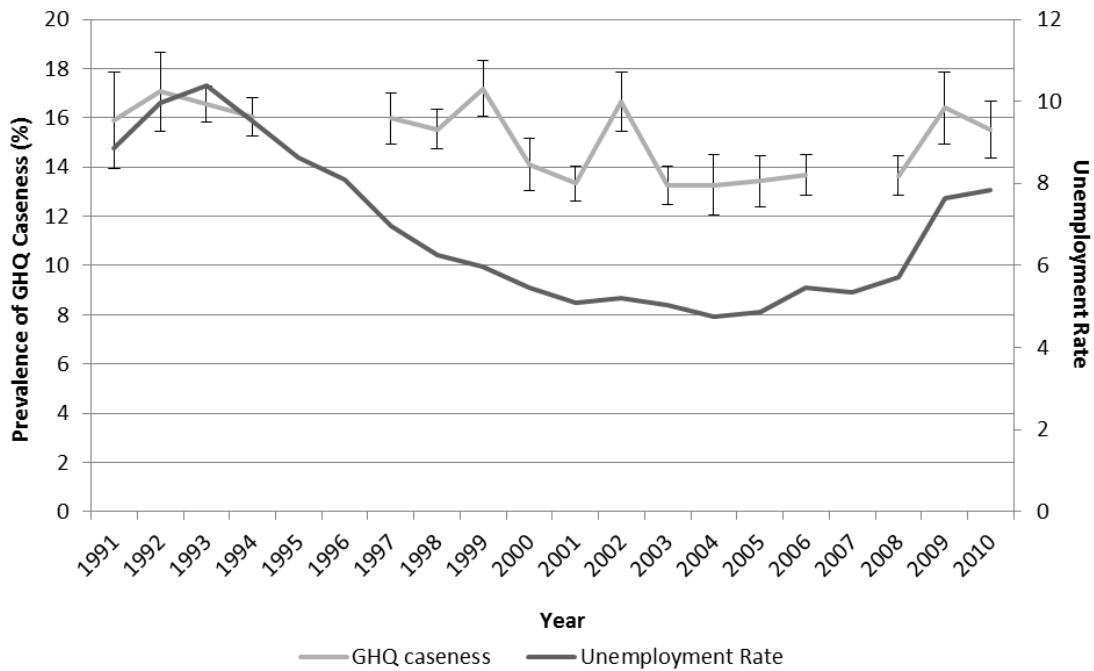

Figure 1: Overall prevalence of GHQ caseness and unemployment rate 1991 to 2010

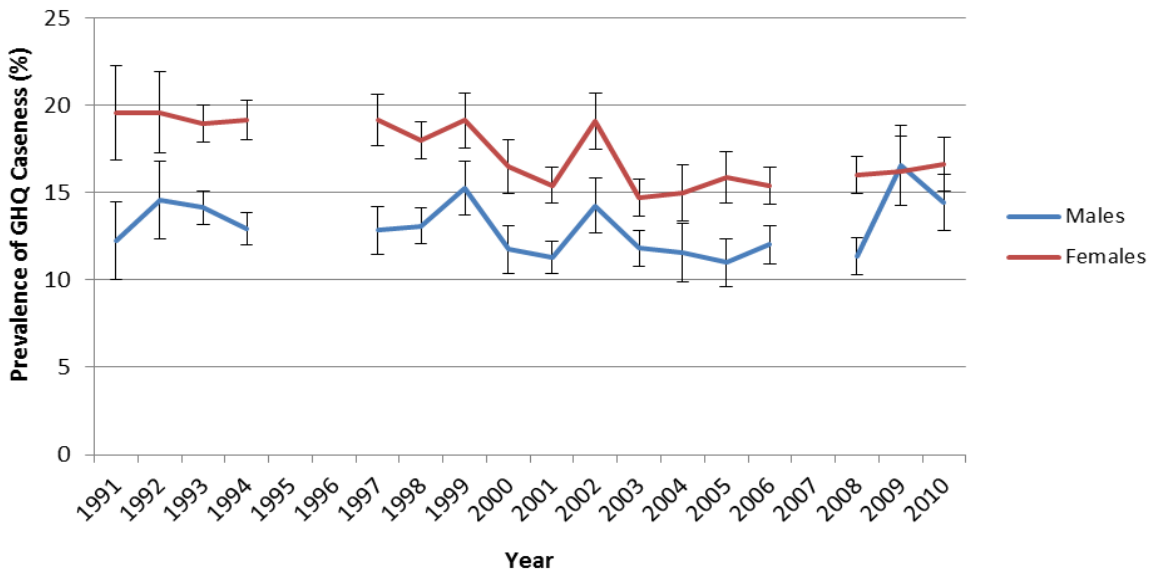

Figure 2: Prevalence of GHQ caseness by gender 1991 to 2010

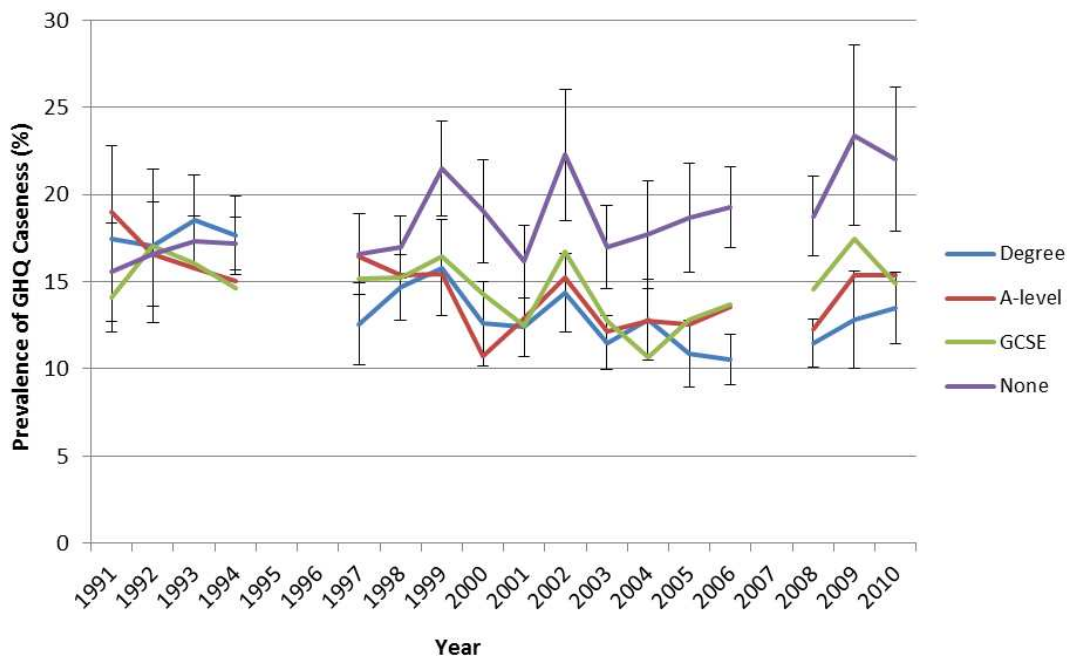

Figure 3: Prevalence of GHQ caseness by highest education level 1991 to 2010

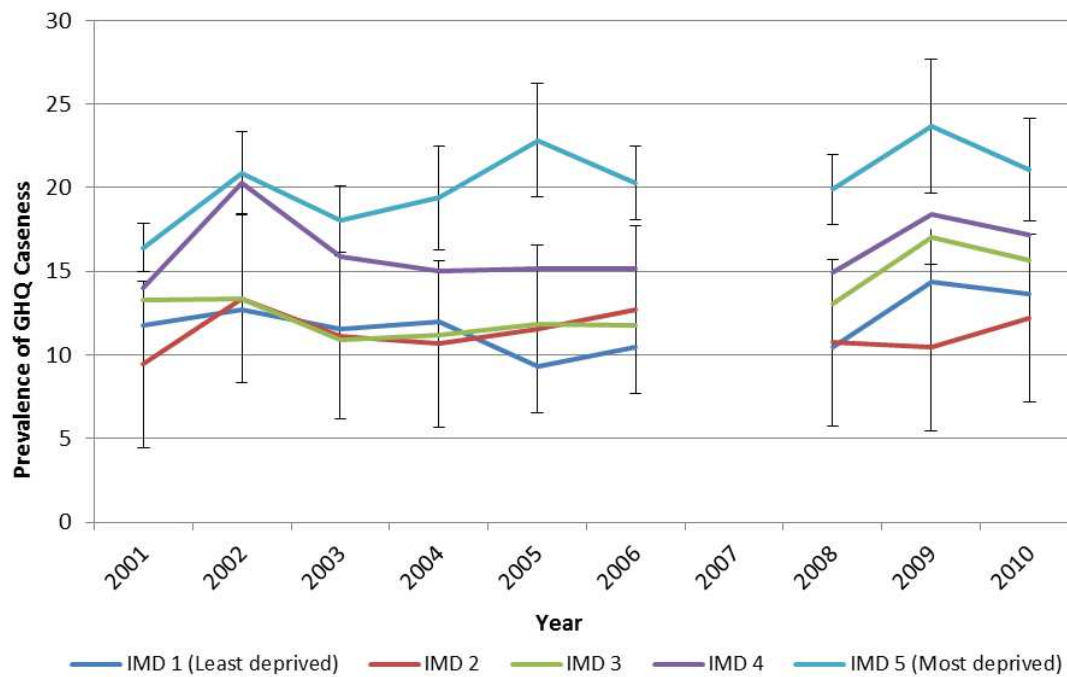

Figure 4: Prevalence of GHQ caseness by area-level deprivation (index for multiple deprivation, IMD) 2001 to 2010

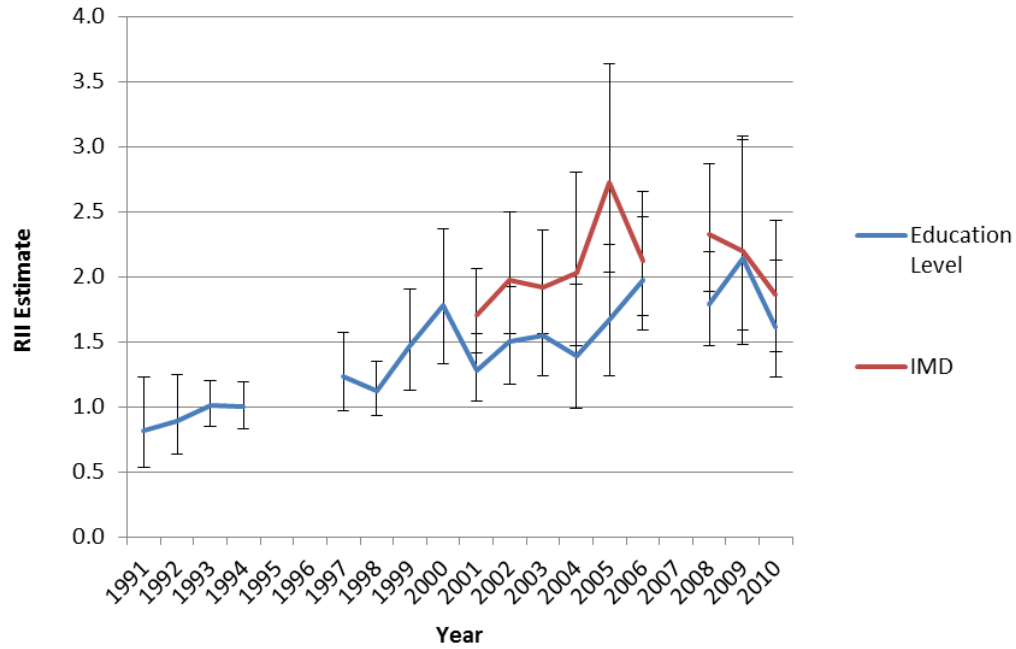

Figure 5: Relative Index of Inequality (RII) for GHQ Caseness as assessed education level and area-level deprivation (index for multiple deprivation, IMD) 1991 to 2010

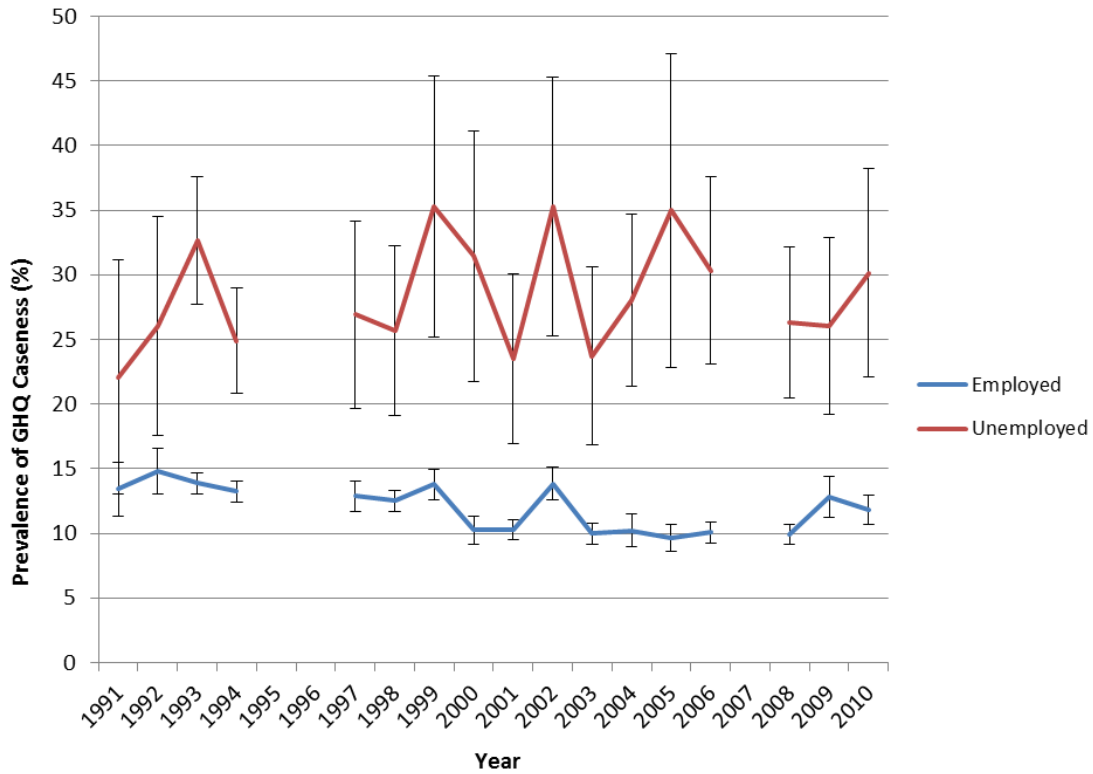

Figure 6: GHQ caseness by employment status 1991 to 2010

## References

1. CSDH. Closing the gap in a generation: Health equity through action on the social determinants of health. Final report of the Commission on Social Determinants of Health. Geneva: World Health Organization, 2008.
2. BBC News. Q&A: Lehman Brothers bank collapse 2008.
3. Stuckler D, Basu S, McKee M, Suhrcke M. Responding to the economic crisis: a primer for public health professionals. *Journal of Public Health* 2010;32(3):298-306.
4. Stuckler D, Basu S, Suhrcke M, McKee M. The health implications of financial crisis: A review of the evidence. *Ulster Med J* 2009;78(3):142-45.
5. Carrera S, Beaumont J. Income and wealth - Social Trends 41. In: Beaumont J, editor. London: Office for National Statistics, 2011.
6. Office for National Statistics. GDP and the Labour Market, 2012 Q1 - May GDP update. London, 2012.
7. Bambra C. *Work, Worklessness and the Political Economy of Health*. Oxford: Oxford University Press, 2011.
8. Bambra C, Pope D, Swami V, Stanistreet D, Roskam A, Kunst A, et al. Gender, health inequalities and welfare state regimes: a cross-national study of thirteen European countries. *J Epidemiol Community Health* 2009;63(1):jech-070292.
9. Roelfs DJ, Shor E, Davidson KW, Schwartz JE. Losing life and livelihood: A systematic review and meta-analysis of unemployment and all-cause mortality. *Social Science & Medicine* 2011;72(6):840-54.
10. Bezruchka S. The effect of economic recession on population health. *Canadian Medical Association Journal* 2009;181(5):281-85.
11. Bambra C. Yesterday once more? Unemployment and health in the 21st century. *Journal of Epidemiology and Community Health* 2010;64(3):213-15.
12. Minton JW, Pickett KE, Dorling D. Health, employment, and economic change, 1973-2009: repeated cross sectional study. *BMJ* 2012;344.
13. Office for National Statistics. Impact of the recession on the labour market. London, 2009.
14. Mindell J, Biddulph JP, Hirani V, Stamatakis E, Craig R, Nunn S, et al. Cohort Profile: The Health Survey for England. *International Journal of Epidemiology* 2012.
15. Aresu M, Boodhna G, Bryson A, Bridges S, Chaudhury M, Craig R, et al. Health Survey for England 2010. Volume 2: Methods and Documentation. In: Craig R, Mindell J, editors. London: National Centre for Social Research, 2011.
16. Bennett N, Dodd T, Flatley J, editors. *A survey carried out by the Social Survey Division of OPCS on behalf of the Department of Health*. London: HMSO, 1995. London, 1995.
17. Spence A. Labour Market - Social Trends 41. In: Beaumont J, editor. London: Office for National Statistics, 2011.
18. Office for National Statistics. Regional labour market statistics, January 2012. London, 2012.
19. Goldberg DP, Gater R, Sartorius N, Ustun TB, Piccinelli M, Gureje O, et al. The validity of two versions of the GHQ in the WHO study of mental illness in general health care. *Psychological Medicine* 1997;27(01):191-97.



- 1
  - 2
  - 3
  - 4
  - 5
  - 6
  - 7
  - 8
  - 9
  - 10
  - 11
  - 12
  - 13
  - 14
  - 15
  - 16
  - 17
  - 18
  - 19
  - 20
  - 21
  - 22
  - 23
  - 24
  - 25
  - 26
  - 27
  - 28
  - 29
  - 30
  - 31
  - 32
  - 33
  - 34
  - 35
  - 36
  - 37
  - 38
  - 39
  - 40
  - 41
  - 42
  - 43
  - 44
  - 45
  - 46
  - 47
  - 48
  - 49
  - 50
  - 51
  - 52
  - 53
  - 54
  - 55
  - 56
  - 57
  - 58
  - 59
  - 60
20. Goldberg D, Williams P. *A User's Guide to the General Health Questionnaire*. Windsor: NFER-Nelson, 1988.
21. Mood C. Logistic Regression: Why We Cannot Do What We Think We Can Do, and What We Can Do About It. *European Sociological Review* 2010;26(1):67-82.
22. Stuckler D, Basu S, Suhrcke M, Coutts A, McKee M. The public health effect of economic crises and alternative policy responses in Europe: an empirical analysis. *The Lancet*;374(9686):315-23.
23. Stuckler D, Basu S, Suhrcke M, Coutts A, McKee M. Effects of the 2008 recession on health: a first look at European data. *The Lancet*;378(9786):124-25.
24. Zivin K, Paczkowski M, Galea S. Economic downturns and population mental health: research findings, gaps, challenges and priorities. *Psychological Medicine*;FirstView:1-6.
25. Riva M, Bambra C, Easton S, Curtis S. Hard times or good times? Inequalities in the health effects of economic change. *International Journal of Public Health* 2011;56(1):3-5.
26. Gili M, Roca M, Basu S, McKee M, Stuckler D. The mental health risks of economic crisis in Spain: evidence from primary care centres, 2006 and 2010. *The European Journal of Public Health* 2012.
27. Heimo Viinamäki JH, Osmo Kontula, Leo Niskanen, Kaj Koskela. Mental health at population level during an economic recession in Finland. *Nordic Journal of Psychiatry* 2000;54(3):177-82.
28. Sandra H. Economic stability and health status: Evidence from East Asia before and after the 1990s economic crisis. *Health Policy* 2006;75(3):347-57.
29. Stuckler D, Basu S, McKee M. Budget crises, health, and social welfare programmes. *BMJ* 2010;340.
30. Uutela A. Economic crisis and mental health. *Current Opinion in Psychiatry* 2010;23(2):127-30 10.1097/YCO.0b013e328336657d.
31. Lundin A, Hemmingsson T. Unemployment and suicide. *The Lancet* 2009;374(9686):270-71.
32. Ferrie JE, Shipley MJ, Marmot MG, Stansfeld S, Smith GD. Health effects of anticipation of job change and non-employment: longitudinal data from the Whitehall II study. *BMJ* 1995;311(7015):1264-69.

Web Only Table A: Analysis of Data from 1991-2010 in Men Adjusted for Age, Employment Status and Education

| Model 1: Age                                 |      |       |              |              |              |       |              |              |
|----------------------------------------------|------|-------|--------------|--------------|--------------|-------|--------------|--------------|
| Year                                         | OR   | P     | Lower 95% CI | Upper 95% CI | % difference | P     | Lower 95% CI | Upper 95% CI |
| 1991                                         | 1.09 | 0.484 | 0.86         | 1.36         | 0.85         | 0.492 | -1.57        | 3.27         |
| 1992                                         | 1.30 | 0.013 | 1.06         | 1.59         | 2.91         | 0.018 | 0.50         | 5.31         |
| 1993                                         | 1.28 | 0.000 | 1.13         | 1.46         | 2.76         | 0.000 | 1.35         | 4.17         |
| 1994                                         | 1.15 | 0.040 | 1.01         | 1.31         | 1.49         | 0.038 | 0.08         | 2.89         |
| 1997                                         | 1.15 | 0.091 | 0.98         | 1.34         | 1.46         | 0.094 | -0.25        | 3.17         |
| 1998                                         | 1.17 | 0.029 | 1.02         | 1.34         | 1.65         | 0.028 | 0.17         | 3.13         |
| 1999                                         | 1.40 | 0.000 | 1.20         | 1.64         | 3.89         | 0.000 | 2.03         | 5.75         |
| 2000                                         | 1.04 | 0.624 | 0.88         | 1.23         | 0.43         | 0.625 | -1.31        | 2.17         |
| 2001                                         | 0.98 | 0.825 | 0.86         | 1.13         | -0.16        | 0.825 | -1.55        | 1.24         |
| 2002                                         | 1.29 | 0.003 | 1.09         | 1.52         | 2.79         | 0.004 | 0.91         | 4.68         |
| 2003                                         | 1.05 | 0.534 | 0.91         | 1.21         | 0.47         | 0.534 | -1.00        | 1.94         |
| 2004                                         | 1.00 | 0.963 | 0.83         | 1.22         | 0.05         | 0.963 | -1.88        | 1.97         |
| 2005                                         | 0.97 | 0.723 | 0.82         | 1.15         | -0.31        | 0.722 | -2.02        | 1.40         |
| 2006                                         | 1.06 | 0.465 | 0.91         | 1.22         | 0.56         | 0.465 | -0.95        | 2.08         |
| 2008                                         | 1.00 | -     | -            | -            | 0.00         | -     | -            | -            |
| 2009                                         | 1.53 | 0.000 | 1.26         | 1.86         | 5.07         | 0.000 | 2.60         | 7.55         |
| 2010                                         | 1.31 | 0.001 | 1.12         | 1.54         | 3.04         | 0.001 | 1.17         | 4.91         |
| Model 2: Age + Employment Status             |      |       |              |              |              |       |              |              |
| Year                                         | OR   | P     | Lower 95% CI | Upper 95% CI | % difference | P     | Lower 95% CI | Upper 95% CI |
| 1991                                         | 1.03 | 0.793 | 0.81         | 1.32         | 0.32         | 0.795 | -2.12        | 2.77         |
| 1992                                         | 1.19 | 0.108 | 0.96         | 1.48         | 1.83         | 0.119 | -0.47        | 4.14         |
| 1993                                         | 1.22 | 0.005 | 1.06         | 1.40         | 2.06         | 0.004 | 0.66         | 3.46         |
| 1994                                         | 1.07 | 0.308 | 0.94         | 1.23         | 0.72         | 0.306 | -0.66        | 2.09         |
| 1997                                         | 1.06 | 0.453 | 0.90         | 1.25         | 0.62         | 0.455 | -1.01        | 2.26         |
| 1998                                         | 1.12 | 0.128 | 0.97         | 1.29         | 1.12         | 0.127 | -0.32        | 2.55         |
| 1999                                         | 1.32 | 0.001 | 1.12         | 1.55         | 2.97         | 0.001 | 1.19         | 4.75         |
| 2000                                         | 0.95 | 0.549 | 0.80         | 1.13         | -0.50        | 0.547 | -2.13        | 1.13         |
| 2001                                         | 0.93 | 0.303 | 0.81         | 1.07         | -0.71        | 0.305 | -2.05        | 0.64         |
| 2002                                         | 1.26 | 0.007 | 1.06         | 1.50         | 2.46         | 0.009 | 0.62         | 4.30         |
| 2003                                         | 1.01 | 0.926 | 0.87         | 1.17         | 0.07         | 0.926 | -1.36        | 1.50         |
| 2004                                         | 0.99 | 0.959 | 0.82         | 1.20         | -0.05        | 0.959 | -1.90        | 1.80         |
| 2005                                         | 0.92 | 0.370 | 0.78         | 1.10         | -0.75        | 0.367 | -2.39        | 0.88         |
| 2006                                         | 1.05 | 0.511 | 0.91         | 1.22         | 0.49         | 0.511 | -0.98        | 1.96         |
| 2008                                         | 1.00 | -     | -            | -            | 0.00         | -     | 0.00         | 0.00         |
| 2009                                         | 1.50 | 0.000 | 1.24         | 1.82         | 4.54         | 0.000 | 2.23         | 6.86         |
| 2010                                         | 1.31 | 0.001 | 1.11         | 1.54         | 2.86         | 0.002 | 1.07         | 4.65         |
| Model 3: Age + Employment Status + Education |      |       |              |              |              |       |              |              |
| Year                                         | OR   | P     | Lower 95% CI | Upper 95% CI | % difference | P     | Lower 95% CI | Upper 95% CI |
| 1991                                         | 1.07 | 0.612 | 0.83         | 1.36         | 0.63         | 0.617 | -1.84        | 3.10         |
| 1992                                         | 1.22 | 0.069 | 0.98         | 1.51         | 2.07         | 0.079 | -0.24        | 4.37         |
| 1993                                         | 1.25 | 0.002 | 1.09         | 1.43         | 2.29         | 0.001 | 0.88         | 3.70         |
| 1994                                         | 1.10 | 0.184 | 0.96         | 1.26         | 0.94         | 0.182 | -0.44        | 2.32         |
| 1997                                         | 1.08 | 0.363 | 0.92         | 1.27         | 0.75         | 0.366 | -0.88        | 2.39         |
| 1998                                         | 1.13 | 0.086 | 0.98         | 1.31         | 1.26         | 0.085 | -0.17        | 2.69         |
| 1999                                         | 1.34 | 0.001 | 1.13         | 1.57         | 3.09         | 0.001 | 1.31         | 4.86         |
| 2000                                         | 0.96 | 0.607 | 0.81         | 1.13         | -0.43        | 0.606 | -2.05        | 1.20         |
| 2001                                         | 0.93 | 0.347 | 0.81         | 1.08         | -0.64        | 0.349 | -1.98        | 0.70         |
| 2002                                         | 1.27 | 0.007 | 1.07         | 1.50         | 2.48         | 0.008 | 0.64         | 4.31         |
| 2003                                         | 1.01 | 0.847 | 0.88         | 1.17         | 0.14         | 0.846 | -1.28        | 1.57         |
| 2004                                         | 1.00 | 0.989 | 0.83         | 1.21         | 0.01         | 0.989 | -1.83        | 1.86         |
| 2005                                         | 0.93 | 0.394 | 0.78         | 1.10         | -0.71        | 0.391 | -2.34        | 0.92         |

|      |      |       |      |      |      |       |       |      |
|------|------|-------|------|------|------|-------|-------|------|
| 2006 | 1.05 | 0.506 | 0.91 | 1.22 | 0.50 | 0.506 | -0.96 | 1.95 |
| 2008 | 1.00 | -     | -    | -    | 0.00 | -     | -     | -    |
| 2009 | 1.50 | 0.000 | 1.24 | 1.82 | 4.52 | 0.000 | 2.21  | 6.83 |
| 2010 | 1.30 | 0.002 | 1.10 | 1.53 | 2.79 | 0.002 | 1.01  | 4.56 |

\* Reference group is 2008

CI = Confidence Interval

OR = Odds Ratio

P = P value

Web Only Table B: Analysis of Data from 1991-2010 in Women Adjusted for Age, Employment Status and Education

| Model 1: Age                                 |      |       |              |              |              |       |              |              |
|----------------------------------------------|------|-------|--------------|--------------|--------------|-------|--------------|--------------|
| Year                                         | OR   | P     | Lower 95% CI | Upper 95% CI | % difference | P     | Lower 95% CI | Upper 95% CI |
| 1991                                         | 1.30 | 0.006 | 1.08         | 1.56         | 3.76         | 0.009 | 0.93         | 6.59         |
| 1992                                         | 1.30 | 0.001 | 1.11         | 1.53         | 3.80         | 0.002 | 1.35         | 6.26         |
| 1993                                         | 1.25 | 0.000 | 1.12         | 1.39         | 3.19         | 0.000 | 1.69         | 4.68         |
| 1994                                         | 1.26 | 0.000 | 1.14         | 1.40         | 3.36         | 0.000 | 1.84         | 4.88         |
| 1997                                         | 1.25 | 0.000 | 1.10         | 1.41         | 3.17         | 0.001 | 1.39         | 4.96         |
| 1998                                         | 1.17 | 0.005 | 1.05         | 1.30         | 2.17         | 0.005 | 0.67         | 3.67         |
| 1999                                         | 1.24 | 0.001 | 1.09         | 1.41         | 3.09         | 0.001 | 1.24         | 4.94         |
| 2000                                         | 1.05 | 0.521 | 0.91         | 1.20         | 0.60         | 0.523 | -1.24        | 2.45         |
| 2001                                         | 0.97 | 0.642 | 0.87         | 1.09         | -0.35        | 0.642 | -1.82        | 1.12         |
| 2002                                         | 1.24 | 0.001 | 1.09         | 1.41         | 3.10         | 0.001 | 1.22         | 4.98         |
| 2003                                         | 0.92 | 0.171 | 0.82         | 1.04         | -1.04        | 0.170 | -2.53        | 0.45         |
| 2004                                         | 0.93 | 0.313 | 0.80         | 1.08         | -1.00        | 0.308 | -2.91        | 0.92         |
| 2005                                         | 1.01 | 0.917 | 0.88         | 1.15         | 0.09         | 0.918 | -1.69        | 1.88         |
| 2006                                         | 0.96 | 0.467 | 0.86         | 1.07         | -0.55        | 0.467 | -2.04        | 0.94         |
| 2008                                         | 1.00 | -     | -            | -            | 0.00         | -     | -            | -            |
| 2009                                         | 1.04 | 0.641 | 0.88         | 1.23         | 0.53         | 0.643 | -1.70        | 2.76         |
| 2010                                         | 1.06 | 0.369 | 0.93         | 1.22         | 0.84         | 0.372 | -1.01        | 2.70         |
| Model 2: Age + Employment Status             |      |       |              |              |              |       |              |              |
| Year                                         | OR   | P     | Lower 95% CI | Upper 95% CI | % difference | P     | Lower 95% CI | Upper 95% CI |
| 1991                                         | 1.29 | 0.007 | 1.07         | 1.55         | 3.57         | 0.010 | 0.86         | 6.28         |
| 1992                                         | 1.31 | 0.002 | 1.11         | 1.55         | 3.77         | 0.003 | 1.29         | 6.25         |
| 1993                                         | 1.24 | 0.000 | 1.11         | 1.38         | 2.95         | 0.000 | 1.49         | 4.42         |
| 1994                                         | 1.26 | 0.000 | 1.13         | 1.41         | 3.25         | 0.000 | 1.76         | 4.73         |
| 1997                                         | 1.20 | 0.003 | 1.06         | 1.36         | 2.54         | 0.004 | 0.81         | 4.27         |
| 1998                                         | 1.15 | 0.014 | 1.03         | 1.28         | 1.83         | 0.013 | 0.38         | 3.29         |
| 1999                                         | 1.21 | 0.003 | 1.07         | 1.38         | 2.63         | 0.004 | 0.85         | 4.41         |
| 2000                                         | 1.02 | 0.766 | 0.89         | 1.17         | 0.27         | 0.766 | -1.49        | 2.02         |
| 2001                                         | 0.94 | 0.308 | 0.84         | 1.06         | -0.74        | 0.308 | -2.17        | 0.69         |
| 2002                                         | 1.22 | 0.002 | 1.07         | 1.39         | 2.73         | 0.003 | 0.93         | 4.52         |
| 2003                                         | 0.92 | 0.170 | 0.82         | 1.04         | -1.02        | 0.170 | -2.47        | 0.44         |
| 2004                                         | 0.92 | 0.261 | 0.79         | 1.07         | -1.09        | 0.254 | -2.97        | 0.79         |
| 2005                                         | 1.00 | 0.958 | 0.88         | 1.15         | 0.05         | 0.959 | -1.70        | 1.79         |
| 2006                                         | 0.95 | 0.342 | 0.85         | 1.06         | -0.70        | 0.341 | -2.13        | 0.74         |
| 2008                                         | 1.00 | -     | -            | -            | 0.00         | -     | -            | -            |
| 2009                                         | 1.06 | 0.522 | 0.90         | 1.24         | 0.70         | 0.526 | -1.48        | 2.89         |
| 2010                                         | 1.05 | 0.493 | 0.91         | 1.20         | 0.63         | 0.495 | -1.18        | 2.43         |
| Model 3: Age + Employment Status + Education |      |       |              |              |              |       |              |              |
| Year                                         | OR   | P     | Lower 95% CI | Upper 95% CI | % difference | P     | Lower 95% CI | Upper 95% CI |

1  
2  
3  
4  
5  
6  
7  
8  
9  
10  
11  
12  
13  
14  
15  
16  
17  
18  
19  
20  
21  
22  
23  
24  
25  
26  
27  
28  
29  
30  
31  
32  
33  
34  
35  
36  
37  
38  
39  
40  
41  
42  
43  
44  
45  
46  
47  
48  
49  
50  
51  
52  
53  
54  
55  
56  
57  
58  
59  
60

|             |      |       |      |      |       |       |       |      |
|-------------|------|-------|------|------|-------|-------|-------|------|
| <b>1991</b> | 1.29 | 0.007 | 1.07 | 1.55 | 3.56  | 0.011 | 0.83  | 6.28 |
| <b>1992</b> | 1.31 | 0.002 | 1.11 | 1.55 | 3.79  | 0.003 | 1.31  | 6.26 |
| <b>1993</b> | 1.24 | 0.000 | 1.11 | 1.38 | 2.96  | 0.000 | 1.48  | 4.44 |
| <b>1994</b> | 1.26 | 0.000 | 1.14 | 1.41 | 3.26  | 0.000 | 1.77  | 4.76 |
| <b>1997</b> | 1.20 | 0.004 | 1.06 | 1.36 | 2.54  | 0.004 | 0.81  | 4.27 |
| <b>1998</b> | 1.15 | 0.013 | 1.03 | 1.28 | 1.85  | 0.013 | 0.39  | 3.30 |
| <b>1999</b> | 1.21 | 0.003 | 1.07 | 1.38 | 2.64  | 0.004 | 0.85  | 4.42 |
| <b>2000</b> | 1.02 | 0.752 | 0.89 | 1.17 | 0.28  | 0.753 | -1.47 | 2.04 |
| <b>2001</b> | 0.94 | 0.319 | 0.84 | 1.06 | -0.72 | 0.319 | -2.15 | 0.70 |
| <b>2002</b> | 1.22 | 0.002 | 1.07 | 1.39 | 2.75  | 0.003 | 0.96  | 4.55 |
| <b>2003</b> | 0.92 | 0.179 | 0.82 | 1.04 | -1.00 | 0.178 | -2.45 | 0.46 |
| <b>2004</b> | 0.92 | 0.263 | 0.79 | 1.07 | -1.09 | 0.257 | -2.97 | 0.79 |
| <b>2005</b> | 1.00 | 0.956 | 0.88 | 1.15 | 0.05  | 0.956 | -1.69 | 1.79 |
| <b>2006</b> | 0.95 | 0.344 | 0.85 | 1.06 | -0.69 | 0.344 | -2.13 | 0.74 |
| <b>2008</b> | 1.00 | -     | -    | -    | 0.00  | -     | -     | -    |
| <b>2009</b> | 1.06 | 0.523 | 0.90 | 1.24 | 0.70  | 0.527 | -1.48 | 2.88 |
| <b>2010</b> | 1.05 | 0.482 | 0.92 | 1.20 | 0.64  | 0.485 | -1.16 | 2.44 |

\* Reference group is 2008  
 CI = Confidence Interval  
 OR = Odds Ratio  
 P = P value

peer review only

1  
2  
3  
4  
5  
6  
7  
8  
9  
10  
11  
12  
13  
14  
15  
16  
17  
18  
19  
20  
21  
22  
23  
24  
25  
26  
27  
28  
29  
30  
31  
32  
33  
34  
35  
36  
37  
38  
39  
40  
41  
42  
43  
44  
45  
46  
47

Web Table C: Analysis of Data from 2000-2010 in Men Adjusted for Age, Employment Status and Income

|      | Age          |       |              |              | Age, Household Income |       |              |              | Age, Employment Status |       |              |              | Age, Employment Status, Income |       |              |              |
|------|--------------|-------|--------------|--------------|-----------------------|-------|--------------|--------------|------------------------|-------|--------------|--------------|--------------------------------|-------|--------------|--------------|
|      | OR           | P     | Lower 95% CI | Upper 95% CI | OR                    | P     | Lower 95% CI | Upper 95% CI | OR                     | P     | Lower 95% CI | Upper 95% CI | OR                             | P     | Lower 95% CI | Upper 95% CI |
| 2000 | 1.07         | 0.461 | 0.90         | 1.27         | 1.15                  | 0.119 | 0.96         | 1.37         | 0.94                   | 0.523 | 0.78         | 1.13         | 0.96                           | 0.689 | 0.80         | 1.16         |
| 2001 | 1.00         | 0.949 | 0.86         | 1.15         | 0.99                  | 0.922 | 0.85         | 1.15         | 0.91                   | 0.239 | 0.78         | 1.06         | 0.91                           | 0.245 | 0.78         | 1.07         |
| 2002 | 1.32         | 0.002 | 1.11         | 1.58         | 1.35                  | 0.001 | 1.13         | 1.62         | 1.28                   | 0.009 | 1.06         | 1.54         | 1.28                           | 0.008 | 1.07         | 1.55         |
| 2003 | 1.04         | 0.656 | 0.89         | 1.21         | 1.04                  | 0.623 | 0.89         | 1.21         | 0.97                   | 0.725 | 0.83         | 1.14         | 0.97                           | 0.748 | 0.83         | 1.14         |
| 2005 | 1.00         | 0.990 | 0.83         | 1.20         | 0.98                  | 0.791 | 0.81         | 1.17         | 0.92                   | 0.419 | 0.76         | 1.12         | 0.92                           | 0.404 | 0.76         | 1.12         |
| 2006 | 1.04         | 0.601 | 0.89         | 1.22         | 1.05                  | 0.568 | 0.89         | 1.23         | 1.03                   | 0.679 | 0.88         | 1.22         | 1.03                           | 0.682 | 0.88         | 1.22         |
| 2008 | 1.00         | -     | -            | -            | 1.00                  | -     | -            | -            | 1.00                   | -     | -            | -            | 1.00                           | -     | -            | -            |
| 2009 | 1.57         | 0.000 | 1.27         | 1.94         | 1.55                  | 0.000 | 1.25         | 1.92         | 1.53                   | 0.000 | 1.23         | 1.90         | 1.53                           | 0.000 | 1.23         | 1.90         |
| 2010 | 1.26         | 0.010 | 1.06         | 1.49         | 1.24                  | 0.015 | 1.04         | 1.48         | 1.25                   | 0.017 | 1.04         | 1.49         | 1.25                           | 0.017 | 1.04         | 1.49         |
|      |              |       |              |              |                       |       |              |              |                        |       |              |              |                                |       |              |              |
|      | % Difference | P     | Lower 95% CI | Upper 95% CI | % Difference          | P     | Lower 95% CI | Upper 95% CI | % Difference           | P     | Lower 95% CI | Upper 95% CI | % Difference                   | P     | Lower 95% CI | Upper 95% CI |
| 2000 | 0.68         | 0.463 | -1.14        | 2.49         | 1.43                  | 0.124 | -0.39        | 3.26         | -0.55                  | 0.521 | -2.23        | 1.13         | -0.35                          | 0.688 | -2.04        | 1.35         |
| 2001 | -0.05        | 0.949 | -1.53        | 1.43         | -0.07                 | 0.922 | -1.52        | 1.37         | -0.85                  | 0.240 | -2.27        | 0.57         | -0.84                          | 0.246 | -2.26        | 0.58         |
| 2002 | 3.12         | 0.002 | 1.12         | 5.13         | 3.27                  | 0.001 | 1.30         | 5.24         | 2.51                   | 0.011 | 0.58         | 4.44         | 2.55                           | 0.010 | 0.62         | 4.48         |
| 2003 | 0.35         | 0.656 | -1.19        | 1.89         | 0.38                  | 0.623 | -1.13        | 1.89         | -0.27                  | 0.725 | -1.75        | 1.22         | -0.24                          | 0.748 | -1.73        | 1.24         |
| 2005 | 0.01         | 0.990 | -1.82        | 1.85         | -0.24                 | 0.791 | -2.00        | 1.52         | -0.72                  | 0.416 | -2.47        | 1.02         | -0.74                          | 0.401 | -2.47        | 0.99         |
| 2006 | 0.43         | 0.601 | -1.18        | 2.03         | 0.46                  | 0.568 | -1.11        | 2.03         | 0.33                   | 0.679 | -1.22        | 1.87         | 0.32                           | 0.682 | -1.22        | 1.86         |
| 2008 | 0.00         | -     | -            | -            | 0.00                  | -     | -            | -            | 0.00                   | -     | -            | -            | 0.00                           | -     | -            | -            |
| 2009 | 5.35         | 0.000 | 2.64         | 8.05         | 4.95                  | 0.000 | 2.33         | 7.58         | 4.58                   | 0.000 | 2.07         | 7.09         | 4.58                           | 0.000 | 2.07         | 7.09         |
| 2010 | 2.48         | 0.012 | 0.54         | 4.42         | 2.29                  | 0.018 | 0.40         | 4.18         | 2.22                   | 0.019 | 0.36         | 4.08         | 2.21                           | 0.020 | 0.35         | 4.06         |

\* Reference group is 2008  
CI = Confidence Interval  
OR = Odds Ratio  
P = P value

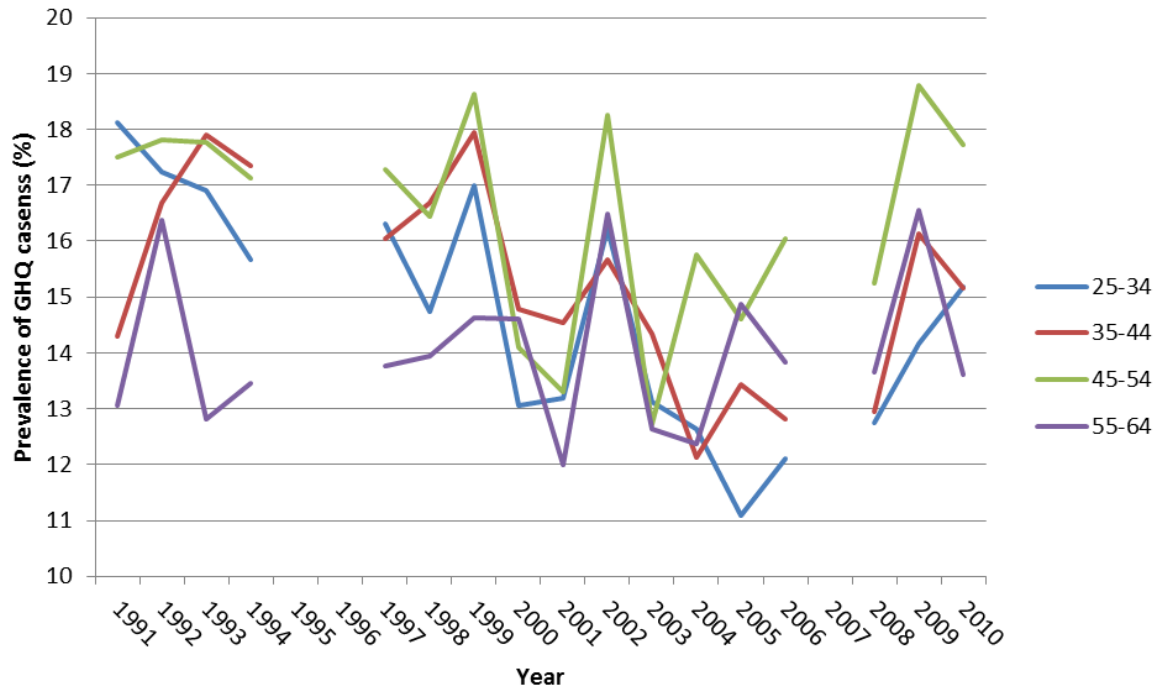

Web figure: Prevalence of GHQ caseness by age group 1991 to 2010

Peer review only

1  
2  
3  
4  
5  
6  
7  
8  
9  
10  
11  
12  
13  
14  
15  
16  
17  
18  
19  
20  
21  
22  
23  
24  
25  
26  
27  
28  
29  
30  
31  
32  
33  
34  
35  
36  
37  
38  
39  
40  
41  
42  
43  
44  
45  
46  
47  
48  
49  
50  
51  
52  
53  
54  
55  
56  
57  
58  
59  
60

STROBE Statement—checklist of items that should be included in reports of observational studies

## The Effects of the Recession on Population Mental Health: A Repeat Cross-Sectional Analysis of the Health Surveys of England

|                              | Item No | Recommendation                                                                                                                                                                                                                                                                                                                                                                                                                                                                                                                                                                                                                                                                                                                                               |
|------------------------------|---------|--------------------------------------------------------------------------------------------------------------------------------------------------------------------------------------------------------------------------------------------------------------------------------------------------------------------------------------------------------------------------------------------------------------------------------------------------------------------------------------------------------------------------------------------------------------------------------------------------------------------------------------------------------------------------------------------------------------------------------------------------------------|
| <b>Title and abstract</b>    | 1       | (a) Indicate the study's design with a commonly used term in the title or the abstract<br><b>Title</b><br>(b) Provide in the abstract an informative and balanced summary of what was done and what was found<br><b>Abstract</b>                                                                                                                                                                                                                                                                                                                                                                                                                                                                                                                             |
| <b>Introduction</b>          |         |                                                                                                                                                                                                                                                                                                                                                                                                                                                                                                                                                                                                                                                                                                                                                              |
| Background/rationale         | 2       | Explain the scientific background and rationale for the investigation being reported<br><b>Introduction, Paragraph 2</b>                                                                                                                                                                                                                                                                                                                                                                                                                                                                                                                                                                                                                                     |
| Objectives                   | 3       | State specific objectives, including any prespecified hypotheses<br><b>Introduction, Paragraph 3</b>                                                                                                                                                                                                                                                                                                                                                                                                                                                                                                                                                                                                                                                         |
| <b>Methods</b>               |         |                                                                                                                                                                                                                                                                                                                                                                                                                                                                                                                                                                                                                                                                                                                                                              |
| Study design                 | 4       | Present key elements of study design early in the paper<br><b>Methods, Paragraph 2</b>                                                                                                                                                                                                                                                                                                                                                                                                                                                                                                                                                                                                                                                                       |
| Setting                      | 5       | Describe the setting, locations, and relevant dates, including periods of recruitment, exposure, follow-up, and data collection<br><b>Methods, Paragraph 1</b>                                                                                                                                                                                                                                                                                                                                                                                                                                                                                                                                                                                               |
| Participants                 | 6       | (a) <i>Cohort study</i> —Give the eligibility criteria, and the sources and methods of selection of participants. Describe methods of follow-up<br><i>Case-control study</i> —Give the eligibility criteria, and the sources and methods of case ascertainment and control selection. Give the rationale for the choice of cases and controls<br><i>Cross-sectional study</i> —Give the eligibility criteria, and the sources and methods of selection of participants<br><b>Methods, Paragraph 3 and cited references therein</b><br>(b) <i>Cohort study</i> —For matched studies, give matching criteria and number of exposed and unexposed<br><i>Case-control study</i> —For matched studies, give matching criteria and the number of controls per case |
| Variables                    | 7       | Clearly define all outcomes, exposures, predictors, potential confounders, and effect modifiers. Give diagnostic criteria, if applicable<br><b>Methods, Paragraphs 3-5</b>                                                                                                                                                                                                                                                                                                                                                                                                                                                                                                                                                                                   |
| Data sources/<br>measurement | 8*      | For each variable of interest, give sources of data and details of methods of assessment (measurement). Describe comparability of assessment methods if there is more than one group<br><b>Methods, Paragraphs 3-5</b>                                                                                                                                                                                                                                                                                                                                                                                                                                                                                                                                       |
| Bias                         | 9       | Describe any efforts to address potential sources of bias<br><b>Methods, Paragraph 4 of Statistical Analysis</b>                                                                                                                                                                                                                                                                                                                                                                                                                                                                                                                                                                                                                                             |
| Study size                   | 10      | Explain how the study size was arrived at<br><b>Existing data analysis. Methods, Paragraph 3 and Table 1.</b>                                                                                                                                                                                                                                                                                                                                                                                                                                                                                                                                                                                                                                                |

|    |                        |                                                                                            |
|----|------------------------|--------------------------------------------------------------------------------------------|
| 1  |                        |                                                                                            |
| 2  | Quantitative variables | 11                                                                                         |
| 3  |                        | Explain how quantitative variables were handled in the analyses. If applicable,            |
| 4  |                        | describe which groupings were chosen and why                                               |
| 5  |                        | <b>Methods, Paragraphs 3-5</b>                                                             |
| 6  | Statistical methods    | 12                                                                                         |
| 7  |                        | (a) Describe all statistical methods, including those used to control for confounding      |
| 8  |                        | <b>Methods, Statistical Analysis section</b>                                               |
| 9  |                        | (b) Describe any methods used to examine subgroups and interactions                        |
| 10 |                        | <b>Methods, Statistical Analysis section</b>                                               |
| 11 |                        | (c) Explain how missing data were addressed                                                |
| 12 |                        | <b>Methods, Paragraph 3 (Population)</b>                                                   |
| 13 |                        | (d) <i>Cohort study</i> —If applicable, explain how loss to follow-up was addressed        |
| 14 |                        | <i>Case-control study</i> —If applicable, explain how matching of cases and controls was   |
| 15 |                        | addressed                                                                                  |
| 16 |                        | <i>Cross-sectional study</i> —If applicable, describe analytical methods taking account of |
| 17 |                        | sampling strategy                                                                          |
| 18 |                        | <b>Methods, Paragraph 4 of Statistical Analysis section</b>                                |
| 19 |                        | (e) Describe any sensitivity analyses                                                      |
| 20 |                        | <b>Methods, Paragraph 3</b>                                                                |
| 21 |                        |                                                                                            |
| 22 |                        |                                                                                            |
| 23 | Continued on next page |                                                                                            |

24  
25  
26  
27  
28  
29  
30  
31  
32  
33  
34  
35  
36  
37  
38  
39  
40  
41  
42  
43  
44  
45  
46  
47  
48  
49  
50  
51  
52  
53  
54  
55  
56  
57  
58  
59  
60



1  
2  
3  
4  
5  
6  
7  
8  
9  
10  
11  
12  
13  
14  
15  
16  
17  
18  
19  
20  
21  
22  
23  
24  
25  
26  
27  
28  
29  
30  
31  
32  
33  
34  
35  
36  
37  
38  
39  
40  
41  
42  
43  
44  
45  
46  
47  
48  
49  
50  
51  
52  
53  
54  
55  
56  
57  
58  
59  
60

| <b>Results</b>           |     |                                                                                                                                                                                                                                                                                                                                                                                                                                                                                                                   |
|--------------------------|-----|-------------------------------------------------------------------------------------------------------------------------------------------------------------------------------------------------------------------------------------------------------------------------------------------------------------------------------------------------------------------------------------------------------------------------------------------------------------------------------------------------------------------|
| Participants             | 13* | (a) Report numbers of individuals at each stage of study—eg numbers potentially eligible, examined for eligibility, confirmed eligible, included in the study, completing follow-up, and analysed<br><b>Table 1 and Methods, Paragraph 3 and cited references</b><br>(b) Give reasons for non-participation at each stage<br><b>Methods, Paragraph 3 and cited references</b><br>(c) Consider use of a flow diagram<br><b>Table 1</b>                                                                             |
| Descriptive data         | 14* | (a) Give characteristics of study participants (eg demographic, clinical, social) and information on exposures and potential confounders<br><b>Table 1</b><br>(b) Indicate number of participants with missing data for each variable of interest<br><b>Methods, Paragraph 3</b><br>(c) <i>Cohort study</i> —Summarise follow-up time (eg, average and total amount)                                                                                                                                              |
| Outcome data             | 15* | <i>Cohort study</i> —Report numbers of outcome events or summary measures over time<br><i>Case-control study</i> —Report numbers in each exposure category, or summary measures of exposure<br><i>Cross-sectional study</i> —Report numbers of outcome events or summary measures<br><b>Table 1 and Figures provided</b>                                                                                                                                                                                          |
| Main results             | 16  | (a) Give unadjusted estimates and, if applicable, confounder-adjusted estimates and their precision (eg, 95% confidence interval). Make clear which confounders were adjusted for and why they were included<br><b>Tables 1-3</b><br>(b) Report category boundaries when continuous variables were categorized<br><b>Methods, Paragraph 5</b><br>(c) If relevant, consider translating estimates of relative risk into absolute risk for a meaningful time period<br><b>Reported in Tables 2-3 and main text.</b> |
| Other analyses           | 17  | Report other analyses done—eg analyses of subgroups and interactions, and sensitivity analyses<br><b>Provided in on-line appendix</b>                                                                                                                                                                                                                                                                                                                                                                             |
| <b>Discussion</b>        |     |                                                                                                                                                                                                                                                                                                                                                                                                                                                                                                                   |
| Key results              | 18  | Summarise key results with reference to study objectives<br><b>Discussion, Paragraph 1</b>                                                                                                                                                                                                                                                                                                                                                                                                                        |
| Limitations              | 19  | Discuss limitations of the study, taking into account sources of potential bias or imprecision. Discuss both direction and magnitude of any potential bias<br><b>Discussion, Paragraph 2</b>                                                                                                                                                                                                                                                                                                                      |
| Interpretation           | 20  | Give a cautious overall interpretation of results considering objectives, limitations, multiplicity of analyses, results from similar studies, and other relevant evidence<br><b>Discussion, Paragraph 3</b>                                                                                                                                                                                                                                                                                                      |
| Generalisability         | 21  | Discuss the generalisability (external validity) of the study results<br><b>Discussion, Paragraph 4</b>                                                                                                                                                                                                                                                                                                                                                                                                           |
| <b>Other information</b> |     |                                                                                                                                                                                                                                                                                                                                                                                                                                                                                                                   |
| Funding                  | 22  | Give the source of funding and the role of the funders for the present study and, if applicable, for the original study on which the present article is based                                                                                                                                                                                                                                                                                                                                                     |

**Funding statement provided**

\*Give information separately for cases and controls in case-control studies and, if applicable, for exposed and unexposed groups in cohort and cross-sectional studies.

**Note:** An Explanation and Elaboration article discusses each checklist item and gives methodological background and published examples of transparent reporting. The STROBE checklist is best used in conjunction with this article (freely available on the Web sites of PLoS Medicine at <http://www.plosmedicine.org/>, Annals of Internal Medicine at <http://www.annals.org/>, and Epidemiology at <http://www.epidem.com/>). Information on the STROBE Initiative is available at [www.strobe-statement.org](http://www.strobe-statement.org).

For peer review only

1  
2  
3  
4  
5  
6  
7  
8  
9  
10  
11  
12  
13  
14  
15  
16  
17  
18  
19  
20  
21  
22  
23  
24  
25  
26  
27  
28  
29  
30  
31  
32  
33  
34  
35  
36  
37  
38  
39  
40  
41  
42  
43  
44  
45  
46  
47  
48  
49  
50  
51  
52  
53  
54  
55  
56  
57  
58  
59  
60**% GHQ caseness by agegroup**

| Year | Mean  | 25-34         |              | Mean  | 35-44         |              |
|------|-------|---------------|--------------|-------|---------------|--------------|
|      |       | Lower 95 % CI | Upper 95% CI |       | Lower 95 % CI | Upper 95% CI |
| 1991 | 18.12 | 14.45         | 21.78        | 14.29 | 11.15         | 17.44        |
| 1992 | 17.23 | 13.91         | 20.54        | 16.68 | 13.78         | 19.57        |
| 1993 | 16.91 | 15.51         | 18.31        | 17.89 | 16.36         | 19.42        |
| 1994 | 15.67 | 14.36         | 16.97        | 17.35 | 15.88         | 18.82        |
| 1995 |       |               |              |       |               |              |
| 1996 |       |               |              |       |               |              |
| 1997 | 16.31 | 14.31         | 18.31        | 16.05 | 14.08         | 18.02        |
| 1998 | 14.74 | 13.36         | 16.11        | 16.69 | 15.24         | 18.14        |
| 1999 | 16.99 | 14.84         | 19.14        | 17.96 | 15.94         | 19.97        |
| 2000 | 13.06 | 11.17         | 14.94        | 14.77 | 12.96         | 16.58        |
| 2001 | 13.20 | 11.84         | 14.56        | 14.54 | 13.22         | 15.86        |
| 2002 | 16.23 | 14.00         | 18.46        | 15.67 | 13.76         | 17.58        |
| 2003 | 13.13 | 11.52         | 14.74        | 14.34 | 12.91         | 15.77        |
| 2004 | 12.64 | 10.37         | 14.90        | 12.13 | 10.11         | 14.15        |
| 2005 | 11.10 | 9.04          | 13.16        | 13.42 | 11.58         | 15.27        |
| 2006 | 12.11 | 10.51         | 13.72        | 12.81 | 11.38         | 14.24        |
| 2007 |       |               |              |       |               |              |
| 2008 | 12.75 | 11.17         | 14.32        | 12.95 | 11.61         | 14.29        |
| 2009 | 14.16 | 11.16         | 17.15        | 16.14 | 13.49         | 18.80        |
| 2010 | 15.19 | 12.86         | 17.51        | 15.17 | 12.98         | 17.35        |

|    | 45-54 |               |              | 55-64 |               |              |
|----|-------|---------------|--------------|-------|---------------|--------------|
|    | Mean  | Lower 95 % CI | Upper 95% CI | Mean  | Lower 95 % CI | Upper 95% CI |
| 1  |       |               |              |       |               |              |
| 2  |       |               |              |       |               |              |
| 3  |       |               |              |       |               |              |
| 4  |       |               |              |       |               |              |
| 5  |       |               |              |       |               |              |
| 6  |       |               |              |       |               |              |
| 7  |       |               |              |       |               |              |
| 8  | 17.51 | 13.74         | 21.28        | 13.05 | 9.58          | 16.53        |
| 9  | 17.81 | 14.37         | 21.25        | 16.38 | 12.96         | 19.79        |
| 10 | 17.77 | 16.30         | 19.23        | 12.82 | 11.29         | 14.36        |
| 11 | 17.13 | 15.49         | 18.78        | 13.45 | 11.88         | 15.02        |
| 12 |       |               |              |       |               |              |
| 13 |       |               |              |       |               |              |
| 14 | 17.28 | 15.22         | 19.33        | 13.77 | 11.65         | 15.90        |
| 15 | 16.44 | 14.95         | 17.93        | 13.94 | 12.27         | 15.60        |
| 16 | 18.63 | 16.26         | 21.00        | 14.62 | 12.39         | 16.85        |
| 17 | 14.10 | 12.11         | 16.08        | 14.60 | 12.25         | 16.96        |
| 18 | 13.29 | 11.91         | 14.67        | 11.99 | 10.41         | 13.56        |
| 19 | 18.25 | 15.78         | 20.72        | 16.48 | 13.90         | 19.05        |
| 20 | 12.73 | 11.28         | 14.19        | 12.64 | 11.09         | 14.19        |
| 21 | 15.76 | 13.29         | 18.23        | 12.36 | 10.13         | 14.60        |
| 22 | 14.61 | 12.51         | 16.70        | 14.88 | 12.73         | 17.02        |
| 23 | 16.05 | 14.39         | 17.71        | 13.83 | 12.24         | 15.42        |
| 24 |       |               |              |       |               |              |
| 25 | 15.25 | 13.72         | 16.78        | 13.66 | 12.14         | 15.18        |
| 26 | 18.78 | 15.85         | 21.70        | 16.55 | 13.58         | 19.53        |
| 27 | 17.73 | 15.59         | 19.88        | 13.61 | 11.47         | 15.75        |
| 28 |       |               |              |       |               |              |
| 29 |       |               |              |       |               |              |
| 30 |       |               |              |       |               |              |
| 31 |       |               |              |       |               |              |
| 32 |       |               |              |       |               |              |
| 33 |       |               |              |       |               |              |
| 34 |       |               |              |       |               |              |
| 35 |       |               |              |       |               |              |
| 36 |       |               |              |       |               |              |
| 37 |       |               |              |       |               |              |
| 38 |       |               |              |       |               |              |
| 39 |       |               |              |       |               |              |
| 40 |       |               |              |       |               |              |
| 41 |       |               |              |       |               |              |
| 42 |       |               |              |       |               |              |
| 43 |       |               |              |       |               |              |
| 44 |       |               |              |       |               |              |
| 45 |       |               |              |       |               |              |
| 46 |       |               |              |       |               |              |
| 47 |       |               |              |       |               |              |
| 48 |       |               |              |       |               |              |
| 49 |       |               |              |       |               |              |
| 50 |       |               |              |       |               |              |
| 51 |       |               |              |       |               |              |
| 52 |       |               |              |       |               |              |
| 53 |       |               |              |       |               |              |
| 54 |       |               |              |       |               |              |
| 55 |       |               |              |       |               |              |
| 56 |       |               |              |       |               |              |
| 57 |       |               |              |       |               |              |
| 58 |       |               |              |       |               |              |
| 59 |       |               |              |       |               |              |
| 60 |       |               |              |       |               |              |

**The Effects of the Recession on Trends in Population Mental Health Before and After the 2008 Recession: A Repeat Cross-Sectional Analysis of the 1991-2010 Health Surveys of England**

Srinivasa Vittal Katikireddi [1]\*  
Clinical Research Fellow  
Tel: +44 141 357 3949  
Fax: +44 141 337 2389  
E-mail: [ykatikireddi@sphsu.mrc.ac.uk](mailto:ykatikireddi@sphsu.mrc.ac.uk)

Claire L Niedzwiedz [2]  
Doctoral Student

Frank Popham [1]  
Senior Investigator Scientist

[1] MRC/CSO Social & Public Health Sciences Unit, 4 Lilybank Health Sciences Unit, Glasgow, G12 8RZ.

\*Corresponding author

[2] Institute of Health and Wellbeing, 1 Lilybank Gardens, University of Glasgow

#### Funding

SVK is funded by the Chief Scientist Office at the Scottish Health Directorate as part of the Evaluating Social Interventions programme at the MRC Social and Public Health Sciences Unit (MC\_US\_A540\_0013). FP is funded by the MRC (5TK10). CLN has received no funding for this study. The funders had no influence over the study design, data collection, analysis, interpretation of data, writing of the paper or decision to submit. The paper does not necessarily represent the views of the funding or employing organisations. SVK had full access to the data and take responsibility for the integrity of the data and the accuracy of analysis.

SVK acts as guarantor for this article.

Data sharing: Additional results are available as a supplemental file from the BMJ website. The Health Surveys for England are available from the UK Data Archive.

Ethical approval: This study is an analysis of previously collected data and therefore ethical approval was not required for this study. Ethical approval for each survey was obtained by the Health Survey for England team.

Word count (of main manuscript): 2,77531

#### Competing Interest Statement

All authors have completed the Unified Competing Interest form at [www.icmje.org/coi\\_disclosure.pdf](http://www.icmje.org/coi_disclosure.pdf) (available on request from the corresponding author) and declare that they have no conflicts of interest.

### Copyright Statement

The Corresponding Author has the right to grant on behalf of all authors and does grant on behalf of all authors, a [worldwide licence](#) to the Publishers and its licensees in perpetuity, in all forms, formats and media (whether known now or created in the future), to i) publish, reproduce, distribute, display and store the Contribution, ii) translate the Contribution into other languages, create adaptations, reprints, include within collections and create summaries, extracts and/or, abstracts of the Contribution, iii) create any other derivative work(s) based on the Contribution, iv) to exploit all subsidiary rights in the Contribution, v) the inclusion of electronic links from the Contribution to third party material where-ever it may be located; and, vi) licence any third party to do any or all of the above.

## Abstract

**Objective:** To assess ~~the short-term impact of the 2008 recession on changes differences in~~ population mental health ~~before and after following the 2008 recession~~ and explore how and why ~~its these changes impact may~~ differ by gender, age and socio-economic position.

**Design:** Repeat cross-sectional analysis of survey data

**Setting:** England

**Participants:** Representative samples of the working age (25-64 years) general population participating in the Health Survey for England between 1991 and 2010 inclusive.

**Main Outcome Measures:** Prevalence of poor mental health (caseness) as measured by the General Health Questionnaire-12 (GHQ)

**Results:** Age-sex standardised prevalence of GHQ caseness increased from 13.7% (95% CI 12.9-14.5%) in 2008 to 16.4% (95% CI 14.9-17.9%) in 2009 and 15.5% (95% CI 14.4-16.7%) in 2010. Women had a consistently greater prevalence since 1991 until the current recession. However, compared to 2008, men experienced an increase in age-adjusted caseness of 5.1% (95% CI 2.6-7.6%,  $p < 0.001$ ) in 2009 and 3.0% (95% CI 1.2-4.9%,  $p = 0.001$ ) in 2010, while no statistically significant changes were seen in women. Adjustment for differences in employment status and education level did not account for the observed increase in men nor did they explain the differential gender patterning. Over the last decade, socio-economic inequalities showed a tendency to increase but no clear evidence for an increase in inequalities associated with the recession was found. Similarly, no evidence was found for a differential effect between age groups.

**Conclusions:** Population mental health in men has ~~been adversely affected/deteriorated~~ within two years of the onset of the current recession. These changes, and their patterning by gender, could not be accounted for by differences in employment status. Further work is needed to monitor recessionary impacts on health inequalities in response to ongoing labour market and social policy changes.

Words: 2757

### **What is already known on this subject?**

Previous studies have found differing impacts of recession on mental health, with some outcomes, such as suicide, increasing in men more than women. However, as the labour market changes and employment among women becomes increasingly important, it has been suggested that this gender difference may no longer exist. Few studies have investigated mental health morbidity and its patterning by population subgroups over prolonged periods of time.

### **What this study adds**

~~The current recession is associated with~~ There has been an increase in the prevalence of poor mental health among men in England in the two years after the start of the current recession. These changes, and their patterning by gender, cannot be accounted for by differences in employment status over time.

### **Article Focus**

- Previous studies have found differing impacts of recession on mental health, with some deteriorations in health outcomes (such as suicide) being worse in men than women.
- Few studies have investigated mental health morbidity and its patterning by population subgroups over prolonged periods of time.
- We assess short-term changes in population mental health and inequalities (by gender, age and socio-economic position) following the recent recession, by placing it in a longer historical context.

### **Key Messages**

- Population mental health in men has deteriorated within two years of the onset of the current recession.
- These changes in population mental health, and their patterning by gender, cannot be accounted for by differences in employment status over time.

### **Strengths & Limitations**

- Our study uses a large nationally representative dataset to assess trends over a long length of time and an outcome likely to be sensitive to changes in the macro-economic environment.
- We assess trends across a number of dimensions (and measures) of inequality, helping to address an important gap in the current literature.
- Establishing causality from this research is difficult given the cross-sectional (rather than longitudinal) nature of the surveys and lack of available data for some time periods.



## Introduction

Macro-economic factors are known to influence population health and health inequalities<sup>1</sup>. The onset of the global economic downturn heralded by the collapse of Lehman Brothers in September 2008 can therefore be considered a potential threat to public health<sup>2-4</sup>. In the UK, national gross domestic product (GDP) has fallen in real terms (with a 5.5% fall per head of population between 2008 and 2009) and unemployment rates have increased since the recession began<sup>5</sup>. Neither indicator has yet recovered to pre-recession levels at the time of writing<sup>6</sup>. Unemployment is associated with a number of adverse health impacts including poor mental health, short-term increases in adverse health behaviours and increased mortality risk<sup>7-9</sup>. However, the effects of recession appear to be more complex than would be expected from the impact of increases in unemployment alone. For example, there is a growing body of research suggesting that at least in the short term, recessions are associated with a faster decline in mortality although some specific causes of death, such as suicide, may rise<sup>10</sup>. Thus, mortality impacts of recessions may be more complex than intuition suggests and likely vary by outcome and context<sup>4,7</sup>.

Less empirical analysis has focused on the effect of recession on trends in population mental health. Macro-economic change could potentially have a more rapid effect on mental health compared to mortality, particularly for those of working age. Historically, both periods of recession and unemployment appear to have had a greater impact on men compared to women<sup>7</sup>. However, it has been suggested that this differential impact may no longer be present as growing female labour market participation may increase their susceptibility to macro-economic changes<sup>11,12</sup>. In addition, it is not clear to what extent changes in health status associated with recessionary periods are mediated purely through changes in labour market status. The UK experienced its first recession since 1991 (defined as two quarters of negative growth in gross domestic product) in late 2008<sup>13</sup>. Unemployment (which is commonly used as a marker of recession that has a more direct effect on health) showed marked increases between 1991-3 and 2008-10.

In this paper, we aim to assess ~~the short-term impact of the recent recession on~~ changes in population mental health and inequalities (by gender, age and socio-economic position) following the onset of the recent recession by placing it in a longer historical context. We further aim to investigate to what extent any observed ~~recessionary impacts~~ associations and their patterning by subgroups can be accounted for by differences in employment status ~~and/or~~ education level.

## Methods

### Data sources

We used data from the Health Survey for England, a nationally representative cross-sectional survey of the community dwelling population, conducted annually from 1991 onwards. Survey methodology has been described elsewhere<sup>14-16</sup>. Household response rates for the period studied varied from 85% in 1991 to 64% in 2008.

1  
2  
3 Unemployment rates (available for the whole period) and gross GDP per head  
4 (comparable data available for 1991-2009) for the UK were retrieved to provide  
5 context for the interpretation of trends<sup>5 17</sup>. In addition, unemployment data for  
6 England (available for 1993 onwards) were retrieved and showed similar trends to the  
7 UK data<sup>18</sup>. These macro-economic indicators all show marked deterioration between  
8 2008 and 2009; hence we use 2008 as the reference year for comparison.  
9

### 10 11 Population

12  
13  
14 The general population samples from the Health Surveys for England were used for  
15 all analyses. The study population was restricted to participants of a working age,  
16 between 25 years and 64 years inclusive. Those aged under 25 years were excluded to  
17 minimise misclassification of education level. Participants missing any data on age,  
18 sex, highest education level, employment status and outcome were excluded from the  
19 analysis (5.15% of total sample excluded). We excluded 2918 participants (2.59% of  
20 the sample) with foreign/other qualifications as we were unable to categorise their  
21 highest educational attainment accurately. We excluded 847 individuals (0.75%) who  
22 defined themselves as doing unpaid work for their family, waiting to take up  
23 employment or undertaking government training schemes. Results of overall  
24 prevalence estimates were similar when those with missing data (apart from the  
25 1.60% missing outcome data) were included. Similar results were also obtained when  
26 the population was limited to those aged 25-59 years, to investigate the potential for  
27 gender differentials arising from a younger age of retirement among women.  
28  
29

### 30 31 Exposures

32 Socio-economic position was assessed using highest education level (self-reported)  
33 and area-level deprivation. Comparable information on education level was available  
34 for every survey year except 1995 and 1996 and area-level deprivation was available  
35 from 2001 onwards. Educational level was coded into four categories: degree-level or  
36 equivalent qualifications, A-level or equivalent, GCSE or equivalent and no  
37 qualifications, while the index of multiple deprivation (IMD) was coded into  
38 quintiles. Participants were asked to self-identify their employment status based on  
39 their activity in the previous week before the survey interview. Employment status  
40 was coded into six categories: employed, unemployed, unable to work due to ill  
41 health, looking after family/maternity care, retired and in full-time education.  
42

43 Equivalised household income (coded into quintiles and in a sensitivity analysis as a  
44 continuous variable) was analysed for the years 2000 onwards in an exploratory  
45 analysis.  
46

### 47 48 Outcome Measures

49 Mental health was assessed in every survey year except 1996 and 2007 through the  
50 general health questionnaire (GHQ-12). GHQ-12 is a screening tool for anxiety and  
51 depression, validated for use in epidemiological studies<sup>19</sup>. Respondents scoring 4 or  
52 more have a high likelihood of poor mental health and are considered a 'case'<sup>20</sup>.  
53

### 54 55 Statistical Analysis

56 For the first stage of analysis, we analysed data for each year separately. Prevalence  
57 estimates for GHQ caseness (age-sex standardisation to the WHO European standard  
58  
59  
60

1  
2  
3 population) were calculated for each year, stratified by age, sex, education level and  
4 employment status.

5  
6 In the second stage of analysis, logistic regression analysis was conducted for each  
7 year separately to explore any differential patterning in recession years between men  
8 and women. To measure the extent of socio-economic inequality in prevalence on a  
9 relative scale we calculated the relative index of inequality using a Poisson modelling  
10 approach [15].  
11

12  
13 We directly tested the impact of the recent recession in the final stage of the analysis  
14 by creating a combined dataset for all years and creating a logistic regression model  
15 adjusting for year, age, education level and employment status. Men and women were  
16 analysed separately given the effect modification observed between genders and year.  
17 [A final stage of analysis investigated if equivalised household income helped explain](#)  
18 [differences in GHQ prevalence before and after the recession.](#)  
19

20  
21 All analyses were carried out using Stata v11.2. Weights for non-response (available  
22 from 2003 onwards) were used for all analyses. These were scaled to a mean of 1 for  
23 each year to allow analysis of the combined dataset. Robust standard errors were used  
24 to adjust for survey clustering at the area level. Adjusted prevalence differences were  
25 derived from the logistic regression models as well as odds ratios in order to allow  
26 comparisons across models to be made on the absolute scale <sup>21</sup>.  
27

## 28 29 30 **Results**

31  
32 A total of 106,985 participants were included in the main analysis of trends in GHQ  
33 caseness (Table 1). The sample response rate declined gradually over time, but they  
34 were broadly comparable over the most recent years with no marked changes in  
35 response rates during the onset of the current recession. There was also socio-  
36 economic change with a decline in the percentage of people with no qualifications and  
37 an increase in participants with a degree.  
38

39  
40 GHQ caseness was relatively high during the time of the early 1990s recession  
41 (Figure 1). Since then, there has been an indication of a general downward trend with  
42 some variability, until a more recent increase in prevalence that occurs after 2008.  
43 Caseness increased from 13.7% (95% CI 12.9-14.5%) in 2008 to 16.4% (95% CI  
44 14.9-17.9%) in 2009.  
45

## 46 **Impact by Subgroups**

47  
48 A gender differential in GHQ caseness is apparent; women have a consistently higher  
49 prevalence over most of the time period (Figure 2). However, during the early 1990s  
50 recession, men had a larger increase in prevalence of GHQ caseness from 12.3% in  
51 1991 to 14.5% in 1992. A similar trend is seen following the 2008 recession with an  
52 increase from 11.3% to 16.6% in men, compared to 16.0% to 16.2% in women  
53 between 2008 and 2009.  
54  
55  
56  
57  
58  
59  
60

1  
2  
3 Stratified analysis by age shows that changes in mental health during recessionary  
4 periods are not confined to any specific age groups (see on-line appendix). Sensitivity  
5 analysis including those aged 16-24 years showed no clear difference in trends.  
6

7  
8 In the early 1990s, stratification by education level reveals an initial reverse education  
9 gradient in GHQ caseness (Figure 3). Over time, a growing disparity in GHQ  
10 caseness between those most and least educated is apparent, with the highest levels of  
11 inequality in poor mental health observed in 2005. A similar pattern is seen when  
12 assessing caseness by area-level deprivation (Figure 4). The greatest levels of relative  
13 indices of inequality are also seen since 2005 when assessed by either measure of  
14 socio-economic position (Figure 5). No significant ~~differences before and after impact~~  
15 ~~of~~ the recession by area-level deprivation are observed.  
16

17  
18 Changes in population mental health do not appear to be entirely mediated by changes  
19 in employment status. For example, the prevalence of GHQ caseness amongst those in  
20 employment increased during both recessionary periods: from 13.4% (95% CI 11.4-  
21 15.5%) to 14.8% (95% CI 13.1-16.6%) in 1991-2 and from 9.9% (95% CI 9.2-10.7%)  
22 to 12.9% (11.3-14.4%) between 2008 and 2009 (Figure 6).  
23  
24

### 25 **Exploration of the Differential Trends by Gender**

26  
27 A combined dataset for all years was analysed separately for men and women, given  
28 the effect modification observed. Compared to a baseline of 2008, age-adjusted  
29 caseness increased by 5.1% (95% 2.6-7.6%,  $p < 0.001$ ) in 2009 and 3.0% (95% 1.2-  
30 4.9%,  $p = 0.001$ ) in 2010 amongst men but no statistically significant changes are seen  
31 in women (Table 2 and Web Tables A-B). Adding employment status to the model  
32 suggests that changes in employment status do not explain this increase in poor  
33 mental health. Similarly, adjustment for changes in employment status and education  
34 level does not account for this increase in prevalence. Finally, adjustment for  
35 equivalised household income in a post-hoc exploratory analysis also did not explain  
36 changes in prevalence (see Web Table C).  
37  
38

39  
40 We attempted to explore the reasons for the ~~increased~~-adverse ~~effect of~~ changes in the  
41 years following the recession among men. When analysing data from each year  
42 separately, adjustment for differences in education level and employment status  
43 between genders did not account for the larger increases in prevalence amongst men  
44 (see Table 3). Therefore, the differing trend in mental health in men ~~cannot appear~~  
45 not to be explained by differing changes in labour market status.  
46  
47

### 48 **Discussion**

49  
50 In this large repeat cross-sectional study of representative samples of the English  
51 population, we have found evidence to suggest population mental health has  
52 deteriorated in men following the start of the 2008 recession. Notably, this change  
53 does not appear to arise only as a result of an increase in unemployment, but mental  
54 health appears to have declined among those in employment. Household income also  
55 does not account for the observed trend in mental health. While some commentators  
56 have recently suggested that the current recession may affect both genders in a similar  
57  
58  
59  
60

manner, we find that the deterioration in mental health appears only greatest amongst men. Furthermore, this differential impact-association cannot be adequately accounted for by changes in employment status (such as greater unemployment) amongst men. We also find evidence to suggest that socio-economic inequalities (assessed by both highest education level and area-level deprivation) have increased over the course of the last decade, but the recession has not been associated with a widening of had a clear impact on socio-economic inequalities in mental health to date by the year 2010.

Our study has a number of strengths. We used a large nationally representative dataset which used a validated screening test for anxiety and depression. Importantly, we assessed trends over a long length of time with annual measures available for most of the period and an outcome likely to be sensitive to changes in the macro-economic environment. This allows greater certainty in attribution compared to studies limited to comparisons of single before and after surveys. However, a

As our study makes use of available data, a number of important limitations exist. First, data was not available for every year, with the omission of GHQ in 2007 potentially problematic as this represents the last full pre-recessionary year. Second, our outcome measure does not equate to a clinically defined mental health condition. It cannot therefore be assumed that changes in GHQ caseness correlate with clinically diagnosed illness. Third, we have been limited to repeat cross-sectional analysis. Longitudinal analysis of individuals would allow greater scope for relating changes in individual employment status to health. Third, while we have chosen a validated outcome measure, it is possible that framing effects could account for some of the observed changes. In particular, GHQ items were asked first in the self-completion questionnaire in 1999, 2002 and 2009, all years with a high prevalence. However, the sustained higher prevalence following 2008 among for men remains in 2010 striking. Fourth, defining recessionary periods and exploring their effects are notoriously difficult. We have studied changes over time period but did not directly incorporate macro-economic measures into our analysis. In addition, we have only been able to investigate a few of the potential pathways between recession and mental health. Further work is needed to explore other pathways such as temporary employment and increased job insecurity. Lastly, while-although our study has attempted to investigated the impact of changes in population mental health associated with the recession, we cannot establish whether this is a causal relationship, as other temporal changes could account for the observed trends. However, many factors that could potentially account for our findings, such as changes in health or social care provision, could also be considered mediating factors rather than confounders.

Much previous research has focussed on mortality, and in particular suicide, associated with recession. In an analysis of cause-specific mortality and its association with recession in European countries, Stuckler et al. found that the most consistently observed relationship was an increase in suicide amongst young men<sup>22</sup>. More recently, they found that increases in suicide rates have been observed across European countries following the onset of the current recession<sup>23</sup>. Consistent increases in male suicide rates have been noted in many other studies<sup>24</sup>. The relationships between morbidity in mental health, health inequalities and recessions are less well understood and findings differ between studies<sup>7,25</sup>. A recent before and after comparison of patients attending primary care services in Spain found a marked increase in the prevalence of mental health disorders following the onset of the

1  
2  
3 current global recession<sup>26</sup>. Household unemployment and mortgage difficulties were  
4 particularly associated with these attendances. However, not all studies have found an  
5 ~~negative association between~~effect of economic recession ~~on and~~ mental health. For  
6 example, Vinamaki et al found no statistically significant increase in poor mental  
7 health (assessed using GHQ) following the economic recession in Finland between  
8 1993 to 1995 in repeated general population samples<sup>27</sup>.  
9

10  
11 While our study finds men's mental health ~~has been affected~~ has declined while more  
12 adversely than women's has not, it should be noted that important indirect effects of  
13 the recession, including changes in the public sector workforce and changes in  
14 government assistance for children, had yet to be implemented during the time of this  
15 study. Our analysis does not yet show any indication of worsening mental health  
16 inequalities associated with the current recession. However, there is a general trend  
17 towards a greater level of inequality more recently and there is no evidence to suggest  
18 narrowing. Further research will be required to assess ongoing impacts of the  
19 recession by gender and socio-economic position. As our analysis was restricted to a  
20 working-age population, research focussing on retired individuals is also needed to  
21 investigate the potential impact in older age groups. The existing evidence suggests  
22 that the relationship between mental health and recessions differs, at least in part, by  
23 social welfare system<sup>10 22 28-31</sup>. There is therefore a need for cross-national  
24 comparisons of trends in population health and health inequalities to better identify  
25 social policy responses that protect from ~~the any~~ adverse health impacts of recession.  
26  
27

28  
29 The finding that mental health across the general population has ~~been adversely~~  
30 ~~impacted by deteriorated following~~ the recession's onset, and this association does not  
31 appear to be limited to those out of employment nor those whose household income  
32 has declined, has important implications. Previous research has highlighted the  
33 importance of job insecurity, rather than solely employment status, as potentially  
34 resulting in adverse effects on mental health<sup>32</sup>. One potential explanation for our  
35 results would be that job insecurity during the current recession is responsible for the  
36 deterioration in mental health with men's psychological health remaining more  
37 affected by economic fluctuations despite greater female labour market participation.  
38 This paper highlights the continuing importance of addressing mental health issues  
39 using population-wide approaches by both policymakers and health professionals and  
40 not limiting such efforts to those directly affected by unemployment.  
41  
42  
43  
44  
45

#### 46 Acknowledgements

47  
48 We would like to acknowledge the assistance of the UK Data Archive for providing  
49 access to the data; the Information Centre for health and social care and Department  
50 of Health for sponsoring the Health Survey for England; and the Principal  
51 Investigators of the Health Survey for England, Natcen Social Research and the  
52 Department of Epidemiology and Public Health at the Royal Free and University  
53 College Medical School. In addition, we would like to thank Geoff Der at the  
54 MRC/CSO Social & Public Health Sciences Unit for providing statistical advice. The  
55 responsibility for the analysis presented here lies solely with the authors.  
56  
57  
58  
59  
60

1  
2  
3  
4  
5  
6  
7  
8  
9  
10  
11  
12  
13  
14  
15  
16  
17  
18  
19  
20  
21  
22  
23  
24  
25  
26  
27  
28  
29  
30  
31  
32  
33  
34  
35  
36  
37  
38  
39  
40  
41  
42  
43  
44  
45  
46  
47  
48  
49  
50  
51  
52  
53  
54  
55  
56  
57  
58  
59  
60

For peer review only

Table 1: characteristics of study participants

| Year | Sex (%) |      | Age group (%) |       |       |       | Highest education level (%) |         |      |      | Employment status in last week (%) |            |                               |         |                    | Sample | Response rate (%) |              |
|------|---------|------|---------------|-------|-------|-------|-----------------------------|---------|------|------|------------------------------------|------------|-------------------------------|---------|--------------------|--------|-------------------|--------------|
|      | M       | F    | 25-34         | 35-44 | 45-54 | 55-64 | Degree                      | A-level | GCSE | None | Employed                           | Unemployed | Not working due to ill health | Retired | Looking after home |        |                   | In education |
| 1991 | 46.7    | 53.3 | 29.8          | 27.5  | 21.8  | 20.8  | 11.8                        | 18.7    | 33.4 | 36.0 | 71.9                               | 5.5        | 4.5                           | 4.5     | 13.1               | 0.5    | 2,001             | 85           |
| 1992 | 47.3    | 52.7 | 29.2          | 28.4  | 22.6  | 19.8  | 11.8                        | 22.0    | 35.6 | 30.6 | 69.3                               | 6.1        | 4.4                           | 6.1     | 13.0               | 1.1    | 2,484             | 82           |
| 1993 | 47.5    | 52.5 | 29.7          | 26.6  | 24.3  | 19.4  | 12.8                        | 21.7    | 33.3 | 32.2 | 70.9                               | 6.3        | 4.3                           | 5.5     | 12.4               | 0.6    | 10,502            | 81           |
| 1994 | 46.7    | 53.3 | 30.2          | 27.3  | 23.1  | 19.5  | 13.0                        | 21.9    | 34.4 | 30.7 | 70.9                               | 5.5        | 4.5                           | 5.8     | 12.4               | 1.0    | 9,981             | 77           |
| 1997 | 47.2    | 52.8 | 29.1          | 27.4  | 25.0  | 18.5  | 16.4                        | 24.8    | 31.2 | 27.6 | 71.7                               | 3.3        | 6.4                           | 4.8     | 12.8               | 1.1    | 5,377             | 76           |
| 1998 | 46.6    | 53.4 | 28.4          | 27.5  | 25.2  | 18.9  | 16.6                        | 24.1    | 33.0 | 26.3 | 73.4                               | 2.0        | 6.1                           | 5.4     | 11.6               | 1.4    | 9,748             | 74           |
| 1999 | 46.9    | 53.1 | 26.5          | 29.0  | 25.6  | 18.9  | 18.0                        | 25.0    | 31.1 | 26.0 | 72.3                               | 2.3        | 6.6                           | 5.1     | 12.3               | 1.4    | 4,750             | 76           |
| 2000 | 45.8    | 54.2 | 26.8          | 30.3  | 23.3  | 19.6  | 18.9                        | 27.3    | 31.0 | 22.8 | 72.3                               | 2.1        | 6.6                           | 5.8     | 11.6               | 1.6    | 4,982             | 75           |
| 2001 | 45.7    | 54.3 | 24.9          | 29.6  | 25.3  | 20.2  | 19.6                        | 26.1    | 32.6 | 21.6 | 73.3                               | 2.0        | 6.4                           | 6.2     | 10.3               | 1.7    | 9,457             | 74           |
| 2002 | 43.4    | 56.6 | 25.7          | 31.8  | 22.7  | 19.8  | 21.0                        | 27.9    | 32.7 | 18.5 | 71.4                               | 2.1        | 5.6                           | 6.0     | 13.6               | 1.4    | 4,619             | 74           |
| 2003 | 45.4    | 54.6 | 23.3          | 29.7  | 23.8  | 23.2  | 21.8                        | 25.8    | 32.5 | 19.8 | 74.6                               | 1.6        | 6.1                           | 6.3     | 10.2               | 1.4    | 8,982             | 73           |
| 2004 | 43.4    | 56.6 | 22.5          | 29.2  | 23.6  | 24.8  | 23.0                        | 25.7    | 29.8 | 21.5 | 73.0                               | 1.4        | 5.9                           | 7.4     | 10.7               | 1.6    | 4,076             | 72           |
| 2005 | 44.8    | 55.2 | 22.5          | 26.6  | 26.5  | 24.4  | 23.6                        | 25.9    | 30.1 | 20.5 | 73.8                               | 1.7        | 6.3                           | 6.2     | 10.6               | 1.4    | 4,590             | 74           |
| 2006 | 44.7    | 55.3 | 21.2          | 28.8  | 24.9  | 25.2  | 25.5                        | 26.8    | 29.2 | 18.5 | 73.9                               | 1.8        | 5.9                           | 6.8     | 10.3               | 1.3    | 8,605             | 68           |
| 2008 | 44.7    | 55.3 | 22.0          | 27.5  | 25.2  | 25.3  | 25.6                        | 28.0    | 28.7 | 17.7 | 74.0                               | 2.1        | 5.4                           | 7.4     | 9.6                | 1.6    | 9,228             | 64           |
| 2009 | 45.6    | 54.4 | 21.7          | 28.8  | 25.0  | 24.6  | 26.4                        | 25.6    | 30.9 | 17.0 | 73.4                               | 3.1        | 5.5                           | 7.4     | 9.0                | 1.7    | 2,773             | 68           |
| 2010 | 43.5    | 56.5 | 21.3          | 26.5  | 27.6  | 24.6  | 28.2                        | 28.3    | 29.7 | 13.9 | 73.1                               | 3.1        | 5.8                           | 7.4     | 9.0                | 1.6    | 4,830             | 66           |



1  
2  
3  
4  
5  
6  
7  
8  
9  
10  
11  
12  
13  
14  
15  
16  
17  
18  
19  
20  
21  
22  
23  
24  
25  
26  
27  
28  
29  
30  
31  
32  
33  
34  
35  
36  
37  
38  
39  
40  
41  
42  
43  
44  
45  
46  
47  
48  
49

Table 2: Analysis of Data from 1991-2010 in Men and Women Adjusted for Age, Employment Status and Education (Selected Years Shown)

|                | Model 1: Age |       |              |              | Model 2: Age + Employment Status |       |              |              | Model 3: Age + Employment Status + Education |       |              |              |
|----------------|--------------|-------|--------------|--------------|----------------------------------|-------|--------------|--------------|----------------------------------------------|-------|--------------|--------------|
| <b>Males</b>   |              |       |              |              |                                  |       |              |              |                                              |       |              |              |
| Year           | OR           | P     | Lower 95% CI | Upper 95% CI | OR                               | P     | Lower 95% CI | Upper 95% CI | OR                                           | P     | Lower 95% CI | Upper 95% CI |
| 2005           | 0.97         | 0.723 | 0.82         | 1.15         | 0.92                             | 0.370 | 0.78         | 1.10         | 0.93                                         | 0.394 | 0.78         | 1.10         |
| 2006           | 1.06         | 0.465 | 0.91         | 1.22         | 1.05                             | 0.511 | 0.91         | 1.22         | 1.05                                         | 0.506 | 0.91         | 1.22         |
| 2008           | 1.00         | -     | -            | -            | 1.00                             | -     | -            | -            | 1.00                                         | -     | -            | -            |
| 2009           | 1.53         | 0.000 | 1.26         | 1.86         | 1.50                             | 0.000 | 1.24         | 1.82         | 1.50                                         | 0.000 | 1.24         | 1.82         |
| 2010           | 1.31         | 0.001 | 1.12         | 1.54         | 1.31                             | 0.001 | 1.11         | 1.54         | 1.30                                         | 0.002 | 1.10         | 1.53         |
|                |              |       |              |              |                                  |       |              |              |                                              |       |              |              |
|                | % difference | P     | Lower 95% CI | Upper 95% CI | % difference                     | P     | Lower 95% CI | Upper 95% CI | % difference                                 | P     | Lower 95% CI | Upper 95% CI |
| 2005           | -0.31        | 0.722 | -2.02        | 1.40         | -0.75                            | 0.367 | -2.12        | 1.32         | -0.71                                        | 0.391 | -2.34        | 0.92         |
| 2006           | 0.56         | 0.465 | -0.95        | 2.08         | 0.49                             | 0.511 | -0.97        | 2.09         | 0.50                                         | 0.506 | -0.96        | 1.95         |
| 2008           | 0.00         | -     | -            | -            | 0.00                             | -     | -            | -            | 0.00                                         | -     | -            | -            |
| 2009           | 5.07         | 0.000 | 2.60         | 7.55         | 4.54                             | 0     | 2.67         | 7.65         | 4.52                                         | 0.000 | 2.21         | 6.83         |
| 2010           | 3.04         | 0.001 | 1.17         | 4.91         | 2.86                             | 0.002 | 1.32         | 5.13         | 2.79                                         | 0.002 | 1.01         | 4.56         |
|                |              |       |              |              |                                  |       |              |              |                                              |       |              |              |
| <b>Females</b> |              |       |              |              |                                  |       |              |              |                                              |       |              |              |
|                | OR           | P     | Lower 95% CI | Upper 95% CI | OR                               | P     | Lower 95% CI | Upper 95% CI | OR                                           | P     | Lower 95% CI | Upper 95% CI |

1  
2  
3  
4  
5  
6  
7  
8  
9  
10  
11  
12  
13  
14  
15  
16  
17  
18  
19  
20  
21  
22  
23  
24  
25  
26  
27  
28  
29  
30  
31  
32  
33  
34  
35  
36  
37  
38  
39  
40  
41  
42  
43  
44  
45  
46  
47  
48  
49

|             |                     |          |                     |                     |                     |          |                     |                     |                     |          |                     |                     |
|-------------|---------------------|----------|---------------------|---------------------|---------------------|----------|---------------------|---------------------|---------------------|----------|---------------------|---------------------|
| <b>2005</b> | 1.01                | 0.917    | 0.88                | 1.15                | 1.00                | 0.958    | 0.88                | 1.15                | 1.00                | 0.956    | 0.88                | 1.15                |
| <b>2006</b> | 0.96                | 0.467    | 0.86                | 1.07                | 0.95                | 0.342    | 0.85                | 1.06                | 0.95                | 0.344    | 0.85                | 1.06                |
| <b>2008</b> | 1.00                | -        | -                   | -                   | 1.00                | -        | -                   | -                   | 1.00                | -        | -                   | -                   |
| <b>2009</b> | 1.04                | 0.641    | 0.88                | 1.23                | 1.06                | 0.522    | 0.90                | 1.24                | 1.06                | 0.523    | 0.90                | 1.24                |
| <b>2010</b> | 1.06                | 0.369    | 0.93                | 1.22                | 1.05                | 0.493    | 0.91                | 1.20                | 1.05                | 0.482    | 0.92                | 1.20                |
|             |                     |          |                     |                     |                     |          |                     |                     |                     |          |                     |                     |
|             | <b>% difference</b> | <b>P</b> | <b>Lower 95% CI</b> | <b>Upper 95% CI</b> | <b>% difference</b> | <b>P</b> | <b>Lower 95% CI</b> | <b>Upper 95% CI</b> | <b>% difference</b> | <b>P</b> | <b>Lower 95% CI</b> | <b>Upper 95% CI</b> |
| <b>2005</b> | 0.09                | 0.918    | -1.69               | 1.88                | 0.05                | 0.959    | -1.70               | 1.79                | 0.05                | 0.956    | -1.69               | 1.79                |
| <b>2006</b> | -0.55               | 0.467    | -2.04               | 0.94                | -0.70               | 0.341    | -2.13               | 0.74                | -0.69               | 0.344    | -2.13               | 0.74                |
| <b>2008</b> | 0.00                | -        | -                   | -                   | 0.00                | -        | -                   | -                   | 0.00                | -        | -                   | -                   |
| <b>2009</b> | 0.53                | 0.643    | -1.70               | 2.76                | 0.70                | 0.526    | -1.48               | 2.89                | 0.70                | 0.527    | -1.48               | 2.88                |
| <b>2010</b> | 0.84                | 0.372    | -1.01               | 2.70                | 0.63                | 0.495    | -1.18               | 2.43                | 0.64                | 0.485    | -1.16               | 2.44                |

\* Reference group is 2008. Selected years around the current recession shown but analyses for all years available in the on-line appendix.

CI = Confidence Interval

OR = Odds Ratio

P = P value

View Only

Table 3: Odds ratio and % difference for GHQ caseness by year for women

| Year | Model 1 (age adjusted) |       |                       | Model 2 (adjusted for age, education level and employment status) |       |                       |
|------|------------------------|-------|-----------------------|-------------------------------------------------------------------|-------|-----------------------|
|      | OR (95% CI)*           | P     | % difference (95% CI) | OR (95% CI)*                                                      | P     | % difference (95% CI) |
| 1991 | 1.75 (1.40 to 2.20)    | 0.000 | 7.34 (4.40 to 10.27)  | 1.81 (1.39 to 2.36)                                               | 0.000 | 7.53 (4.30 to 10.75)  |
| 1992 | 1.46 (1.16 to 1.84)    | 0.001 | 5.31 (2.14 to 8.48)   | 1.59 (1.25 to 2.02)                                               | 0.000 | 6.32 (3.10 to 9.54)   |
| 1993 | 1.43 (1.29 to 1.57)    | 0.000 | 4.87 (3.52 to 6.22)   | 1.55 (1.39 to 1.73)                                               | 0.000 | 5.83 (4.37 to 7.30)   |
| 1994 | 1.61 (1.45 to 1.78)    | 0.000 | 6.32 (4.98 to 7.66)   | 1.77 (1.58 to 1.99)                                               | 0.000 | 7.33 (5.90 to 8.76)   |
| 1997 | 1.59 (1.38 to 1.84)    | 0.000 | 6.17 (4.27 to 8.06)   | 1.68 (1.43 to 1.96)                                               | 0.000 | 6.55 (4.62 to 8.49)   |
| 1998 | 1.47 (1.31 to 1.64)    | 0.000 | 4.98 (3.56 to 6.39)   | 1.58 (1.39 to 1.79)                                               | 0.000 | 5.64 (4.15 to 7.13)   |
| 1999 | 1.29 (1.11 to 1.50)    | 0.001 | 3.59 (1.50 to 5.67)   | 1.40 (1.19 to 1.65)                                               | 0.000 | 4.44 (2.30 to 6.59)   |
| 2000 | 1.47 (1.24 to 1.73)    | 0.000 | 4.63 (2.66 to 6.61)   | 1.61 (1.33 to 1.94)                                               | 0.000 | 5.22 (3.19 to 7.26)   |
| 2001 | 1.44 (1.28 to 1.62)    | 0.000 | 4.19 (2.85 to 5.53)   | 1.55 (1.37 to 1.77)                                               | 0.000 | 4.75 (3.38 to 6.13)   |
| 2002 | 1.41 (1.21 to 1.64)    | 0.000 | 4.73 (2.71 to 6.76)   | 1.51 (1.27 to 1.78)                                               | 0.000 | 5.32 (3.19 to 7.45)   |
| 2003 | 1.29 (1.14 to 1.45)    | 0.000 | 2.91 (1.52 to 4.29)   | 1.38 (1.20 to 1.58)                                               | 0.000 | 3.44 (1.99 to 4.88)   |
| 2004 | 1.35 (1.11 to 1.63)    | 0.002 | 3.37 (1.25 to 5.49)   | 1.40 (1.14 to 1.71)                                               | 0.001 | 3.51 (1.38 to 5.65)   |
| 2005 | 1.52 (1.29 to 1.80)    | 0.000 | 4.85 (2.97 to 6.72)   | 1.68 (1.40 to 2.03)                                               | 0.000 | 5.46 (3.57 to 7.35)   |
| 2006 | 1.33 (1.18 to 1.49)    | 0.000 | 3.29 (1.92 to 4.67)   | 1.40 (1.22 to 1.60)                                               | 0.000 | 3.57 (2.18 to 4.96)   |
| 2008 | 1.46 (1.29 to 1.65)    | 0.000 | 4.41 (3.03 to 5.79)   | 1.54 (1.34 to 1.76)                                               | 0.000 | 4.52 (3.11 to 5.94)   |
| 2009 | 0.99 (0.79 to 1.24)    | 0.927 | -0.15 (-3.26 to 2.97) | 1.09 (0.86 to 1.39)                                               | 0.465 | 1.13 (-1.89 to 4.15)  |
| 2010 | 1.19 (1.01 to 1.39)    | 0.036 | 2.24 (0.16 to 4.32)   | 1.24 (1.04 to 1.48)                                               | 0.016 | 2.63 (0.52 to 4.75)   |

\* Reference group is men  
 CI = Confidence Interval  
 OR = Odds Ratio  
 P = P value



Figure 1: Overall prevalence of GHQ caseness and unemployment rate 1991 to 2010



Figure 2: Prevalence of GHQ caseness by gender 1991 to 2010



Figure 3: Prevalence of GHQ caseness by highest education level 1991 to 2010



Figure 4: Prevalence of GHQ caseness by area-level deprivation (index for multiple deprivation, IMD) 2001 to 2010



Figure 5: Relative Index of Inequality (RII) for GHQ Caseness as assessed education level and area-level deprivation (index for multiple deprivation, IMD) 1991 to 2010



Figure 6: GHQ caseness by employment status 1991 to 2010

## References

1. CSDH. Closing the gap in a generation: Health equity through action on the social determinants of health. Final report of the Commission on Social Determinants of Health. Geneva: World Health Organization, 2008.
2. BBC News. Q&A: Lehman Brothers bank collapse 2008.
3. Stuckler D, Basu S, McKee M, Suhrcke M. Responding to the economic crisis: a primer for public health professionals. *Journal of Public Health* 2010;32(3):298-306.
4. Stuckler D, Basu S, Suhrcke M, McKee M. The health implications of financial crisis: A review of the evidence. *Ulster Med J* 2009;78(3):142-45.
5. Carrera S, Beaumont J. Income and wealth - Social Trends 41. In: Beaumont J, editor. London: Office for National Statistics, 2011.
6. Office for National Statistics. GDP and the Labour Market, 2012 Q1 - May GDP update. London, 2012.
7. Bambra C. *Work, Worklessness and the Political Economy of Health*. Oxford: Oxford University Press, 2011.
8. Bambra C, Pope D, Swami V, Stanistreet D, Roskam A, Kunst A, et al. Gender, health inequalities and welfare state regimes: a cross-national study of thirteen European countries. *J Epidemiol Community Health* 2009;63(1):jech-070292.
9. Roelfs DJ, Shor E, Davidson KW, Schwartz JE. Losing life and livelihood: A systematic review and meta-analysis of unemployment and all-cause mortality. *Social Science & Medicine* 2011;72(6):840-54.
10. Bezruchka S. The effect of economic recession on population health. *Canadian Medical Association Journal* 2009;181(5):281-85.
11. Bambra C. Yesterday once more? Unemployment and health in the 21st century. *Journal of Epidemiology and Community Health* 2010;64(3):213-15.
12. Minton JW, Pickett KE, Dorling D. Health, employment, and economic change, 1973-2009: repeated cross sectional study. *BMJ* 2012;344.
13. Office for National Statistics. Impact of the recession on the labour market. London, 2009.
14. Mindell J, Biddulph JP, Hirani V, Stamatakis E, Craig R, Nunn S, et al. Cohort Profile: The Health Survey for England. *International Journal of Epidemiology* 2012.
15. Aresu M, Boodhna G, Bryson A, Bridges S, Chaudhury M, Craig R, et al. Health Survey for England 2010. Volume 2: Methods and Documentation. In: Craig R, Mindell J, editors. London: National Centre for Social Research, 2011.
16. Bennett N, Dodd T, Flatley J, editors. *A survey carried out by the Social Survey Division of OPCS on behalf of the Department of Health*. London: HMSO, 1995. London, 1995.
17. Spence A. Labour Market - Social Trends 41. In: Beaumont J, editor. London: Office for National Statistics, 2011.
18. Office for National Statistics. Regional labour market statistics, January 2012. London, 2012.
19. Goldberg DP, Gater R, Sartorius N, Ustun TB, Piccinelli M, Gureje O, et al. The validity of two versions of the GHQ in the WHO study of mental illness in general health care. *Psychological Medicine* 1997;27(01):191-97.

- 1
  - 2
  - 3
  - 4
  - 5
  - 6
  - 7
  - 8
  - 9
  - 10
  - 11
  - 12
  - 13
  - 14
  - 15
  - 16
  - 17
  - 18
  - 19
  - 20
  - 21
  - 22
  - 23
  - 24
  - 25
  - 26
  - 27
  - 28
  - 29
  - 30
  - 31
  - 32
  - 33
  - 34
  - 35
  - 36
  - 37
  - 38
  - 39
  - 40
  - 41
  - 42
  - 43
  - 44
  - 45
  - 46
  - 47
  - 48
  - 49
  - 50
  - 51
  - 52
  - 53
  - 54
  - 55
  - 56
  - 57
  - 58
  - 59
  - 60
20. Goldberg D, Williams P. *A User's Guide to the General Health Questionnaire*. Windsor: NFER-Nelson, 1988.
21. Mood C. Logistic Regression: Why We Cannot Do What We Think We Can Do, and What We Can Do About It. *European Sociological Review* 2010;26(1):67-82.
22. Stuckler D, Basu S, Suhrcke M, Coutts A, McKee M. The public health effect of economic crises and alternative policy responses in Europe: an empirical analysis. *The Lancet*;374(9686):315-23.
23. Stuckler D, Basu S, Suhrcke M, Coutts A, McKee M. Effects of the 2008 recession on health: a first look at European data. *The Lancet*;378(9786):124-25.
24. Zivin K, Paczkowski M, Galea S. Economic downturns and population mental health: research findings, gaps, challenges and priorities. *Psychological Medicine*;FirstView:1-6.
25. Riva M, Bambra C, Easton S, Curtis S. Hard times or good times? Inequalities in the health effects of economic change. *International Journal of Public Health* 2011;56(1):3-5.
26. Gili M, Roca M, Basu S, McKee M, Stuckler D. The mental health risks of economic crisis in Spain: evidence from primary care centres, 2006 and 2010. *The European Journal of Public Health* 2012.
27. Heimo Viinamäki JH, Osmo Kontula, Leo Niskanen, Kaj Koskela. Mental health at population level during an economic recession in Finland. *Nordic Journal of Psychiatry* 2000;54(3):177-82.
28. Sandra H. Economic stability and health status: Evidence from East Asia before and after the 1990s economic crisis. *Health Policy* 2006;75(3):347-57.
29. Stuckler D, Basu S, McKee M. Budget crises, health, and social welfare programmes. *BMJ* 2010;340.
30. Uutela A. Economic crisis and mental health. *Current Opinion in Psychiatry* 2010;23(2):127-30 10.1097/YCO.0b013e328336657d.
31. Lundin A, Hemmingsson T. Unemployment and suicide. *The Lancet* 2009;374(9686):270-71.
32. Ferrie JE, Shipley MJ, Marmot MG, Stansfeld S, Smith GD. Health effects of anticipation of job change and non-employment: longitudinal data from the Whitehall II study. *BMJ* 1995;311(7015):1264-69.



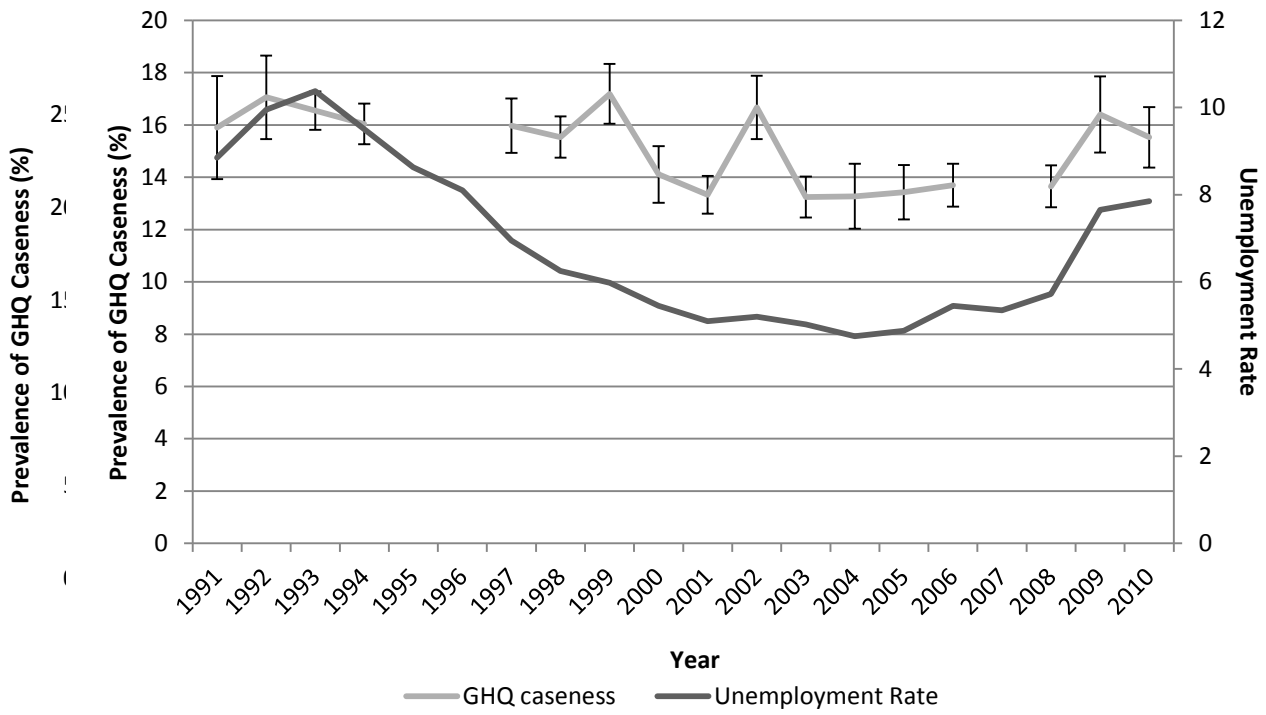

Figure 1: Overall prevalence of GHQ caseness and unemployment rate 1991 to 2010

Review only

Figure 2: Prevalence of GHQ caseness by gender 1991 to 2010

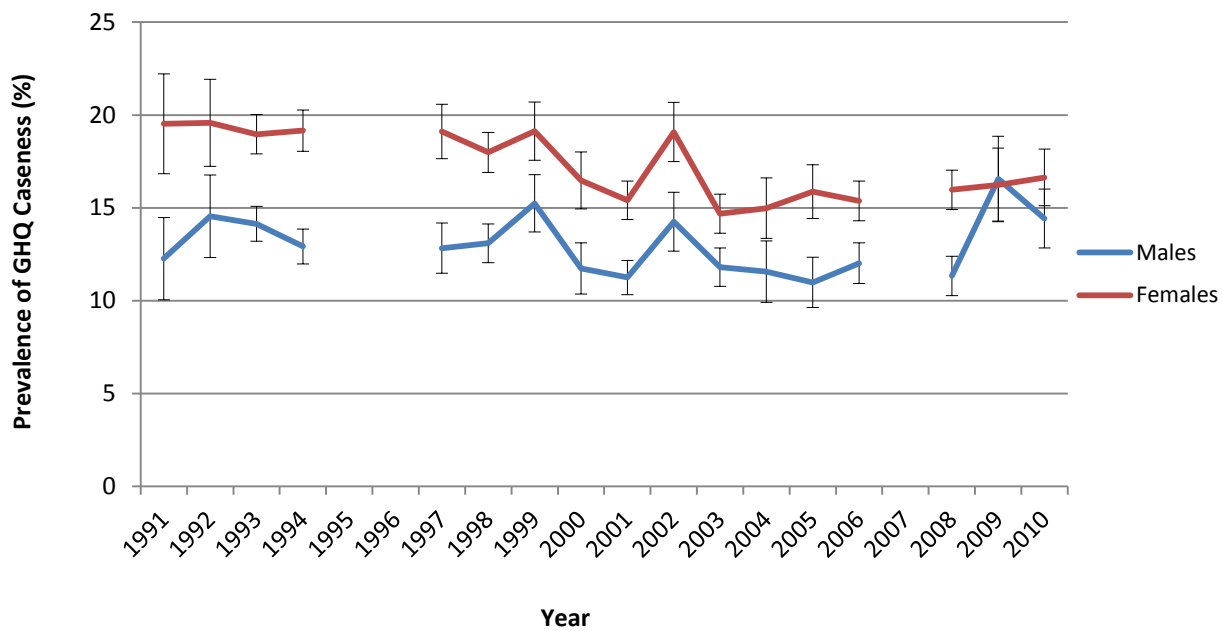

ew only

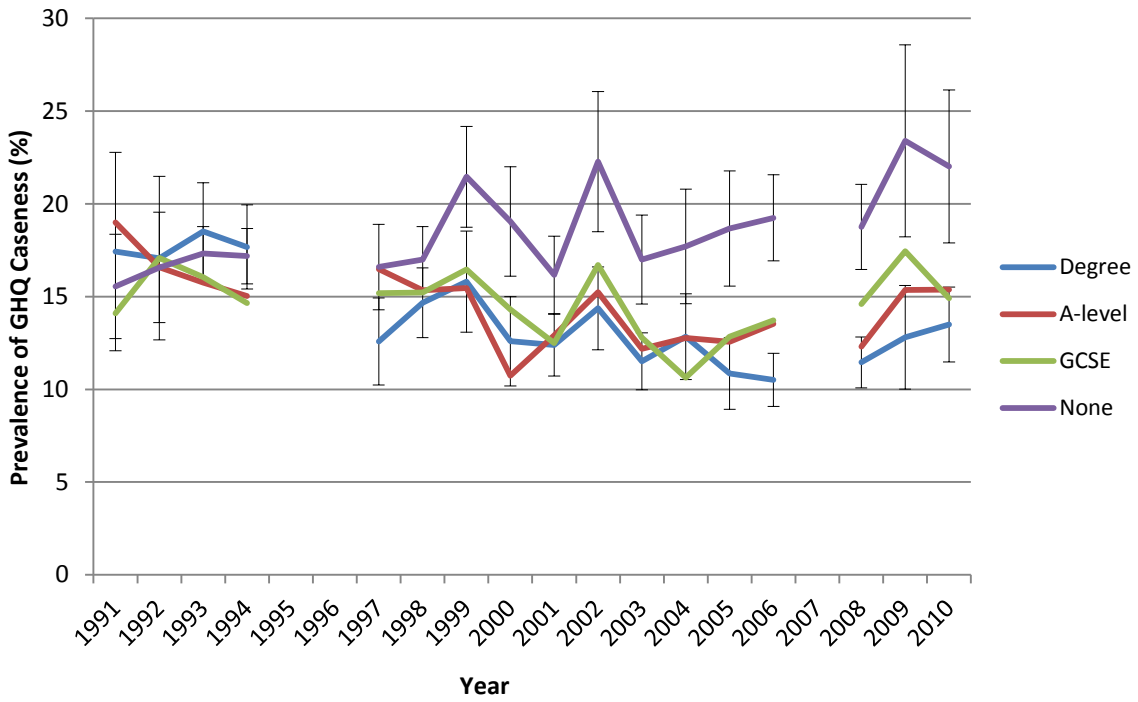

Figure 3: Prevalence of GHQ caseness by highest education level 1991 to 2010

Review only

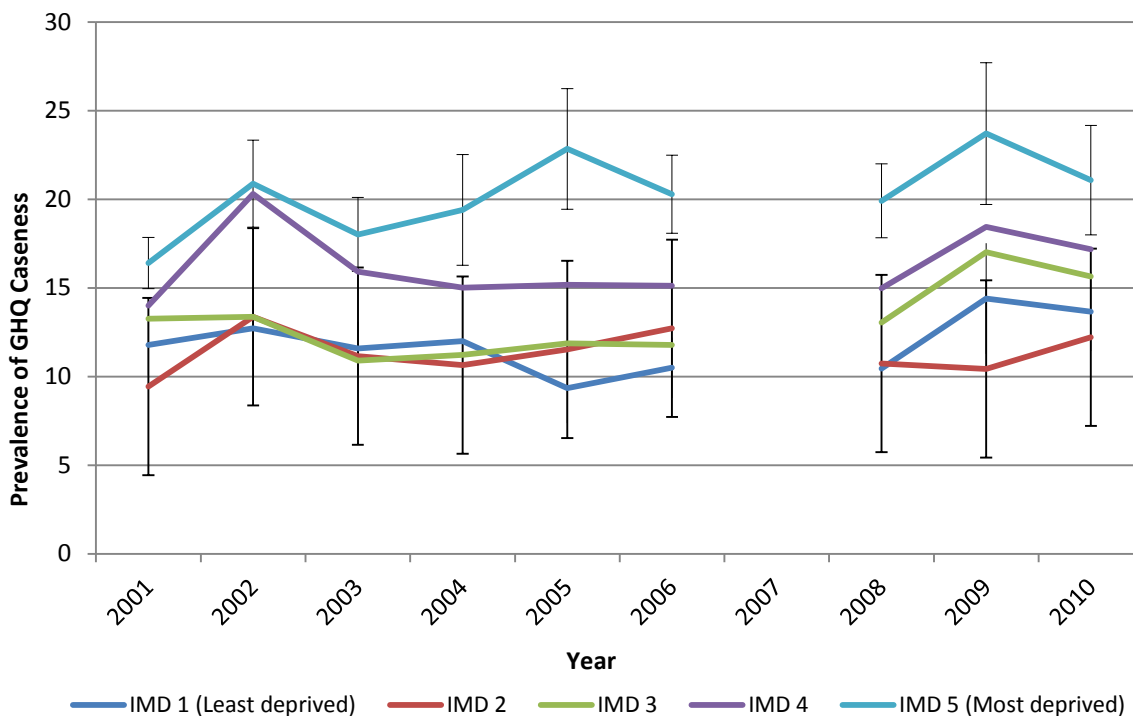

Figure 4: Prevalence of GHQ caseness by area-level deprivation (index for multiple deprivation, IMD) 2001 to 2010

review only

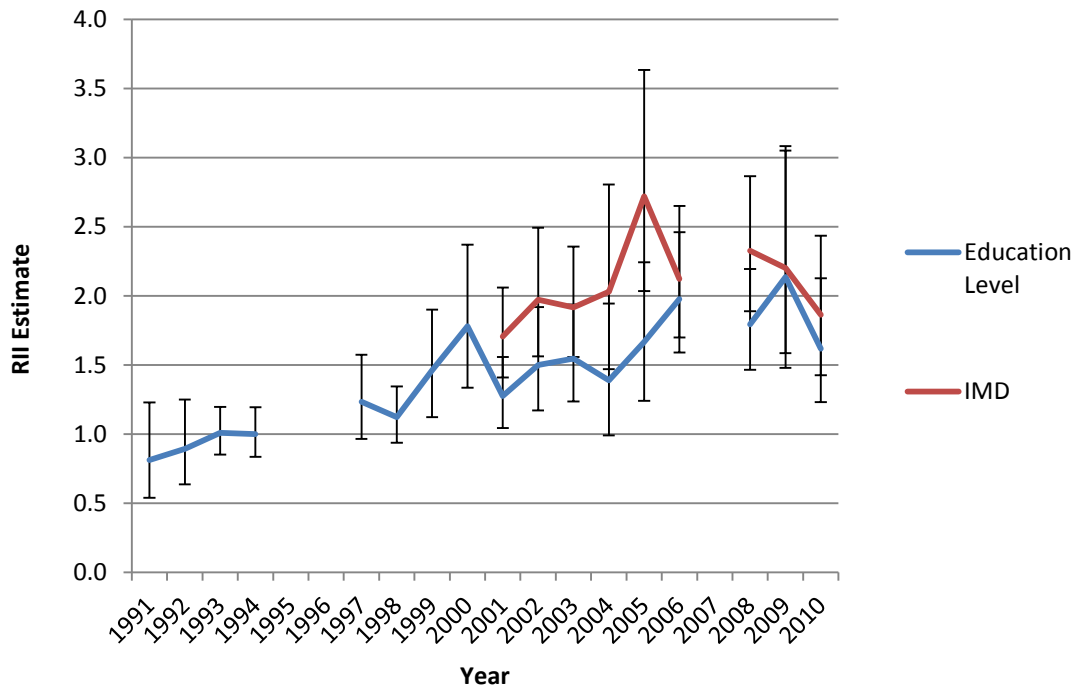

Figure 5: Relative Index of Inequality (RII) for GHQ Caseness as assessed education level and area-level deprivation (index for multiple deprivation, IMD) 1991 to 2010

Figure 6: GHQ caseness by employment status 1991 to 2010

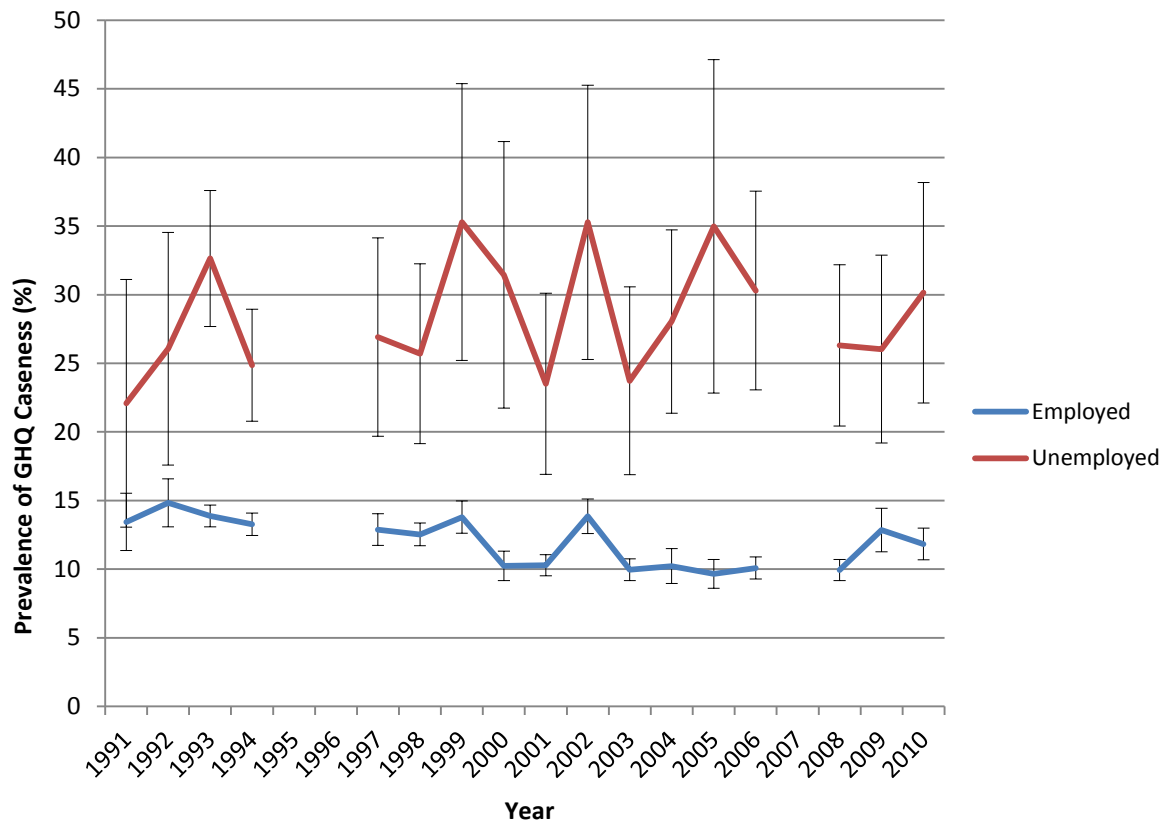

View only
